# Supplementary material for: RETRACTED ARTICLE: Long noncoding RNA SNHG1 promotes TERT expression by sponging miR-18b-5p in breast cancer
Source: Springer Nature journal article supplement (doi:10.1186/s13578-021-00675-5), 2021-08-31
Supplement: MOESM3 [file 13578_2021_675_MOESM3_ESM.pdf]

| sample          | SNHG1    | Age    | gender | pathologic_stage | Metastasis |
|-----------------|----------|--------|--------|------------------|------------|
| TCGA-AO-A1KR-01 | 12.38    | 51     | FEMALE | Stage IIA        |            |
| TCGA-HN-A2NL-01 | 12.34    |        | FEMALE | Stage IIA        |            |
| TCGA-AR-A0TU-01 | 12.18    | 35     | FEMALE | Stage IIA M0     |            |
| TCGA-EW-A1PB-01 | 11.97    | 70     | FEMALE | Stage IIIA       | M0         |
| TCGA-BH-A0B9-01 | 11.79    | 44     | FEMALE | Stage IA M0      |            |
| TCGA-A2-A04U-01 | 11.77    | 47     | FEMALE | Stage IIA M0     |            |
| TCGA-E2-A574-01 | 11.71    |        | FEMALE | Stage IIA        |            |
| TCGA-E9-A22G-01 | 11.7 47  | FEMALE |        | Stage IIA M0     |            |
| TCGA-OL-A5RW-01 | 11.57    |        | FEMALE | Stage IIA        |            |
| TCGA-D8-A1Y3-01 | 11.54    | 61     | FEMALE | Stage IIIA       | M0         |
| TCGA-EW-A2FS-01 | 11.47    | 41     | FEMALE | Stage IIB        |            |
| TCGA-B6-A0IQ-01 | 11.44    | 40     | FEMALE | Stage IIIA       | M0         |
| TCGA-AC-A62V-01 | 11.39    |        | MALE   | Stage IV         |            |
| TCGA-OL-A5D7-01 | 11.39    |        | FEMALE | Stage IIA        |            |
| TCGA-A2-A3XU-01 | 11.37    |        | FEMALE | Stage IIB        |            |
| TCGA-EW-A1J6-01 | 11.36    | 70     | FEMALE | Stage I M0       |            |
| TCGA-S3-AA17-01 | 11.34    |        | FEMALE | Stage IIB        |            |
| TCGA-E2-A1II-01 | 11.33 51 | FEMALE |        | Stage I M0       |            |
| TCGA-Z7-A8R6-01 | 11.3     |        | FEMALE | Stage I          |            |
| TCGA-A1-A0SK-01 | 11.26    | 54     | FEMALE | Stage IIA M0     |            |
| TCGA-B6-A0I2-01 | 11.25    | 45     | FEMALE | Stage IA M0      |            |
| TCGA-BH-A1ES-06 | 11.25    | 35     | FEMALE | Stage IIB        |            |
| TCGA-A2-A3Y0-01 | 11.25    |        | FEMALE | Stage IIB        |            |
| TCGA-AO-A0JB-01 | 11.21    | 50     | FEMALE | Stage IIIA       | M0         |
| TCGA-AQ-A54N-01 | 11.18    |        | FEMALE | Stage IIA        |            |
| TCGA-E2-A158-01 | 11.15    | 43     | FEMALE | Stage IIA M0     |            |
| TCGA-A7-A6VW-01 | 11.14    |        | FEMALE | Stage IIA        |            |
| TCGA-E9-A1N8-01 | 11.12    | 48     | FEMALE | Stage IIA M0     |            |
| TCGA-WT-AB44-01 | 11.12    |        | FEMALE | Stage IA         |            |
| TCGA-AR-A1AR-01 | 11.09    | 50     | FEMALE | Stage IIIA       | M0         |
| TCGA-AN-A0FY-01 | 11.08    | 55     | FEMALE | Stage IA M0      |            |
| TCGA-BH-A209-01 | 11.06    | 77     | FEMALE | Stage I          |            |
| TCGA-B6-A0IG-01 | 11.05    | 50     | FEMALE | Stage IIB M0     |            |
| TCGA-LL-A441-01 | 11.05    |        | FEMALE | Stage IA         |            |
| TCGA-GM-A3XL-01 | 11.03    |        | FEMALE | Stage IIA        |            |
| TCGA-PE-A5DC-01 | 11.02    |        | FEMALE | Stage IIIA       |            |
| TCGA-BH-A18V-01 | 11 48    | FEMALE |        | Stage IIB M0     |            |
| TCGA-EW-A6SB-01 | 10.99    |        | FEMALE | Stage II         |            |
| TCGA-BH-A8FZ-01 | 10.99    |        | FEMALE | Stage IA         |            |
| TCGA-AO-A1KS-01 | 10.98    | 69     | FEMALE | Stage IIA M0     |            |
| TCGA-AO-A12F-01 | 10.98    | 36     | FEMALE | Stage IIA M0     |            |
| TCGA-BH-A1FD-01 | 10.97    | 68     | FEMALE | Stage I M0       |            |
| TCGA-AN-A0AR-01 | 10.97    | 55     | FEMALE | Stage IIA M0     |            |

|                 |        |    |        |              |    |
|-----------------|--------|----|--------|--------------|----|
| TCGA-BH-A1FN-01 | 10.97  | 34 | FEMALE | Stage IIA M0 |    |
| TCGA-BH-A1FC-01 | 10.94  | 78 | FEMALE | Stage IIA M0 |    |
| TCGA-BH-A18U-01 | 10.94  | 72 | FEMALE | Stage IIIA   | M0 |
| TCGA-EW-A6SA-01 | 10.93  |    | MALE   | Stage II     |    |
| TCGA-AR-A1AH-01 | 10.92  | 51 | FEMALE | Stage IIB M0 |    |
| TCGA-C8-A135-01 | 10.964 |    | FEMALE | Stage IIB M0 |    |
| TCGA-B6-A402-01 | 10.9   |    | FEMALE | Stage I      |    |
| TCGA-D8-A1XK-01 | 10.89  | 55 | FEMALE | Stage IIB M0 |    |
| TCGA-AO-A0JC-01 | 10.88  | 64 | FEMALE | Stage IIA M0 |    |
| TCGA-AO-A1KP-01 | 10.87  | 77 | FEMALE | Stage IIA M0 |    |
| TCGA-BH-A18T-01 | 10.86  | 70 | FEMALE | Stage IIA M0 |    |
| TCGA-C8-A1HJ-01 | 10.86  | 53 | FEMALE | Stage IIA M0 |    |
| TCGA-E2-A1B6-01 | 10.86  | 44 | FEMALE | Stage IIA M0 |    |
| TCGA-AR-A2LR-01 | 10.85  |    | FEMALE | Stage I      |    |
| TCGA-E9-A3QA-01 | 10.85  |    | FEMALE | Stage IIA    |    |
| TCGA-E2-A1LG-01 | 10.84  | 50 | FEMALE | Stage IIA M0 |    |
| TCGA-UU-A93S-01 | 10.84  |    | FEMALE | Stage IV     |    |
| TCGA-AC-A8OP-01 | 10.84  |    | FEMALE | Stage IA     |    |
| TCGA-AR-A1AQ-01 | 10.83  | 49 | FEMALE | Stage IIA M0 |    |
| TCGA-E9-A1N5-01 | 10.83  | 45 | FEMALE | Stage IIB M0 |    |
| TCGA-A2-A04Y-01 | 10.82  | 53 | FEMALE | Stage IIB M0 |    |
| TCGA-A8-A08B-01 | 10.82  | 52 | FEMALE | Stage IIA M0 |    |
| TCGA-E2-A1AZ-01 | 10.81  | 63 | FEMALE | Stage IIB M0 |    |
| TCGA-E9-A1RB-01 | 10.81  | 40 | FEMALE | Stage IIA M0 |    |
| TCGA-E9-A54Y-01 | 10.81  |    | FEMALE | Stage IIIA   |    |
| TCGA-EW-A424-01 | 10.78  |    | FEMALE | Stage IIIA   |    |
| TCGA-A2-A04P-01 | 10.77  | 36 | FEMALE | Stage IIIC   | M0 |
| TCGA-E9-A3HO-01 | 10.77  |    | FEMALE | Stage IIA    |    |
| TCGA-B6-A0I6-01 | 10.76  | 49 | FEMALE | Stage IIA M0 |    |
| TCGA-E2-A576-01 | 10.75  |    | FEMALE | Stage IA     |    |
| TCGA-E9-A5FL-01 | 10.75  |    | FEMALE | Stage IIB    |    |
| TCGA-A2-A0SX-01 | 10.74  | 48 | FEMALE | Stage IA M0  |    |
| TCGA-WT-AB41-01 | 10.74  |    | FEMALE | Stage IIB    |    |
| TCGA-E9-A244-01 | 10.73  | 54 | FEMALE | Stage IIA M0 |    |
| TCGA-UL-AAZ6-01 | 10.71  |    | FEMALE | Stage IIA    |    |
| TCGA-AN-A0AT-01 | 10.762 |    | FEMALE | Stage IIA M0 |    |
| TCGA-AN-A04C-01 | 10.751 |    | FEMALE | Stage IIB M0 |    |
| TCGA-JL-A3YX-01 | 10.7   |    | FEMALE | Stage IIA    |    |
| TCGA-AR-A256-01 | 10.69  | 45 | FEMALE | Stage IIA M0 |    |
| TCGA-BH-A0HU-01 | 10.68  | 52 | FEMALE | Stage IA M0  |    |
| TCGA-E2-A14V-01 | 10.67  | 53 | FEMALE | Stage IIB M0 |    |
| TCGA-E9-A1N4-11 | 10.67  | 41 | FEMALE | Stage IIIA   |    |
| TCGA-E2-A9RU-01 | 10.67  |    | FEMALE | Stage IIIC   |    |
| TCGA-B6-A3ZX-01 | 10.65  |    | FEMALE | Stage IV     |    |

|                 |       |    |        |            |    |
|-----------------|-------|----|--------|------------|----|
| TCGA-LL-A7T0-01 | 10.65 |    | FEMALE | Stage IIB  |    |
| TCGA-E2-A1LH-01 | 10.63 | 59 | FEMALE | Stage I    | M0 |
| TCGA-A2-A04V-01 | 10.63 | 39 | FEMALE | Stage IIA  | M0 |
| TCGA-BH-A1FE-11 | 10.63 | 31 | FEMALE | Stage IIB  |    |
| TCGA-BH-A0HA-11 | 10.62 | 31 | FEMALE | Stage I    |    |
| TCGA-AR-A24K-01 | 10.58 | 46 | FEMALE | Stage IIA  | M0 |
| TCGA-E2-A15A-06 | 10.57 | 45 | FEMALE | Stage IIIC |    |
| TCGA-B6-A400-01 | 10.57 |    | FEMALE | Stage IIIA |    |
| TCGA-PL-A8LY-01 | 10.57 |    | FEMALE | Stage IIB  |    |
| TCGA-B6-A0IJ-01 | 10.56 | 42 | FEMALE | Stage IIB  | M0 |
| TCGA-AC-A6NO-01 | 10.56 |    | FEMALE | Stage IIB  |    |
| TCGA-E2-A1LA-01 | 10.55 | 59 | FEMALE | Stage IIA  | M0 |
| TCGA-E2-A1LK-01 | 10.54 | 84 | FEMALE | Stage IIIC | M0 |
| TCGA-E9-A247-01 | 10.54 | 59 | FEMALE | Stage IA   | M0 |
| TCGA-E2-A14Y-01 | 10.54 | 35 | FEMALE | Stage IIA  | M0 |
| TCGA-A2-A25D-01 | 10.53 | 90 | FEMALE | Stage IIIC | M0 |
| TCGA-AO-A1KQ-01 | 10.53 | 84 | MALE   | Stage IIIB | M0 |
| TCGA-A2-A1FV-01 | 10.53 | 74 | FEMALE | Stage IIB  | M0 |
| TCGA-BH-A1F5-01 | 10.53 | 62 | FEMALE | Stage IIA  |    |
| TCGA-A7-A0CJ-01 | 10.53 | 57 | FEMALE | Stage IIA  | M0 |
| TCGA-AC-A7VB-01 | 10.53 |    | FEMALE | Stage IIA  |    |
| TCGA-3C-AALJ-01 | 10.53 |    | FEMALE | Stage IIB  |    |
| TCGA-BH-A42V-01 | 10.52 |    | FEMALE | Stage IB   |    |
| TCGA-LL-A5YN-01 | 10.52 |    | FEMALE | Stage IIA  |    |
| TCGA-OL-A5RZ-01 | 10.51 |    | FEMALE | Stage IA   |    |
| TCGA-GM-A2DB-01 | 10.5  | 62 | FEMALE | Stage IIA  |    |
| TCGA-AR-A1AI-01 | 10.5  | 47 | FEMALE | Stage IIA  | M0 |
| TCGA-EW-A1J1-01 | 10.5  | 38 | FEMALE | Stage IIB  | M0 |
| TCGA-C8-A130-01 | 10.49 | 52 | FEMALE | Stage IIIA | M0 |
| TCGA-A2-A25E-01 | 10.49 | 34 | FEMALE | Stage IIIA | M0 |
| TCGA-C8-A12K-01 | 10.48 | 80 | FEMALE | Stage IIB  | M0 |
| TCGA-BH-A0DL-01 | 10.48 | 64 | FEMALE | Stage IIA  | M0 |
| TCGA-AN-A0FJ-01 | 10.48 | 59 | FEMALE | Stage IV   | M0 |
| TCGA-B6-A0RE-01 | 10.47 | 61 | FEMALE | Stage X    | M0 |
| TCGA-E2-A14N-01 | 10.47 | 37 | FEMALE | Stage IIB  | M0 |
| TCGA-A7-A4SE-01 | 10.46 |    | FEMALE | Stage IIA  |    |
| TCGA-E9-A249-01 | 10.45 | 45 | FEMALE | Stage IIA  | M0 |
| TCGA-BH-A0C3-11 | 10.44 | 47 | FEMALE | Stage I    |    |
| TCGA-E2-A1L7-01 | 10.44 | 40 | FEMALE | Stage IIIA | M0 |
| TCGA-A2-A4S3-01 | 10.44 |    | FEMALE | Stage IIB  |    |
| TCGA-A8-A09C-01 | 10.43 | 69 | FEMALE | Stage X    | M0 |
| TCGA-OL-A66I-01 | 10.43 |    | FEMALE | Stage IIA  |    |
| TCGA-C8-A26X-01 | 10.42 | 58 | FEMALE | Stage IIA  | M0 |
| TCGA-AO-A0JE-01 | 10.42 | 53 | FEMALE | Stage IIIA | M0 |

|                 |       |    |        |            |    |
|-----------------|-------|----|--------|------------|----|
| TCGA-PL-A8LV-01 | 10.42 |    | FEMALE | Stage IIIB |    |
| TCGA-D8-A27F-01 | 10.41 | 40 | FEMALE | Stage IIA  | M0 |
| TCGA-A1-A0SP-01 | 10.41 | 40 | FEMALE | Stage IIA  | M0 |
| TCGA-A7-A6VY-01 | 10.41 |    | FEMALE | Stage IIB  |    |
| TCGA-A2-A3XY-01 | 10.41 |    | FEMALE | Stage IIB  |    |
| TCGA-A2-A3XT-01 | 10.41 |    | FEMALE | Stage IIB  |    |
| TCGA-EW-A1P8-01 | 10.4  | 58 | FEMALE | Stage IIIC | M0 |
| TCGA-C8-A134-01 | 10.39 | 52 | FEMALE | Stage IIA  | M0 |
| TCGA-S3-AA10-01 | 10.39 |    | FEMALE | Stage IIA  |    |
| TCGA-EW-A1J3-01 | 10.38 | 61 | FEMALE | Stage IA   | M0 |
| TCGA-D8-A27N-01 | 10.38 | 36 | FEMALE | Stage IIIA | M0 |
| TCGA-D8-A1XL-01 | 10.38 | 34 | FEMALE | Stage IIB  | M0 |
| TCGA-LL-A8F5-01 | 10.37 |    | FEMALE | Stage IIA  |    |
| TCGA-S3-AA15-01 | 10.37 |    | FEMALE | Stage IIB  |    |
| TCGA-E2-A15S-01 | 10.36 | 34 | FEMALE | Stage IIB  | M0 |
| TCGA-AQ-A04L-01 | 10.34 | 48 | FEMALE | Stage IIA  | M0 |
| TCGA-E2-A14Z-01 | 10.33 | 64 | FEMALE | Stage I    | M0 |
| TCGA-BH-A0BF-01 | 10.33 | 56 | FEMALE | Stage IIB  | M0 |
| TCGA-D8-A1XQ-01 | 10.32 | 69 | FEMALE | Stage IIA  | M0 |
| TCGA-A8-A07C-01 | 10.32 | 57 | FEMALE | Stage IIA  | M0 |
| TCGA-BH-A208-11 | 10.32 | 48 | FEMALE | Stage IIB  |    |
| TCGA-E2-A15H-01 | 10.32 | 38 | FEMALE | Stage IIA  | M0 |
| TCGA-A2-A0CY-01 | 10.31 | 63 | FEMALE | Stage IIB  | M0 |
| TCGA-AN-A0AJ-01 | 10.29 | 79 | FEMALE | Stage IIB  | M0 |
| TCGA-C8-A278-01 | 10.29 | 61 | FEMALE | Stage IIIA | M0 |
| TCGA-AN-A0XU-01 | 10.28 | 54 | FEMALE | Stage IIA  | M0 |
| TCGA-GM-A2DO-01 | 10.28 | 54 | FEMALE | Stage I    |    |
| TCGA-D8-A13Y-01 | 10.28 | 52 | FEMALE | Stage IA   | M0 |
| TCGA-B6-A0RT-01 | 10.28 | 39 | FEMALE | Stage IIIA | M0 |
| TCGA-B6-A40C-01 | 10.28 |    | FEMALE | Stage IIB  |    |
| TCGA-B6-A0X4-01 | 10.27 | 62 | FEMALE | Stage IIB  | M0 |
| TCGA-E9-A1NA-01 | 10.27 | 58 | FEMALE | Stage IIA  | M0 |
| TCGA-E2-A1LI-01 | 10.27 | 57 | FEMALE | Stage IIB  | M0 |
| TCGA-BH-A1FM-01 | 10.27 | 44 | FEMALE | Stage IIIA | M0 |
| TCGA-AC-A6IW-01 | 10.27 |    | FEMALE | Stage IIA  |    |
| TCGA-E9-A1RG-01 | 10.26 | 62 | FEMALE | Stage IIIA | M0 |
| TCGA-C8-A27B-01 | 10.26 | 48 | FEMALE | Stage IIB  | M0 |
| TCGA-LD-A7W5-01 | 10.26 |    | FEMALE | Stage IIIC |    |
| TCGA-E9-A295-01 | 10.26 |    | FEMALE | Stage IIA  |    |
| TCGA-LD-A7W6-01 | 10.26 |    | FEMALE | Stage IIB  |    |
| TCGA-AR-A1AY-01 | 10.25 | 65 | FEMALE | Stage I    | M0 |
| TCGA-GM-A2DA-01 | 10.24 | 46 | FEMALE | Stage IIB  |    |
| TCGA-A2-A4RY-01 | 10.24 |    | FEMALE | Stage IIIC |    |
| TCGA-W8-A86G-01 | 10.24 |    | FEMALE | Stage IIA  |    |

|                 |         |    |        |              |    |
|-----------------|---------|----|--------|--------------|----|
| TCGA-A7-A26I-01 | 10.23   | 65 | FEMALE | Stage IIA M0 |    |
| TCGA-A7-A0DC-01 | 10.23   | 63 | FEMALE | Stage IA M0  |    |
| TCGA-AR-A251-01 | 10.23   | 51 | FEMALE | Stage IIIA   | M0 |
| TCGA-A7-A26G-01 | 10.23   | 50 | FEMALE | Stage IIA M0 |    |
| TCGA-E9-A1NC-01 | 10.22   | 61 | FEMALE | Stage IIB M0 |    |
| TCGA-GM-A2DF-01 | 10.22   | 53 | FEMALE | Stage IIA    |    |
| TCGA-AR-A0U0-01 | 10.21   | 73 | FEMALE | Stage IIB M0 |    |
| TCGA-A7-A26F-01 | 10.21   | 55 | FEMALE | Stage IA M0  |    |
| TCGA-AO-A12C-01 | 10.21   | 42 | FEMALE | Stage IIB M0 |    |
| TCGA-BH-A0HW-01 | 10.19   | 62 | FEMALE | Stage IA M0  |    |
| TCGA-D8-A1JM-01 | 10.19   | 59 | FEMALE | Stage IIB M0 |    |
| TCGA-AN-A0XT-01 | 10.19   | 54 | FEMALE | Stage IIIA   | M0 |
| TCGA-AO-A1KO-01 | 10.19   | 46 | FEMALE | Stage IIB M0 |    |
| TCGA-C8-A137-01 | 10.19   | 34 | FEMALE | Stage IIB M0 |    |
| TCGA-AC-A7VC-01 | 10.19   |    | FEMALE | Stage IIB    |    |
| TCGA-AN-A03Y-01 | 10.18   | 66 | FEMALE | Stage IIA M0 |    |
| TCGA-BH-A0C7-01 | 10.18   | 48 | FEMALE | Stage IIB M0 |    |
| TCGA-A2-A0D4-01 | 10.18   | 37 | FEMALE | Stage IIB M0 |    |
| TCGA-AC-A3YI-01 | 10.18   |    | FEMALE | Stage IIIC   |    |
| TCGA-B6-A0IE-01 | 10.17   | 38 | FEMALE | Stage IIIA   | M0 |
| TCGA-OL-A66H-01 | 10.17   |    | FEMALE | Stage IB     |    |
| TCGA-B6-A0I1-01 | 10.16   |    | FEMALE | Stage IIA    |    |
| TCGA-BH-A0DD-01 | 10.15   | 58 | MALE   | Stage IIB M0 |    |
| TCGA-GM-A2DH-01 | 10.15   | 58 | FEMALE | Stage I      |    |
| TCGA-A7-A426-01 | 10.15   |    | FEMALE | Stage IIIC   |    |
| TCGA-BH-A0B7-11 | 10.14   | 42 | FEMALE | Stage IIB    |    |
| TCGA-GM-A4E0-01 | 10.13   |    | FEMALE | Stage IIIC   |    |
| TCGA-OL-A6VO-01 | 10.13   |    | FEMALE | Stage IA     |    |
| TCGA-D8-A1JP-01 | 10.12   | 73 | FEMALE | Stage IA M0  |    |
| TCGA-LD-A66U-01 | 10.12   |    | FEMALE | Stage IIB    |    |
| TCGA-B6-A0X1-01 | 10.11   | 48 | FEMALE | Stage IIB M1 |    |
| TCGA-S3-AA0Z-01 | 10.11   |    | FEMALE | Stage IIB    |    |
| TCGA-AN-A0G0-01 | 10.1 56 |    | FEMALE | Stage IIA M0 |    |
| TCGA-BH-A18V-06 | 10.1 48 |    | FEMALE | Stage IIB    |    |
| TCGA-BH-A0AU-11 | 10.1 45 |    | FEMALE | Stage IIA    |    |
| TCGA-B6-A408-01 | 10.1    |    | FEMALE | Stage IIIC   |    |
| TCGA-S3-AA14-01 | 10.1    |    | FEMALE | Stage I      |    |
| TCGA-BH-A1EY-01 | 10.09   | 79 | FEMALE | Stage IIA M0 |    |
| TCGA-EW-A1IZ-01 | 10.09   | 53 | FEMALE | Stage IIIA   | M0 |
| TCGA-3C-AAAU-01 | 10.09   |    | FEMALE | Stage X      |    |
| TCGA-AR-A24S-01 | 10.07   | 61 | FEMALE | Stage I      | M0 |
| TCGA-E9-A1RA-01 | 10.07   | 48 | FEMALE | Stage IA M0  |    |
| TCGA-AC-A8OQ-01 | 10.07   |    | FEMALE | Stage IIB    |    |
| TCGA-A8-A08O-01 | 10.06   | 45 | FEMALE | Stage IV M1  |    |

|                 |         |    |        |               |    |
|-----------------|---------|----|--------|---------------|----|
| TCGA-GM-A3XN-01 | 10.06   |    | FEMALE | Stage IIIA    |    |
| TCGA-EW-A3E8-01 | 10.06   |    | FEMALE | Stage IIB     |    |
| TCGA-AC-A2QH-01 | 10.06   |    | FEMALE | Stage IIB     |    |
| TCGA-AN-A0FD-01 | 10.05   | 71 | FEMALE | Stage IIA M0  |    |
| TCGA-A8-A08P-01 | 10.05   | 70 | FEMALE | Stage IIIA    | M0 |
| TCGA-A2-A04T-01 | 10.05   | 62 | FEMALE | Stage IIA M0  |    |
| TCGA-A8-A0A9-01 | 10.04   | 80 | FEMALE | Stage IIA M0  |    |
| TCGA-E9-A1RE-01 | 10.04   | 74 | FEMALE | Stage IIIA    | M0 |
| TCGA-AO-A03R-01 | 10.04   | 57 | FEMALE | Stage IIB M0  |    |
| TCGA-BH-AB28-01 | 10.04   |    | FEMALE | Stage IIIA    |    |
| TCGA-A8-A09M-01 | 10.03   | 75 | FEMALE | Stage IIIC    | M0 |
| TCGA-A8-A06R-01 | 10.03   | 69 | FEMALE | Stage IIB M0  |    |
| TCGA-A2-A0EQ-01 | 10.03   | 64 | FEMALE | Stage IIA M0  |    |
| TCGA-A2-A0D0-01 | 10.03   | 60 | FEMALE | Stage IIA M0  |    |
| TCGA-BH-A0E1-11 | 10.03   | 52 | FEMALE | Stage IIB     |    |
| TCGA-C8-A1HF-01 | 10.03   | 48 | FEMALE | Stage IIA M0  |    |
| TCGA-A2-A3XZ-01 | 10.03   |    | FEMALE | Stage I       |    |
| TCGA-A8-A079-01 | 10.02   | 69 | FEMALE | Stage IIIB M0 |    |
| TCGA-E2-A14R-01 | 10.02   | 62 | FEMALE | Stage IIA M0  |    |
| TCGA-BH-A1ES-01 | 10.02   | 35 | FEMALE | Stage IIB M0  |    |
| TCGA-A2-A3XW-01 | 10.02   |    | FEMALE | Stage IIB     |    |
| TCGA-AO-A125-01 | 10.01   | 72 | FEMALE | Stage IIA M0  |    |
| TCGA-EW-A1PH-01 | 10.01   | 52 | FEMALE | Stage IIA M0  |    |
| TCGA-AR-A254-01 | 10.01   | 50 | FEMALE | Stage IIIA    | M0 |
| TCGA-A2-A0D2-01 | 10.01   | 45 | FEMALE | Stage IIA M0  |    |
| TCGA-A2-A0CM-01 | 10.01   | 40 | FEMALE | Stage IIA M0  |    |
| TCGA-4H-AAAK-01 | 10.01   |    | FEMALE | Stage IIIA    |    |
| TCGA-AR-A2LE-01 | 10      |    | FEMALE | Stage I       |    |
| TCGA-E2-A14X-01 | 9.997   | 55 | FEMALE | Stage IIIA    | M0 |
| TCGA-BH-A28O-01 | 9.992   |    | FEMALE | Stage IIIC    |    |
| TCGA-EW-A1OV-01 | 9.988   | 56 | FEMALE | Stage IIB M0  |    |
| TCGA-BH-A0H5-11 | 9.983   | 45 | FEMALE | Stage I       |    |
| TCGA-LD-A9QF-01 | 9.979   |    | FEMALE | Stage IA      |    |
| TCGA-GM-A3NY-01 | 9.962   |    | FEMALE | Stage IIB     |    |
| TCGA-BH-A5J0-01 | 9.958   |    | FEMALE | Stage IA      |    |
| TCGA-PE-A5DD-01 | 9.956   |    | FEMALE | Stage IIA     |    |
| TCGA-BH-A5IZ-01 | 9.956   |    | FEMALE | Stage IIB     |    |
| TCGA-A2-A25B-01 | 9.955   | 39 | FEMALE | Stage IIB M0  |    |
| TCGA-LL-A6FQ-01 | 9.945   |    | FEMALE | Stage IIIA    |    |
| TCGA-OL-A5S0-01 | 9.936   |    | FEMALE | Stage IIB     |    |
| TCGA-A2-A0SV-01 | 9.935   | 63 | FEMALE | Stage IV M1   |    |
| TCGA-BH-A204-01 | 9.931   | 80 | FEMALE | Stage IIB     |    |
| TCGA-A2-A0T0-01 | 9.931   | 59 | FEMALE | Stage IIB M0  |    |
| TCGA-E2-A1LB-11 | 9.93 41 |    | FEMALE | Stage IIB     |    |

|                      |         |           |               |  |
|----------------------|---------|-----------|---------------|--|
| TCGA-E9-A3X8-01      | 9.93    | FEMALE    | Stage IIB     |  |
| TCGA-BH-A42U-01      | 9.926   | FEMALE    | Stage IIA     |  |
| TCGA-Z7-A8R5-01      | 9.92    | FEMALE    | Stage IIIA    |  |
| TCGA-BH-A0C0-01      | 9.913   | 62 FEMALE | Stage IIA M0  |  |
| TCGA-EW-A1OW-01      | 9.912   | 58 FEMALE | Stage IIA M0  |  |
| TCGA-E2-A1IH-01      | 9.91 80 | FEMALE    | Stage I M0    |  |
| TCGA-AO-A0J9-01      | 9.909   | 61 FEMALE | Stage IIIC M0 |  |
| TCGA-E2-A15J-01      | 9.909   | 51 FEMALE | Stage I M0    |  |
| TCGA-AC-A3TM-01      | 9.908   | FEMALE    | Stage IIIA    |  |
| TCGA-A2-A3XS-01      | 9.906   | FEMALE    | Stage IIIA    |  |
| TCGA-E2-A154-01      | 9.905   | 68 FEMALE | Stage I M0    |  |
| TCGA-A2-A1FX-01      | 9.902   | 61 FEMALE | Stage IIIA M0 |  |
| TCGA-B6-A401-01      | 9.899   | FEMALE    | Stage IIA     |  |
| TCGA-A8-A075-01      | 9.898   | 42 FEMALE | Stage IIB M0  |  |
| TCGA-AO-A129-01      | 9.898   | 29 FEMALE | Stage IIB M0  |  |
| TCGA-A2-A3XV-01      | 9.896   | FEMALE    | Stage IIA     |  |
| TCGA-BH-A0BQ-11      | 9.894   | 39 FEMALE | Stage I       |  |
| TCGA-S3-A6ZF-01      | 9.894   | FEMALE    | Stage IIA     |  |
| TCGA-BH-A28Q-01      | 9.893   | 46 FEMALE | Stage IIB     |  |
| TCGA-AN-A0FX-01      | 9.889   | 52 FEMALE | Stage IIA M0  |  |
| TCGA-A7-A5ZX-01      | 9.885   | FEMALE    | Stage IIIC    |  |
| TCGA-A2-A04R-01      | 9.873   | 36 FEMALE | Stage IA M0   |  |
| TCGA-OL-A66O-01      | 9.871   | FEMALE    | Stage IIB     |  |
| TCGA-AR-A2LL-01      | 9.871   | FEMALE    | Stage IIB     |  |
| TCGA-A8-A08R-01      | 9.862   | 52 FEMALE | Stage IIB M0  |  |
| TCGA-C8-A12V-01      | 9.86 55 | FEMALE    | Stage IIA M0  |  |
| TCGA-AC-A3OD-01      | 9.86    | FEMALE    | Stage IIB     |  |
| TCGA-E9-A5FK-01      | 9.859   | FEMALE    | Stage IIIC    |  |
| TCGA-E2-A1IP-019.858 | 42      |           | M0            |  |
| TCGA-OL-A66P-01      | 9.858   | FEMALE    | Stage IIA     |  |
| TCGA-E2-A14S-01      | 9.849   | 65 FEMALE | Stage I M0    |  |
| TCGA-A7-A4SF-01      | 9.848   | FEMALE    | Stage IIA     |  |
| TCGA-BH-A18M-01      | 9.846   | 39 FEMALE | Stage IIIA M0 |  |
| TCGA-A7-A6VV-01      | 9.84    | FEMALE    | Stage IIA     |  |
| TCGA-A8-A07R-01      | 9.839   | 80 FEMALE | Stage IIIC M0 |  |
| TCGA-AQ-A54O-01      | 9.839   | MALE      | Stage IIA     |  |
| TCGA-AR-A1AW-01      | 9.835   | 65 FEMALE | Stage IIA M0  |  |
| TCGA-BH-A0E2-01      | 9.832   | 49 FEMALE | Stage IIIA M0 |  |
| TCGA-BH-A0E6-01      | 9.83 69 | FEMALE    | Stage IA M0   |  |
| TCGA-BH-A1FG-11      | 9.825   | 88 FEMALE | Stage I       |  |
| TCGA-AR-A0TZ-01      | 9.825   | 43 FEMALE | Stage IIIA M0 |  |
| TCGA-AN-A046-01      | 9.818   | 68 FEMALE | Stage IIA M0  |  |
| TCGA-JL-A3YW-01      | 9.816   | FEMALE    | Stage IIB     |  |
| TCGA-E9-A1N5-11      | 9.813   | 45 FEMALE | Stage IIB     |  |

|                 |        |    |        |            |    |
|-----------------|--------|----|--------|------------|----|
| TCGA-AN-A0XV-01 | 9.812  | 67 | FEMALE | Stage IIIA | M0 |
| TCGA-AO-A0JL-01 | 9.8159 |    | FEMALE | Stage IIIA | M0 |
| TCGA-LL-A7SZ-01 | 9.806  |    | FEMALE | Stage IIB  |    |
| TCGA-AC-A62X-01 | 9.805  |    | FEMALE | Stage IIA  |    |
| TCGA-BH-A1FN-11 | 9.801  | 34 | FEMALE | Stage IIA  |    |
| TCGA-V7-A7HQ-01 | 9.793  |    | FEMALE | Stage IIIA |    |
| TCGA-AR-A0TP-01 | 9.7943 |    | FEMALE | Stage IIA  | M0 |
| TCGA-AR-A0U1-01 | 9.7936 |    | FEMALE | Stage IIB  | M0 |
| TCGA-LD-A74U-01 | 9.788  |    | FEMALE | Stage IIIC |    |
| TCGA-PL-A8LZ-01 | 9.781  |    | FEMALE | Stage IIIB |    |
| TCGA-AN-A04D-01 | 9.779  | 58 | FEMALE | Stage IIB  | M0 |
| TCGA-AC-A6IV-01 | 9.778  |    | FEMALE | Stage IIB  |    |
| TCGA-E9-A2JT-01 | 9.774  |    | FEMALE | Stage IIA  |    |
| TCGA-EW-A1PC-01 | 9.769  |    | FEMALE | Stage IIB  |    |
| TCGA-D8-A1Y2-01 | 9.767  | 71 | FEMALE | Stage IIA  | M0 |
| TCGA-BH-A0W5-01 | 9.763  | 77 | FEMALE | Stage IIA  | M0 |
| TCGA-A2-A0D1-01 | 9.762  | 76 | FEMALE | Stage IIA  | M0 |
| TCGA-E9-A243-01 | 9.762  | 52 | FEMALE | Stage IIA  | M0 |
| TCGA-A2-A4RX-01 | 9.759  |    | FEMALE | Stage IIA  |    |
| TCGA-BH-A1EW-11 | 9.758  | 38 | FEMALE | Stage IIA  |    |
| TCGA-OL-A5RV-01 | 9.757  |    | FEMALE | Stage IIIC |    |
| TCGA-E2-A573-01 | 9.757  |    | FEMALE | Stage IA   |    |
| TCGA-D8-A1XZ-01 | 9.753  | 81 | FEMALE | Stage IIIA | M0 |
| TCGA-E9-A6HE-01 | 9.75   |    | FEMALE | Stage IIIC |    |
| TCGA-GM-A3XG-01 | 9.75   |    | FEMALE | Stage IIIA |    |
| TCGA-D8-A1XA-01 | 9.748  | 64 | FEMALE | Stage IA   | M0 |
| TCGA-E2-A15A-01 | 9.748  | 45 | FEMALE | Stage IIIC | M0 |
| TCGA-A2-A1G1-01 | 9.745  | 85 | FEMALE | Stage IIB  | M0 |
| TCGA-AO-A12A-01 | 9.739  | 47 | FEMALE | Stage IIA  | M0 |
| TCGA-OL-A97C-01 | 9.738  |    | FEMALE | Stage IIB  |    |
| TCGA-A2-A0YL-01 | 9.735  | 48 | FEMALE | Stage IIIA | M0 |
| TCGA-BH-A18H-01 | 9.726  | 63 | FEMALE | Stage IA   | M0 |
| TCGA-C8-A8HR-01 | 9.722  |    | FEMALE | Stage IIIA |    |
| TCGA-AR-A2LO-01 | 9.717  |    | FEMALE | Stage IIB  |    |
| TCGA-A8-A09Q-01 | 9.716  | 83 | FEMALE | Stage IIIB | M0 |
| TCGA-E9-A229-01 | 9.714  | 37 | FEMALE | Stage IA   | M0 |
| TCGA-E2-A2P5-01 | 9.713  |    | FEMALE | Stage IIIC |    |
| TCGA-EW-A3U0-01 | 9.713  |    | FEMALE | Stage IIIA |    |
| TCGA-E2-A56Z-01 | 9.713  |    | FEMALE | Stage IIB  |    |
| TCGA-EW-A1P3-01 | 9.709  | 48 | FEMALE | Stage IIA  | M0 |
| TCGA-BH-A0BW-11 | 9.707  | 71 | FEMALE | Stage I    |    |
| TCGA-E9-A1RI-01 | 9.706  | 43 | FEMALE | Stage IIIA | M0 |
| TCGA-BH-A18I-01 | 9.703  | 53 | FEMALE | Stage IIA  | M0 |
| TCGA-E2-A15E-06 | 9.701  | 40 | FEMALE | Stage IIA  |    |

|                 |         |    |        |              |    |
|-----------------|---------|----|--------|--------------|----|
| TCGA-AC-A8OR-01 | 9.696   |    | FEMALE | Stage IA     |    |
| TCGA-BH-A1EV-01 | 9.694   | 45 | FEMALE | Stage IIIA   |    |
| TCGA-AC-A3W6-01 | 9.693   |    | FEMALE | Stage IIIA   |    |
| TCGA-S3-AA11-01 | 9.69    |    | FEMALE | Stage IIA    |    |
| TCGA-S3-AA12-01 | 9.689   |    | FEMALE | Stage IIIA   |    |
| TCGA-XX-A899-01 | 9.681   |    | FEMALE | Stage IIIA   |    |
| TCGA-OL-A66L-01 | 9.681   |    | FEMALE | Stage IA     |    |
| TCGA-D8-A73X-01 | 9.679   |    | FEMALE | Stage IIA    |    |
| TCGA-E9-A54X-01 | 9.675   |    | FEMALE | Stage IA     |    |
| TCGA-5T-A9QA-01 | 9.672   |    | FEMALE | Stage IIA    |    |
| TCGA-LL-A5YO-01 | 9.672   |    | FEMALE | Stage IA     |    |
| TCGA-A2-A0ST-01 | 9.67 62 |    | FEMALE | Stage IIA M0 |    |
| TCGA-BH-A18K-01 | 9.669   | 46 | FEMALE | Stage I      | M0 |
| TCGA-BH-A1EV-11 | 9.662   | 45 | FEMALE | Stage IIIA   |    |
| TCGA-OL-A6VR-01 | 9.661   |    | FEMALE | Stage IA     |    |
| TCGA-A1-A0SB-01 | 9.66 70 |    | FEMALE | Stage I      | M0 |
| TCGA-AR-A5QP-01 | 9.659   |    | FEMALE | Stage IIB    |    |
| TCGA-A7-A0DA-01 | 9.658   | 62 | FEMALE | Stage IIA M0 |    |
| TCGA-B6-A0X0-01 | 9.658   | 54 | FEMALE | Stage I      | M0 |
| TCGA-E2-A1L8-01 | 9.658   | 52 | FEMALE | Stage IIB M0 |    |
| TCGA-E9-A1R2-01 | 9.658   | 51 | FEMALE | Stage IIIC   | M0 |
| TCGA-E2-A1B5-01 | 9.656   | 46 | FEMALE | Stage IIA M0 |    |
| TCGA-B6-A0WX-01 | 9.655   | 40 | FEMALE | Stage IIIA   | M0 |
| TCGA-BH-A0DG-11 | 9.654   | 30 | FEMALE | Stage IIA    |    |
| TCGA-E9-A1N6-11 | 9.652   | 52 | FEMALE | Stage IIB    |    |
| TCGA-D8-A1Y1-01 | 9.651   | 80 | FEMALE | Stage IIIA   | M0 |
| TCGA-A2-A0CW-01 | 9.649   | 67 | FEMALE | Stage IIB M0 |    |
| TCGA-BH-A0GY-01 | 9.649   | 67 | FEMALE | Stage IIA M0 |    |
| TCGA-C8-A12Y-01 | 9.647   | 44 | FEMALE | Stage IIB M0 |    |
| TCGA-E2-A1B1-01 | 9.646   | 45 | FEMALE | Stage IIB M0 |    |
| TCGA-EW-A1PG-01 | 9.645   | 53 | FEMALE | Stage IIB M0 |    |
| TCGA-A8-A07L-01 | 9.644   | 58 | FEMALE | Stage IIIA   | M0 |
| TCGA-AR-A255-01 | 9.641   | 62 | FEMALE | Stage I      | M0 |
| TCGA-AC-A3QP-01 | 9.641   |    | FEMALE | Stage IIB    |    |
| TCGA-BH-A18G-01 | 9.637   | 81 | FEMALE | Stage IA M0  |    |
| TCGA-B6-A0RH-01 | 9.637   | 51 | FEMALE | Stage IIA M0 |    |
| TCGA-BH-A1EU-11 | 9.635   | 83 | FEMALE | Stage I      |    |
| TCGA-B6-A0I8-01 | 9.632   | 46 | FEMALE | Stage X      | M0 |
| TCGA-A2-A0YM-01 | 9.631   | 67 | FEMALE | Stage IIA M0 |    |
| TCGA-B6-A0RM-01 | 9.629   | 57 | FEMALE | Stage X      |    |
| TCGA-AQ-A7U7-01 | 9.626   |    | FEMALE | Stage IIIA   |    |
| TCGA-A7-A4SA-01 | 9.623   |    | FEMALE | Stage IIB    |    |
| TCGA-B6-A0IO-01 | 9.619   | 66 | FEMALE | Stage IIA M0 |    |
| TCGA-OL-A66K-01 | 9.619   |    | FEMALE | Stage IIA    |    |

|                      |       |    |        |              |    |
|----------------------|-------|----|--------|--------------|----|
| TCGA-C8-A3M7-01      | 9.617 |    | FEMALE | Stage IIIB   |    |
| TCGA-OL-A5D8-01      | 9.614 |    | FEMALE | Stage IIB    |    |
| TCGA-AO-A03L-01      | 9.613 | 34 | FEMALE | Stage IIIA   | M0 |
| TCGA-B6-A1KN-01      | 9.612 | 57 | FEMALE | Stage IIIBM0 |    |
| TCGA-E2-A10C-01      | 9.612 | 54 | FEMALE | Stage IIB    | M0 |
| TCGA-GM-A2DD-01      | 9.611 | 53 | FEMALE | Stage I      |    |
| TCGA-E9-A3Q9-01      | 9.607 |    | FEMALE | Stage IIIC   |    |
| TCGA-E9-A1N4-01      | 9.606 | 41 | FEMALE | Stage IIIA   | M0 |
| TCGA-A2-A259-01      | 9.605 | 70 | FEMALE | Stage I      | M0 |
| TCGA-E2-A15I-019.605 | 44    |    | FEMALE | Stage IIA    | M0 |
| TCGA-AR-A24X-01      | 9.603 | 52 | FEMALE | Stage IIA    | M0 |
| TCGA-D8-A1XB-01      | 9.602 | 62 | FEMALE | Stage IIB    | M0 |
| TCGA-AO-A0J7-01      | 9.599 | 71 | FEMALE | Stage IIB    | M0 |
| TCGA-E9-A248-01      | 9.599 | 51 | FEMALE | Stage IIA    | M0 |
| TCGA-A8-A09N-01      | 9.598 | 57 | FEMALE | Stage IIIC   | M0 |
| TCGA-AC-A2BM-01      | 9.596 |    | FEMALE | Stage IIB    |    |
| TCGA-D8-A147-01      | 9.594 | 45 | FEMALE |              | M0 |
| TCGA-D8-A4Z1-01      | 9.594 |    | FEMALE | Stage IA     |    |
| TCGA-E2-A15M-01      | 9.591 | 66 | FEMALE | Stage IIA    | M0 |
| TCGA-C8-A12M-01      | 9.59  | 70 | FEMALE | Stage IIA    | M0 |
| TCGA-AN-A0XL-01      | 9.589 | 61 | FEMALE | Stage IIA    | M0 |
| TCGA-EW-A2FW-01      | 9.587 | 52 | FEMALE | Stage IIA    |    |
| TCGA-BH-A0E0-01      | 9.587 | 38 | FEMALE | Stage IIIC   | M0 |
| TCGA-BH-A1FJ-11      | 9.586 | 66 | FEMALE | Stage IIIA   |    |
| TCGA-A2-A0YE-01      | 9.586 | 48 | FEMALE | Stage IIB    | M0 |
| TCGA-AC-A8OS-01      | 9.586 |    | FEMALE | Stage IIA    |    |
| TCGA-BH-A18K-11      | 9.582 | 46 | FEMALE | Stage I      |    |
| TCGA-E2-A14W-01      | 9.581 | 78 | MALE   | Stage IIA    | M0 |
| TCGA-AC-A3BB-01      | 9.578 |    | FEMALE | Stage IIIA   |    |
| TCGA-BH-A0AZ-11      | 9.576 | 47 | FEMALE | Stage IIIA   |    |
| TCGA-A7-A4SD-01      | 9.576 |    | FEMALE | Stage IIA    |    |
| TCGA-AO-A0J6-01      | 9.573 | 61 | FEMALE | Stage IIA    | M0 |
| TCGA-D8-A1XD-01      | 9.573 | 36 | FEMALE | Stage IIIA   | M0 |
| TCGA-EW-A1P0-01      | 9.572 | 55 | FEMALE | Stage IIB    | M0 |
| TCGA-A2-A3XX-01      | 9.57  |    | FEMALE | Stage IIA    |    |
| TCGA-AC-A3TN-01      | 9.568 |    | FEMALE | Stage IIB    |    |
| TCGA-E9-A1NI-01      | 9.566 | 51 | FEMALE | Stage IIA    | M0 |
| TCGA-LL-A73Z-01      | 9.566 |    | FEMALE | Stage IV     |    |
| TCGA-C8-A26W-01      | 9.565 | 58 | FEMALE | Stage IIB    | M0 |
| TCGA-OL-A5RU-01      | 9.561 |    | FEMALE | Stage IIA    |    |
| TCGA-A7-A13D-01      | 9.559 | 46 | FEMALE | Stage IIA    | M0 |
| TCGA-AR-A1AJ-01      | 9.557 | 83 | FEMALE | Stage I      | M0 |
| TCGA-A2-A04Q-01      | 9.557 | 48 | FEMALE | Stage IA     | M0 |
| TCGA-EW-A6SC-01      | 9.557 |    | FEMALE | Stage IIA    |    |

|                 |        |    |        |            |    |
|-----------------|--------|----|--------|------------|----|
| TCGA-GM-A2DL-01 | 9.555  | 50 | FEMALE | Stage I    |    |
| TCGA-BH-A0BT-01 | 9.551  | 56 | FEMALE | Stage IIA  | M0 |
| TCGA-GM-A2D9-01 | 9.549  | 69 | FEMALE | Stage I    |    |
| TCGA-AC-A3YJ-01 | 9.548  |    | FEMALE | Stage IIA  |    |
| TCGA-BH-A0WA-01 | 9.545  | 82 | FEMALE | Stage I    | M0 |
| TCGA-D8-A3Z5-01 | 9.542  |    | FEMALE | Stage IIIC |    |
| TCGA-A8-A08T-01 | 9.538  | 64 | FEMALE | Stage IV   | M1 |
| TCGA-HN-A2OB-01 | 9.534  |    | FEMALE | Stage IIB  |    |
| TCGA-AO-A0J2-01 | 9.5341 |    | FEMALE | Stage IA   | M0 |
| TCGA-BH-A0B5-01 | 9.529  | 40 | FEMALE | Stage IIIA | M0 |
| TCGA-D8-A1X9-01 | 9.528  | 66 | FEMALE | Stage IIB  | M0 |
| TCGA-AC-A3W7-01 | 9.528  |    | FEMALE | Stage IIB  |    |
| TCGA-BH-A0BS-11 | 9.527  | 55 | FEMALE | Stage IIIA |    |
| TCGA-A2-A0EP-01 | 9.527  |    | FEMALE | Stage I    |    |
| TCGA-BH-A18V-11 | 9.523  | 48 | FEMALE | Stage IIB  |    |
| TCGA-BH-A0DO-11 | 9.518  | 78 | FEMALE | Stage I    |    |
| TCGA-E2-A14P-01 | 9.516  | 79 | FEMALE | Stage IIIC | M0 |
| TCGA-AQ-A04J-01 | 9.514  | 45 | FEMALE | Stage IIA  | M0 |
| TCGA-BH-A0C0-11 | 9.504  | 62 | FEMALE | Stage IIA  |    |
| TCGA-AC-A3QQ-01 | 9.503  |    | FEMALE | Stage IA   |    |
| TCGA-BH-A8G0-01 | 9.503  |    | FEMALE | Stage IIB  |    |
| TCGA-AR-A24H-01 | 9.498  | 65 | FEMALE | Stage IIA  | M0 |
| TCGA-BH-A0B3-11 | 9.498  | 53 | FEMALE | Stage IIB  |    |
| TCGA-A2-A0CR-01 | 9.495  |    | FEMALE | Stage IIB  |    |
| TCGA-E2-A1LL-01 | 9.493  | 73 | FEMALE | Stage IIIA | M0 |
| TCGA-5L-AAT1-01 | 9.487  |    | FEMALE | Stage IV   |    |
| TCGA-XX-A89A-01 | 9.487  |    | FEMALE | Stage IIB  |    |
| TCGA-D8-A27T-01 | 9.483  | 53 | FEMALE | Stage IIIC | M0 |
| TCGA-BH-A18R-11 | 9.483  | 50 | FEMALE | Stage IIA  |    |
| TCGA-BH-A18Q-11 | 9.481  | 56 | FEMALE | Stage IIB  |    |
| TCGA-D8-A1Y0-01 | 9.479  | 65 | FEMALE | Stage IIIA | M0 |
| TCGA-A8-A092-01 | 9.479  | 48 | FEMALE | Stage IIIA | M0 |
| TCGA-C8-A12T-01 | 9.478  | 43 | FEMALE | Stage IIA  | M0 |
| TCGA-A2-A1FW-01 | 9.475  | 62 | FEMALE | Stage IIIA | M0 |
| TCGA-C8-A1HM-01 | 9.472  | 74 | FEMALE | Stage IIA  | M0 |
| TCGA-OL-A5RX-01 | 9.472  |    | FEMALE | Stage IA   |    |
| TCGA-E2-A1BC-11 | 9.471  | 63 | FEMALE | Stage IA   |    |
| TCGA-AR-A0TT-01 | 9.467  | 53 | FEMALE | Stage IIIA | M0 |
| TCGA-BH-A1FB-11 | 9.466  | 60 | FEMALE | Stage IIB  |    |
| TCGA-BH-A42T-01 | 9.466  |    | FEMALE | Stage IIA  |    |
| TCGA-5L-AAT0-01 | 9.465  |    | FEMALE | Stage IIA  |    |
| TCGA-E9-A2JS-01 | 9.459  |    | FEMALE | Stage IIB  |    |
| TCGA-BH-A0B3-01 | 9.458  | 53 | FEMALE | Stage IIB  | M0 |
| TCGA-A8-A07I-01 | 9.455  | 69 | FEMALE | Stage IIIA | M0 |

|                 |       |    |        |            |    |
|-----------------|-------|----|--------|------------|----|
| TCGA-A2-A0CP-01 | 9.454 | 60 | FEMALE | Stage IA   | M0 |
| TCGA-AN-A0XO-01 | 9.448 | 59 | FEMALE | Stage IIIA | M0 |
| TCGA-C8-A27A-01 | 9.446 | 48 | FEMALE | Stage IIB  | M0 |
| TCGA-OK-A5Q2-01 | 9.444 |    | FEMALE | Stage II   |    |
| TCGA-C8-A131-01 | 9.44  | 82 | FEMALE | Stage IIIA | M0 |
| TCGA-D8-A1XR-01 | 9.437 | 56 | FEMALE | Stage IIB  | M0 |
| TCGA-BH-A1FE-01 | 9.437 | 31 | FEMALE | Stage IIB  | M0 |
| TCGA-OL-A66N-01 | 9.437 |    | FEMALE | Stage IIIC |    |
| TCGA-BH-A0DT-01 | 9.436 | 41 | FEMALE | Stage IIA  | M0 |
| TCGA-A8-A07O-01 | 9.426 | 51 | FEMALE | Stage IIA  | M0 |
| TCGA-BH-A201-01 | 9.423 | 64 | FEMALE | Stage IA   |    |
| TCGA-BH-A0BJ-11 | 9.423 | 41 | FEMALE | Stage IIB  |    |
| TCGA-A2-A25A-01 | 9.422 | 44 | FEMALE | Stage IIA  | M0 |
| TCGA-MS-A51U-01 | 9.421 |    | FEMALE | Stage IIB  |    |
| TCGA-EW-A1PA-01 | 9.42  | 59 | FEMALE | Stage IIB  | M0 |
| TCGA-AR-A5QQ-01 | 9.419 |    | FEMALE | Stage IIIA |    |
| TCGA-3C-AALK-01 | 9.415 |    | FEMALE | Stage IA   |    |
| TCGA-E2-A109-01 | 9.413 | 64 | FEMALE | Stage IIA  | M0 |
| TCGA-BH-A1EU-01 | 9.412 | 83 | FEMALE | Stage I    | M0 |
| TCGA-C8-A274-01 | 9.412 | 63 | FEMALE | Stage IIA  | M0 |
| TCGA-AC-A2B8-01 | 9.411 |    | FEMALE | Stage IIB  |    |
| TCGA-A7-A6VX-01 | 9.408 |    | FEMALE | Stage IIA  |    |
| TCGA-A2-A0EU-01 | 9.406 | 79 | FEMALE | Stage IA   | M0 |
| TCGA-AN-A049-01 | 9.406 | 62 | FEMALE | Stage IIA  | M0 |
| TCGA-C8-A1HG-01 | 9.403 | 50 | FEMALE | Stage IIA  | M0 |
| TCGA-BH-A18F-01 | 9.402 | 50 | FEMALE | Stage IIA  | M0 |
| TCGA-BH-A0HL-01 | 9.401 | 56 | FEMALE | Stage IIB  | M0 |
| TCGA-AR-A1AP-01 | 9.399 | 80 | FEMALE | Stage I    | M0 |
| TCGA-EW-A1P7-01 | 9.393 | 59 | FEMALE | Stage IIA  | M0 |
| TCGA-AR-A0TY-01 | 9.393 | 54 | FEMALE | Stage IIA  | M0 |
| TCGA-E9-A22D-01 | 9.392 | 38 | FEMALE | Stage IIA  | M0 |
| TCGA-AC-A23H-11 | 9.385 | 90 | FEMALE | Stage IIA  |    |
| TCGA-D8-A1XS-01 | 9.38  | 48 | MALE   | Stage IIIC | M0 |
| TCGA-BH-A8FY-01 | 9.38  |    | FEMALE | Stage IA   |    |
| TCGA-E2-A1L7-11 | 9.377 | 40 | FEMALE | Stage IIIA |    |
| TCGA-BH-A0HP-01 | 9.375 | 65 | FEMALE | Stage IIIA | M0 |
| TCGA-LL-A5YL-01 | 9.369 |    | FEMALE | Stage IIB  |    |
| TCGA-AR-A1AM-01 | 9.367 |    | FEMALE | Stage IIIA |    |
| TCGA-A7-A13H-01 | 9.367 |    | FEMALE | Stage IIB  |    |
| TCGA-E9-A1N9-01 | 9.366 | 58 | FEMALE | Stage IIA  | M0 |
| TCGA-BH-A0H6-01 | 9.365 | 82 | FEMALE | Stage I    | M0 |
| TCGA-B6-A409-01 | 9.364 |    | FEMALE | Stage IIIA |    |
| TCGA-E9-A1RF-01 | 9.363 | 68 | FEMALE | Stage IIIA | M0 |
| TCGA-BH-A1EW-01 | 9.362 | 38 | FEMALE | Stage IIA  | M0 |

|                      |         |    |        |               |    |
|----------------------|---------|----|--------|---------------|----|
| TCGA-AC-A5XS-01      | 9.362   |    | FEMALE | Stage IIA     |    |
| TCGA-A7-A3J1-01      | 9.36    |    | FEMALE | Stage IA      |    |
| TCGA-D8-A1JN-01      | 9.356   | 80 | FEMALE | Stage IIIC    | M0 |
| TCGA-A8-A0AB-01      | 9.356   | 54 | FEMALE | Stage IIA     | M0 |
| TCGA-C8-A1HO-01      | 9.356   | 34 | FEMALE | Stage IIIC    | M0 |
| TCGA-AR-A0U4-01      | 9.355   | 54 | FEMALE | Stage IIA     | M0 |
| TCGA-D8-A1JJ-01      | 9.352   | 54 | FEMALE | Stage IIA     | M0 |
| TCGA-C8-A1HL-01      | 9.351   | 38 | FEMALE | Stage IIIA    | M0 |
| TCGA-BH-A1FL-01      | 9.35 69 |    | FEMALE | Stage IIB     | M0 |
| TCGA-A7-A5ZW-01      | 9.35    |    | FEMALE | Stage IIA     |    |
| TCGA-A2-A4RW-01      | 9.349   |    | FEMALE | Stage IIIC    |    |
| TCGA-C8-A8HP-01      | 9.347   |    | FEMALE | Stage IIIA    |    |
| TCGA-AR-A1AX-01      | 9.342   | 64 | FEMALE | Stage I       | M0 |
| TCGA-A2-A0CQ-01      | 9.341   | 62 | FEMALE | Stage IA      | M0 |
| TCGA-GM-A2DC-01      | 9.341   | 57 | FEMALE | Stage IIA     |    |
| TCGA-BH-A0DV-11      | 9.34 54 |    | FEMALE | Stage IIIA    |    |
| TCGA-A2-A0T3-01      | 9.34 37 |    | FEMALE | Stage IB      | M0 |
| TCGA-D8-A1XV-01      | 9.337   | 84 | FEMALE | Stage IIA     | M0 |
| TCGA-B6-A0X7-01      | 9.337   | 62 | FEMALE | Stage X       |    |
| TCGA-BH-A202-01      | 9.337   | 60 | FEMALE | Stage II      |    |
| TCGA-A8-A08Z-01      | 9.336   | 76 | FEMALE | [Discrepancy] | M0 |
| TCGA-AN-A0XN-01      | 9.331   | 68 | FEMALE | Stage IIIA    | M0 |
| TCGA-E2-A1B4-01      | 9.33 74 |    | FEMALE | Stage IIIA    | M0 |
| TCGA-E2-A14T-01      | 9.33 52 |    | FEMALE | Stage IIA     | M0 |
| TCGA-BH-A0BG-01      | 9.329   | 73 | FEMALE | Stage I       | M0 |
| TCGA-LL-A6FR-01      | 9.329   |    | FEMALE | Stage IIA     |    |
| TCGA-A7-A13F-11      | 9.325   | 44 | FEMALE | Stage IIIA    |    |
| TCGA-AR-A0TQ-01      | 9.325   | 27 | FEMALE | Stage IIIA    | M0 |
| TCGA-A2-A0YF-01      | 9.323   | 67 | FEMALE | Stage I       | M0 |
| TCGA-A7-A4SB-01      | 9.321   |    | FEMALE | Stage IIIA    |    |
| TCGA-E9-A1R4-01      | 9.319   | 66 | FEMALE | Stage IA      | M0 |
| TCGA-E2-A11F-019.318 | 74      |    | FEMALE | Stage I       | M0 |
| TCGA-BH-A0DQ-11      | 9.318   | 42 | FEMALE | Stage IIB     |    |
| TCGA-OL-A5RY-01      | 9.317   |    | FEMALE | Stage IIA     |    |
| TCGA-A8-A06Y-01      | 9.315   | 66 | FEMALE | Stage IIA     | M0 |
| TCGA-BH-A0B2-01      | 9.314   | 43 |        |               | M0 |
| TCGA-AO-A0J4-01      | 9.314   | 41 | FEMALE | Stage IA      | M0 |
| TCGA-AC-A62Y-01      | 9.312   |    | FEMALE | Stage IIB     |    |
| TCGA-BH-A0BC-11      | 9.311   | 60 | FEMALE | Stage IIIC    |    |
| TCGA-BH-A0W7-01      | 9.309   | 49 | FEMALE | Stage I       | M0 |
| TCGA-E2-A14O-01      | 9.307   | 76 | FEMALE | Stage IIIA    | M0 |
| TCGA-D8-A27K-01      | 9.307   | 47 | FEMALE | Stage IIB     | M0 |
| TCGA-E2-A14U-01      | 9.305   |    | FEMALE | Stage I       |    |
| TCGA-BH-A18Q-01      | 9.304   | 56 | FEMALE | Stage IIB     | M0 |

|                 |         |    |        |            |    |
|-----------------|---------|----|--------|------------|----|
| TCGA-A7-A2KD-01 | 9.299   |    | FEMALE | Stage IIIA |    |
| TCGA-A2-A0SW-01 | 9.297   | 82 | FEMALE | Stage IV   | M1 |
| TCGA-B6-A0I5-01 | 9.297   | 49 | FEMALE | Stage IIB  | M0 |
| TCGA-E9-A228-01 | 9.295   | 58 | FEMALE | Stage IIB  | M0 |
| TCGA-C8-A132-01 | 9.295   | 56 | FEMALE | Stage IIB  | M0 |
| TCGA-BH-A1FC-11 | 9.294   | 78 | FEMALE | Stage IIA  |    |
| TCGA-D8-A1JT-01 | 9.29 70 |    | FEMALE | Stage IIA  | M0 |
| TCGA-BH-A0B8-01 | 9.29 64 |    | FEMALE | Stage I    | M0 |
| TCGA-EW-A1OZ-01 | 9.288   | 56 | FEMALE | Stage IIA  | M0 |
| TCGA-BH-A1F0-01 | 9.284   | 80 | FEMALE | Stage IIA  | M0 |
| TCGA-BH-A0DT-11 | 9.284   | 41 | FEMALE | Stage IIA  |    |
| TCGA-A8-A084-01 | 9.282   | 81 | FEMALE | Stage IIB  | M0 |
| TCGA-A7-A0CE-01 | 9.28 57 |    | FEMALE | Stage IIA  | M0 |
| TCGA-D8-A1JD-01 | 9.28 41 |    | FEMALE | Stage IIB  | M0 |
| TCGA-C8-A138-01 | 9.278   | 54 | FEMALE | Stage IIIA | M0 |
| TCGA-LL-A9Q3-01 | 9.278   |    | FEMALE | Stage IIIC |    |
| TCGA-AC-A4ZE-01 | 9.276   |    | FEMALE | Stage IIB  |    |
| TCGA-GM-A5PX-01 | 9.275   |    | FEMALE | Stage IIB  |    |
| TCGA-D8-A27M-01 | 9.274   | 59 | FEMALE | Stage IA   | M0 |
| TCGA-E2-A1LB-01 | 9.274   | 41 | FEMALE | Stage IIB  | M0 |
| TCGA-BH-A0W3-01 | 9.272   | 58 | FEMALE | Stage IIA  | M0 |
| TCGA-GM-A2DN-01 | 9.271   | 58 | FEMALE | Stage IIA  |    |
| TCGA-A2-A0CL-01 | 9.271   | 37 | FEMALE | Stage IIIA | M0 |
| TCGA-3C-AALI-01 | 9.269   |    | FEMALE | Stage IIB  |    |
| TCGA-A7-A0D9-01 | 9.268   | 37 | FEMALE | Stage IIA  | M0 |
| TCGA-C8-A12N-01 | 9.264   | 58 | FEMALE | Stage IIA  | M0 |
| TCGA-GM-A2DM-01 | 9.264   | 57 | FEMALE | Stage IIA  |    |
| TCGA-B6-A0RS-01 | 9.264   | 38 | FEMALE | Stage IIA  | M0 |
| TCGA-A8-A09V-01 | 9.263   | 51 | FEMALE | Stage IIA  | M0 |
| TCGA-D8-A142-01 | 9.26 74 |    | FEMALE | Stage IIB  | M0 |
| TCGA-A7-A425-01 | 9.258   |    | FEMALE | Stage IIIC |    |
| TCGA-E2-A105-01 | 9.255   | 79 | FEMALE | Stage IIA  | M0 |
| TCGA-E9-A1RC-01 | 9.254   | 56 | FEMALE | Stage IIIC | M0 |
| TCGA-A7-A5ZV-01 | 9.25    |    | FEMALE | Stage IIA  |    |
| TCGA-LL-A50Y-01 | 9.249   |    | FEMALE | Stage IIA  |    |
| TCGA-EW-A1P6-01 | 9.247   | 64 | FEMALE | Stage IIB  | M0 |
| TCGA-A2-A0YG-01 | 9.247   | 63 | FEMALE | Stage IIIC | M0 |
| TCGA-A8-A09D-01 | 9.246   | 47 | FEMALE | Stage IIB  | M0 |
| TCGA-A8-A06X-01 | 9.245   | 77 | FEMALE | Stage IIB  | M0 |
| TCGA-EW-A1IY-01 | 9.243   | 38 | FEMALE | Stage I    | M0 |
| TCGA-AR-A2LJ-01 | 9.24    |    | FEMALE | Stage IIIA |    |
| TCGA-AC-A2FF-11 | 9.236   |    | FEMALE | Stage IIB  |    |
| TCGA-BH-A0H5-01 | 9.235   | 45 | FEMALE | Stage I    | M0 |
| TCGA-AR-A0TS-01 | 9.234   | 46 | FEMALE | Stage IIB  | M0 |

|                      |       |    |        |            |    |
|----------------------|-------|----|--------|------------|----|
| TCGA-AO-A124-01      | 9.234 | 38 | FEMALE | Stage IIA  | M0 |
| TCGA-LL-A73Y-01      | 9.234 |    | FEMALE | Stage IA   |    |
| TCGA-LL-A5YP-01      | 9.234 |    | FEMALE | Stage IIB  |    |
| TCGA-E2-A15I-119.233 | 44    |    | FEMALE | Stage IIA  |    |
| TCGA-E2-A1LE-01      | 9.233 |    | FEMALE | Stage IIIC |    |
| TCGA-A8-A07U-01      | 9.23  | 66 | FEMALE | Stage IIIA | M0 |
| TCGA-A8-A0A2-01      | 9.227 | 66 | FEMALE | Stage IIA  | M0 |
| TCGA-AN-A041-01      | 9.226 | 29 | FEMALE | Stage IIB  | M0 |
| TCGA-E2-A15F-01      | 9.225 | 64 | FEMALE | Stage I    | M0 |
| TCGA-AO-A128-01      | 9.225 | 61 | FEMALE | Stage IIA  | M0 |
| TCGA-E2-A1B0-01      | 9.225 | 50 | FEMALE | Stage IIIA | M0 |
| TCGA-BH-A1F6-01      | 9.223 | 51 | FEMALE |            |    |
| TCGA-E2-A15E-01      | 9.223 | 40 | FEMALE | Stage IIA  | M0 |
| TCGA-BH-A1ET-01      | 9.222 | 55 | FEMALE | Stage I    | M0 |
| TCGA-A2-A0CK-01      | 9.222 |    | FEMALE | Stage IIIA |    |
| TCGA-E2-A153-11      | 9.22  | 51 | FEMALE | Stage IIB  |    |
| TCGA-E2-A1LS-01      | 9.219 | 46 | FEMALE | Stage IA   | M0 |
| TCGA-AO-A03O-01      | 9.217 | 69 | FEMALE | Stage IIA  | M0 |
| TCGA-EW-A423-01      | 9.217 |    | FEMALE | Stage IIA  |    |
| TCGA-D8-A73W-01      | 9.201 |    | FEMALE | Stage IIIA |    |
| TCGA-A7-A13E-01      | 9.198 | 62 | FEMALE | Stage IIB  | M0 |
| TCGA-BH-A0AU-01      | 9.197 | 45 | FEMALE | Stage IIA  | M0 |
| TCGA-BH-A18R-01      | 9.196 | 50 | FEMALE | Stage IIA  | M0 |
| TCGA-B6-A0WV-01      | 9.195 | 67 | FEMALE | Stage IIB  | M0 |
| TCGA-E9-A226-01      | 9.195 | 45 | FEMALE | Stage IIIA | M0 |
| TCGA-E9-A22B-01      | 9.193 | 71 | FEMALE | Stage IA   | M0 |
| TCGA-E2-A1LH-11      | 9.193 | 59 | FEMALE | Stage I    |    |
| TCGA-E9-A1NF-01      | 9.186 | 60 | FEMALE | Stage IIA  | M0 |
| TCGA-BH-A1ET-11      | 9.186 | 55 | FEMALE | Stage I    |    |
| TCGA-D8-A141-01      | 9.186 | 40 | FEMALE |            | M0 |
| TCGA-BH-A203-11      | 9.184 | 78 | FEMALE | Stage IIB  |    |
| TCGA-BH-A0DL-11      | 9.184 | 64 | FEMALE | Stage IIA  |    |
| TCGA-AC-A5XU-01      | 9.184 |    | FEMALE | Stage IIB  |    |
| TCGA-D8-A1XF-01      | 9.182 | 45 | FEMALE | Stage IIA  | M0 |
| TCGA-E9-A1N3-01      | 9.177 | 70 | FEMALE | Stage IIIA | M0 |
| TCGA-A7-A3J0-01      | 9.177 |    | FEMALE | Stage IIA  |    |
| TCGA-AC-A3W5-01      | 9.176 |    | FEMALE | Stage IIA  |    |
| TCGA-E2-A10F-01      | 9.175 | 47 | FEMALE | Stage IIA  | M0 |
| TCGA-D8-A73U-01      | 9.175 |    | FEMALE | Stage IIA  |    |
| TCGA-BH-A0EE-01      | 9.174 | 68 | FEMALE | Stage IIB  | M0 |
| TCGA-B6-A40B-01      | 9.174 |    | FEMALE | Stage I    |    |
| TCGA-A7-A56D-01      | 9.171 |    | FEMALE | Stage IIA  |    |
| TCGA-E2-A15G-01      | 9.17  | 76 | FEMALE | Stage IIA  | M0 |
| TCGA-A8-A08F-01      | 9.168 | 59 | FEMALE | Stage IIIC | M0 |

|                 |         |    |        |              |    |
|-----------------|---------|----|--------|--------------|----|
| TCGA-C8-A3M8-01 | 9.167   |    | FEMALE | Stage IA     |    |
| TCGA-BH-A1F8-11 | 9.165   | 90 | FEMALE | Stage IIIB   |    |
| TCGA-A8-A06T-01 | 9.165   | 75 | FEMALE | Stage IIIA   | M0 |
| TCGA-AC-A2FF-01 | 9.164   |    | FEMALE | Stage IIB    |    |
| TCGA-A7-A26H-01 | 9.163   | 72 | FEMALE | Stage IIA M0 |    |
| TCGA-BH-A18S-11 | 9.158   | 79 | FEMALE | Stage I      |    |
| TCGA-AN-A0XR-01 | 9.157   | 55 | FEMALE | Stage IIIA   | M0 |
| TCGA-AQ-A1H2-01 | 9.152   | 84 | FEMALE | Stage IIIA   | M0 |
| TCGA-GI-A2C9-01 | 9.149   |    | FEMALE | Stage IIB    |    |
| TCGA-E2-A570-01 | 9.147   |    | FEMALE | Stage IB     |    |
| TCGA-A2-A0CX-01 | 9.146   | 52 | FEMALE | Stage IIA M0 |    |
| TCGA-AR-A1AT-01 | 9.144   | 62 | FEMALE | Stage IIA M0 |    |
| TCGA-C8-A1HN-01 | 9.14 56 |    | FEMALE | Stage IIA M0 |    |
| TCGA-E2-A1L9-01 | 9.139   | 40 | FEMALE | Stage IIA M0 |    |
| TCGA-A7-A0CE-11 | 9.138   | 57 | FEMALE | Stage IIA    |    |
| TCGA-C8-A275-01 | 9.137   | 56 | FEMALE | Stage IIA M0 |    |
| TCGA-A2-A04N-01 | 9.134   | 66 | FEMALE | Stage IA M0  |    |
| TCGA-A8-A06Q-01 | 9.132   | 63 | FEMALE | Stage IIIA   | M0 |
| TCGA-EW-A1PD-01 | 9.125   | 61 | MALE   | Stage IIA M0 |    |
| TCGA-A2-A1G6-01 | 9.124   | 50 | FEMALE | Stage IIIA   | M0 |
| TCGA-B6-A0RI-01 | 9.124   | 44 | FEMALE | Stage IIIBM0 |    |
| TCGA-E9-A24A-01 | 9.123   | 69 | FEMALE | Stage IIA M0 |    |
| TCGA-BH-A0H7-11 | 9.12 65 |    | FEMALE | Stage IIIA   |    |
| TCGA-E9-A1RB-11 | 9.114   | 40 | FEMALE | Stage IIA    |    |
| TCGA-D8-A1XG-01 | 9.113   | 86 | FEMALE | Stage IIIBM0 |    |
| TCGA-B6-A0RV-01 | 9.113   | 42 | FEMALE | Stage IIIA   | M0 |
| TCGA-BH-A0DO-01 | 9.111   | 78 | FEMALE | Stage I      | M0 |
| TCGA-B6-A0X5-01 | 9.108   | 61 | FEMALE | Stage IIB M0 |    |
| TCGA-E2-A15L-01 | 9.106   | 65 | FEMALE | Stage IIA M0 |    |
| TCGA-AR-A1AS-01 | 9.105   | 54 | FEMALE | Stage IIB M0 |    |
| TCGA-E9-A1N9-11 | 9.104   | 58 | FEMALE | Stage IIA    |    |
| TCGA-BH-A0HK-01 | 9.103   | 81 | FEMALE | Stage IIB M0 |    |
| TCGA-A7-A0DC-11 | 9.102   | 63 | FEMALE | Stage IA     |    |
| TCGA-A7-A13G-11 | 9.101   | 79 | FEMALE | Stage IIA    |    |
| TCGA-BH-A0HB-01 | 9.1 55  |    | FEMALE | Stage IA M0  |    |
| TCGA-BH-A1FM-11 | 9.097   | 44 | FEMALE | Stage IIIA   |    |
| TCGA-B6-A0RQ-01 | 9.096   | 68 | FEMALE | Stage IIB M0 |    |
| TCGA-E2-A155-01 | 9.093   | 58 | FEMALE | Stage IIB M0 |    |
| TCGA-AC-A2FK-01 | 9.092   |    | FEMALE | Stage IIIC   |    |
| TCGA-BH-A0BM-11 | 9.091   | 54 | FEMALE | Stage IIB    |    |
| TCGA-E9-A1RD-01 | 9.089   | 67 | FEMALE | Stage IIA M0 |    |
| TCGA-AN-A0FW-01 | 9.087   | 67 | FEMALE | Stage IIIA   | M0 |
| TCGA-B6-A1KC-01 | 9.084   | 67 | FEMALE | Stage IIB M0 |    |
| TCGA-AC-A5EH-01 | 9.083   |    | FEMALE | Stage IIB    |    |

|                      |       |    |        |              |    |
|----------------------|-------|----|--------|--------------|----|
| TCGA-D8-A1XY-01      | 9.082 | 74 | FEMALE | Stage IIA M0 |    |
| TCGA-BH-A18N-01      | 9.081 | 88 | FEMALE | Stage IIA M0 |    |
| TCGA-E2-A10A-01      | 9.079 | 41 | FEMALE | Stage IIB M0 |    |
| TCGA-A8-A09K-01      | 9.075 | 68 | FEMALE | Stage IIA M0 |    |
| TCGA-E2-A159-01      | 9.075 | 50 | FEMALE | Stage IIA M0 |    |
| TCGA-AR-A5QN-01      | 9.075 |    | FEMALE | Stage IIIC   |    |
| TCGA-E9-A1ND-11      | 9.073 | 75 | FEMALE | Stage IIB    |    |
| TCGA-AR-A0U2-01      | 9.073 | 47 | FEMALE | Stage IIIA   | M0 |
| TCGA-E9-A22A-01      | 9.072 | 74 | FEMALE | Stage IIA M0 |    |
| TCGA-BH-A18J-11      | 9.072 | 56 | FEMALE | Stage IV     |    |
| TCGA-AO-A03T-01      | 9.071 | 42 | FEMALE | Stage IIB M0 |    |
| TCGA-A2-A0T5-01      | 9.069 | 39 | FEMALE | Stage IIA M0 |    |
| TCGA-BH-A1FD-11      | 9.068 | 68 | FEMALE | Stage I      |    |
| TCGA-BH-A0W4-01      | 9.067 | 46 | FEMALE | Stage IIA M0 |    |
| TCGA-BH-A0RX-01      | 9.064 | 59 | FEMALE | Stage IIA M0 |    |
| TCGA-E2-A1IE-019.062 | 61    |    | FEMALE | Stage IIB M0 |    |
| TCGA-A1-A0SF-01      | 9.061 | 54 | FEMALE | Stage IIA M0 |    |
| TCGA-A8-A085-01      | 9.061 | 44 | MALE   | Stage IIB M0 |    |
| TCGA-AC-A2FM-11      | 9.055 |    | FEMALE | Stage IIB    |    |
| TCGA-AN-A0AS-01      | 9.053 | 70 | FEMALE | Stage IIIA   | M0 |
| TCGA-AR-A250-01      | 9.051 | 58 | FEMALE | Stage IIA M0 |    |
| TCGA-AN-A0AM-01      | 9.051 | 56 | FEMALE | Stage IIA M0 |    |
| TCGA-AC-A2BK-01      | 9.05  |    | FEMALE | Stage IIIA   |    |
| TCGA-A2-A3KC-01      | 9.047 |    | FEMALE | Stage IIB    |    |
| TCGA-BH-A1FU-11      | 9.046 | 44 | FEMALE | Stage IA     |    |
| TCGA-E2-A10E-01      | 9.043 | 64 | FEMALE | Stage IIA M0 |    |
| TCGA-A8-A0A4-01      | 9.042 | 73 | FEMALE | Stage IIA M0 |    |
| TCGA-A8-A08X-01      | 9.04  | 43 | FEMALE | Stage IIIC   | M0 |
| TCGA-BH-A0C1-01      | 9.039 | 61 | FEMALE | Stage IIIA   | M0 |
| TCGA-A2-A04X-01      | 9.037 | 34 | FEMALE | Stage IIA M0 |    |
| TCGA-B6-A0WZ-01      | 9.034 | 50 | FEMALE | Stage II     | M0 |
| TCGA-EW-A6SD-01      | 9.033 |    | FEMALE | Stage IIB    |    |
| TCGA-E9-A1QZ-01      | 9.031 | 61 | FEMALE | Stage IIA M0 |    |
| TCGA-E2-A3DX-01      | 9.03  |    | FEMALE | Stage IIIC   |    |
| TCGA-AO-A0JD-01      | 9.029 | 59 | FEMALE | Stage IIIA   | M0 |
| TCGA-A7-A3RF-01      | 9.027 |    | FEMALE | Stage IIA    |    |
| TCGA-BH-A203-01      | 9.026 | 78 | FEMALE | Stage IIB    |    |
| TCGA-BH-A6R9-01      | 9.025 |    | FEMALE | Stage IIA    |    |
| TCGA-A8-A09X-01      | 9.022 | 62 | FEMALE | Stage IIIC   | M0 |
| TCGA-BH-A209-11      | 9.021 | 77 | FEMALE | Stage I      |    |
| TCGA-C8-A12P-01      | 9.02  | 55 | FEMALE | Stage IIB M0 |    |
| TCGA-E2-A2P6-01      | 9.02  |    | FEMALE | Stage IIB    |    |
| TCGA-C8-A133-01      | 9.019 | 65 | FEMALE | Stage IIIA   | M0 |
| TCGA-BH-A0BV-11      | 9.016 | 78 | FEMALE | Stage IIB    |    |

|                 |       |    |        |               |    |
|-----------------|-------|----|--------|---------------|----|
| TCGA-AR-A24Z-01 | 9.016 | 57 | FEMALE | Stage IIA     | M0 |
| TCGA-C8-A273-01 | 9.015 | 29 | FEMALE | Stage IIB     | M0 |
| TCGA-BH-A2L8-01 | 9.015 |    | FEMALE | Stage IIA     |    |
| TCGA-A8-A06O-01 | 9.014 | 60 | FEMALE | Stage I       | M0 |
| TCGA-A2-A4S1-01 | 9.014 |    | FEMALE | Stage IIA     |    |
| TCGA-E2-A15O-01 | 9.013 | 89 | FEMALE | Stage I       | M0 |
| TCGA-D8-A1X6-01 | 9.013 | 80 | FEMALE | Stage IIIA    | M0 |
| TCGA-C8-A12U-01 | 9.011 | 46 | FEMALE | Stage IIB     | M0 |
| TCGA-AC-A2QJ-01 | 9.011 |    | FEMALE | Stage IIIB    |    |
| TCGA-B6-A0IP-01 | 9.009 | 74 | FEMALE | Stage IA      | M0 |
| TCGA-BH-A1FR-11 | 9.007 | 73 | FEMALE | Stage IIIB    |    |
| TCGA-D8-A3Z6-01 | 9.004 |    | FEMALE | Stage IIIC    |    |
| TCGA-OL-A5DA-01 | 9.002 |    | FEMALE | Stage IIA     |    |
| TCGA-A7-A4SC-01 | 8.999 |    | FEMALE | Stage IIB     |    |
| TCGA-AR-A24N-01 | 8.996 | 54 | FEMALE | Stage I       | M0 |
| TCGA-BH-A18U-11 | 8.992 | 72 | FEMALE | Stage IIIA    |    |
| TCGA-A8-A07F-01 | 8.992 | 65 | FEMALE | Stage IIB     | M0 |
| TCGA-BH-A0H3-01 | 8.991 | 46 | FEMALE | Stage I       | M0 |
| TCGA-E9-A1N6-01 | 8.988 | 52 | FEMALE | Stage IIB     | M0 |
| TCGA-EW-A1P4-01 | 8.986 | 43 | FEMALE | Stage IIA     | M0 |
| TCGA-B6-A0RU-01 | 8.982 | 49 | FEMALE | Stage IA      | M0 |
| TCGA-A2-A0YK-01 | 8.978 | 61 | FEMALE | Stage IIA     | M0 |
| TCGA-S3-A6ZG-01 | 8.975 |    | FEMALE | Stage IIB     |    |
| TCGA-AR-A1AO-01 | 8.973 | 47 | FEMALE | Stage IIA     | M0 |
| TCGA-BH-A0DP-11 | 8.972 | 60 | FEMALE | Stage IIB     |    |
| TCGA-E9-A245-01 | 8.97  | 47 | FEMALE | Stage IIB     | M0 |
| TCGA-A2-A0T7-01 | 8.967 | 51 | FEMALE | Stage IIA     | M0 |
| TCGA-D8-A1J9-01 | 8.963 | 48 | FEMALE | Stage IA      | M0 |
| TCGA-B6-A0RL-01 | 8.962 | 60 | FEMALE | Stage IIA     | M0 |
| TCGA-A2-A25C-01 | 8.96  | 50 | FEMALE | Stage IIB     | M0 |
| TCGA-E2-A15K-11 | 8.958 | 58 | FEMALE | Stage IIB     |    |
| TCGA-OL-A66J-01 | 8.958 |    | FEMALE | Stage I       |    |
| TCGA-D8-A1XT-01 | 8.956 | 61 | FEMALE | Stage IIA     | M0 |
| TCGA-BH-A0HA-01 | 8.954 | 31 | FEMALE | Stage I       | M0 |
| TCGA-A8-A08I-01 | 8.95  | 53 | FEMALE | Stage IIA     | M0 |
| TCGA-AR-A1AN-01 | 8.95  | 46 | FEMALE | Stage IIA     | M0 |
| TCGA-EW-A1J2-01 | 8.945 | 50 | FEMALE | [Discrepancy] | M0 |
| TCGA-BH-A0BM-01 | 8.943 | 54 | FEMALE | Stage IIB     | M0 |
| TCGA-OL-A6VQ-01 | 8.943 |    | FEMALE | Stage IIA     |    |
| TCGA-A2-A4S2-01 | 8.942 |    | FEMALE | Stage IIIA    |    |
| TCGA-AR-A2LM-01 | 8.941 |    | FEMALE | Stage II      |    |
| TCGA-E9-A1ND-01 | 8.94  | 75 | FEMALE | Stage IIB     | M0 |
| TCGA-EW-A1P5-01 | 8.939 | 77 | FEMALE | Stage IIB     | M0 |
| TCGA-AR-A24P-01 | 8.939 | 47 | FEMALE | Stage I       | M0 |

|                 |        |      |        |            |    |
|-----------------|--------|------|--------|------------|----|
| TCGA-BH-A0HN-01 | 8.938  | 67   | FEMALE | Stage IA   | M0 |
| TCGA-AR-A24O-01 | 8.935  | 43   | FEMALE | Stage IIIA | M0 |
| TCGA-AN-A0FT-01 | 8.934  | 63   | FEMALE | Stage IIB  | M0 |
| TCGA-A2-A1G0-01 | 8.934  | 49   | FEMALE | Stage IIB  | M0 |
| TCGA-A2-A0YJ-01 | 8.932  | 39   | FEMALE | Stage IIIA | M0 |
| TCGA-A2-A0CV-01 | 8.9341 |      | FEMALE | Stage IIB  | M0 |
| TCGA-D8-A27E-01 | 8.926  | 66   | FEMALE | Stage IA   | M0 |
| TCGA-A8-A095-01 | 8.926  | 45   | FEMALE | Stage I    | M0 |
| TCGA-AR-A1AK-01 | 8.925  | 70   | FEMALE | Stage I    | M0 |
| TCGA-E9-A1RH-11 | 8.923  | 63   | FEMALE | Stage IIA  |    |
| TCGA-BH-A1FU-01 | 8.918  | 44   | FEMALE | Stage IA   | M0 |
| TCGA-BH-A0DH-11 | 8.916  | 63   | FEMALE | Stage IIB  |    |
| TCGA-D8-A27V-01 | 8.913  | 62   | FEMALE | Stage IIA  | M0 |
| TCGA-A7-A3IY-01 | 8.913  |      | FEMALE | Stage I    |    |
| TCGA-BH-A0BO-01 | 8.912  | 54   | FEMALE | Stage I    | M0 |
| TCGA-LL-A440-01 | 8.912  |      | FEMALE | Stage IA   |    |
| TCGA-BH-A0B4-01 | 8.9165 | MALE |        | Stage IIIA | M0 |
| TCGA-D8-A27I-01 | 8.907  | 58   | FEMALE | Stage IIIA | M0 |
| TCGA-BH-A0BT-11 | 8.905  | 56   | FEMALE | Stage IIA  |    |
| TCGA-C8-A12L-01 | 8.899  | 67   | FEMALE | Stage IIA  | M0 |
| TCGA-A8-A06U-01 | 8.897  | 80   | FEMALE | Stage IIB  | M0 |
| TCGA-E2-A1IN-01 | 8.894  | 60   | FEMALE | Stage I    | M0 |
| TCGA-BH-A18P-11 | 8.893  | 60   | FEMALE | Stage I    |    |
| TCGA-E9-A22H-01 | 8.893  | 42   | FEMALE | Stage IIB  | M0 |
| TCGA-AO-A12B-01 | 8.8963 |      | FEMALE | Stage IIA  | M0 |
| TCGA-A7-A26J-01 | 8.8949 |      | FEMALE | Stage IIA  | M0 |
| TCGA-E2-A1L6-01 | 8.887  | 44   | FEMALE | Stage IIA  | M0 |
| TCGA-E9-A1R6-01 | 8.886  | 63   | FEMALE | Stage IIA  | M0 |
| TCGA-B6-A0WT-01 | 8.885  | 61   | FEMALE | Stage IIB  | M0 |
| TCGA-AO-A03N-01 | 8.885  | 59   | FEMALE | Stage IIB  | M0 |
| TCGA-B6-A2IU-01 | 8.885  |      | FEMALE | Stage IIA  |    |
| TCGA-D8-A145-01 | 8.8880 |      | FEMALE | Stage IIA  | M0 |
| TCGA-A2-A0YH-01 | 8.877  | 53   | FEMALE | Stage IIIA | M0 |
| TCGA-A8-A08L-01 | 8.873  | 89   | FEMALE | Stage IIIA | M0 |
| TCGA-AR-A24Q-01 | 8.8749 |      | FEMALE | Stage IIB  | M0 |
| TCGA-D8-A1JB-01 | 8.869  | 54   | FEMALE | Stage IIB  | M0 |
| TCGA-AR-A2LN-01 | 8.869  |      | FEMALE | Stage IIA  |    |
| TCGA-GM-A2DI-01 | 8.867  | 52   | FEMALE | Stage I    |    |
| TCGA-A8-A081-01 | 8.865  | 80   | FEMALE | Stage IIA  | M0 |
| TCGA-A2-A0D3-01 | 8.865  | 42   | FEMALE | Stage IA   | M0 |
| TCGA-D8-A27L-01 | 8.862  | 49   | FEMALE | Stage IIIA | M0 |
| TCGA-E9-A5UO-01 | 8.862  |      | FEMALE | Stage IIA  |    |
| TCGA-D8-A140-01 | 8.858  | 62   | FEMALE | Stage IIB  | M0 |
| TCGA-LL-A442-01 | 8.858  |      | FEMALE | Stage IIA  |    |

|                 |         |    |        |            |    |
|-----------------|---------|----|--------|------------|----|
| TCGA-A2-A0EY-01 | 8.857   | 62 | FEMALE | Stage IIB  | M0 |
| TCGA-AO-A0J3-01 | 8.855   | 67 | FEMALE | Stage IIB  | M0 |
| TCGA-A2-A0CZ-01 | 8.855   | 46 | FEMALE | Stage IIA  | M0 |
| TCGA-E2-A15D-01 | 8.851   | 47 | FEMALE | Stage IIA  | M0 |
| TCGA-A8-A0AD-01 | 8.85 83 |    | FEMALE | Stage I    | M0 |
| TCGA-EW-A6S9-01 | 8.85    |    | FEMALE | Stage IIA  |    |
| TCGA-E9-A1NH-01 | 8.841   | 71 | FEMALE | Stage IIB  | M0 |
| TCGA-A8-A08H-01 | 8.83 66 |    | FEMALE | Stage IIA  | M0 |
| TCGA-D8-A146-01 | 8.828   | 57 | FEMALE | Stage IIA  | M0 |
| TCGA-BH-A0AY-01 | 8.827   | 62 | FEMALE | Stage IIA  | M0 |
| TCGA-A8-A09G-01 | 8.826   | 79 | FEMALE | Stage IIIC | M0 |
| TCGA-AR-A1AU-01 | 8.824   | 39 | FEMALE | Stage IIIA | M0 |
| TCGA-AC-A2FG-01 | 8.819   |    | FEMALE | Stage IIB  |    |
| TCGA-AR-A2LH-01 | 8.818   |    | FEMALE | Stage III  |    |
| TCGA-B6-A0IC-01 | 8.815   | 90 | FEMALE | Stage X    |    |
| TCGA-E2-A1BD-01 | 8.814   | 53 | FEMALE | Stage IIA  | M0 |
| TCGA-A2-A0ET-01 | 8.812   | 58 | FEMALE | Stage IIIA | M0 |
| TCGA-BH-A0H0-01 | 8.811   | 69 | FEMALE | Stage IA   | M0 |
| TCGA-AR-A252-01 | 8.811   | 50 | FEMALE | Stage I    | M0 |
| TCGA-A8-A086-01 | 8.809   | 59 | FEMALE | Stage IIA  | M0 |
| TCGA-A1-A0SO-01 | 8.806   | 67 | FEMALE | Stage IIB  | M0 |
| TCGA-C8-A12O-01 | 8.806   | 50 | FEMALE | Stage IIA  | M0 |
| TCGA-A2-A0T1-01 | 8.804   | 55 | FEMALE | Stage IIIC | M0 |
| TCGA-B6-A1KF-01 | 8.802   | 68 | FEMALE | Stage IIB  | M0 |
| TCGA-EW-A1OY-01 | 8.801   | 63 | FEMALE | Stage IIA  | M0 |
| TCGA-BH-A1F6-11 | 8.801   | 51 | FEMALE |            |    |
| TCGA-D8-A1J8-01 | 8.796   | 77 | FEMALE | Stage IIB  | M0 |
| TCGA-A2-A0SU-01 | 8.794   | 66 | FEMALE | Stage IIA  | M0 |
| TCGA-BH-A0B2-11 | 8.79 43 |    |        |            |    |
| TCGA-E9-A1RD-11 | 8.788   | 67 | FEMALE | Stage IIA  |    |
| TCGA-LQ-A4E4-01 | 8.788   |    | FEMALE | Stage IIIA |    |
| TCGA-E2-A107-01 | 8.785   | 54 | FEMALE | Stage IIIA | M0 |
| TCGA-AC-A2FM-01 | 8.783   |    | FEMALE | Stage IIB  |    |
| TCGA-BH-A18L-01 | 8.781   | 50 | FEMALE | Stage IIIA | M0 |
| TCGA-A8-A09A-01 | 8.78 40 |    | FEMALE | Stage X    | M0 |
| TCGA-BH-A0E9-01 | 8.772   | 53 | FEMALE | Stage IIB  | M0 |
| TCGA-E9-A1NA-11 | 8.771   | 58 | FEMALE | Stage IIA  |    |
| TCGA-A8-A090-01 | 8.769   | 74 | FEMALE | Stage IIA  | M0 |
| TCGA-A2-A0EO-01 | 8.769   | 54 | FEMALE | Stage IA   | M0 |
| TCGA-E2-A150-01 | 8.766   | 48 | FEMALE | Stage IIA  | M0 |
| TCGA-BH-A1FB-01 | 8.762   | 60 | FEMALE | Stage IIB  | M0 |
| TCGA-BH-A18N-11 | 8.761   | 88 | FEMALE | Stage IIA  |    |
| TCGA-BH-A0DP-01 | 8.753   | 60 | FEMALE | Stage IIB  | M0 |
| TCGA-A2-A25F-01 | 8.752   | 66 | FEMALE | Stage IIA  | M0 |

|                 |       |    |        |            |    |
|-----------------|-------|----|--------|------------|----|
| TCGA-B6-A0IN-01 | 8.75  | 45 | FEMALE | Stage X    |    |
| TCGA-A2-A3KD-01 | 8.746 |    | FEMALE | Stage IIIA |    |
| TCGA-A8-A094-01 | 8.742 | 75 | FEMALE | Stage IIA  | M0 |
| TCGA-A8-A06P-01 | 8.742 | 63 | FEMALE | Stage IIIA | M0 |
| TCGA-A8-A09B-01 | 8.742 | 58 | FEMALE | Stage IIIB | M0 |
| TCGA-A2-A0EN-01 | 8.737 | 70 | FEMALE | Stage IIA  | M0 |
| TCGA-E2-A156-01 | 8.735 | 61 | FEMALE | Stage I    | M0 |
| TCGA-E2-A1IJ-01 | 8.735 | 57 | FEMALE | Stage I    | M0 |
| TCGA-A7-A0CD-01 | 8.734 | 66 | FEMALE | Stage I    | M0 |
| TCGA-AO-A126-01 | 8.731 | 39 | FEMALE | Stage IIA  | M0 |
| TCGA-A8-A076-01 | 8.727 | 66 | FEMALE | Stage IIA  | M0 |
| TCGA-AC-A6IX-06 | 8.726 |    | FEMALE | Stage IIIC |    |
| TCGA-BH-A1FR-01 | 8.714 | 73 | FEMALE | Stage IIIB | M0 |
| TCGA-A2-A0CT-01 | 8.714 | 71 | FEMALE | Stage IIA  | M0 |
| TCGA-E9-A22E-01 | 8.713 | 56 | FEMALE | Stage IIIA | M0 |
| TCGA-AR-A1AL-01 | 8.71  | 60 | FEMALE | Stage IIIA | M0 |
| TCGA-EW-A1J5-01 | 8.71  | 59 | FEMALE | Stage IIB  | M0 |
| TCGA-BH-A0DZ-11 | 8.71  | 43 | FEMALE | Stage IIB  |    |
| TCGA-D8-A13Z-01 | 8.707 | 51 | FEMALE |            | M0 |
| TCGA-A8-A08G-01 | 8.705 | 41 | FEMALE | Stage IIA  | M0 |
| TCGA-E2-A1IO-01 | 8.705 | 37 | FEMALE | Stage I    | M0 |
| TCGA-BH-A1FJ-01 | 8.703 | 66 | FEMALE | Stage IIIA | M0 |
| TCGA-BH-A1F2-01 | 8.702 | 53 | FEMALE | Stage IIIB | M0 |
| TCGA-BH-A18J-01 | 8.699 | 56 | FEMALE | Stage IV   | M1 |
| TCGA-AR-A2LK-01 | 8.696 |    | FEMALE | Stage III  |    |
| TCGA-AQ-A04H-01 | 8.695 | 61 | FEMALE | Stage IIIA |    |
| TCGA-OL-A5D6-01 | 8.692 |    | FEMALE | Stage IIA  |    |
| TCGA-AN-A0AK-01 | 8.686 | 76 | FEMALE | Stage IIA  | M0 |
| TCGA-AO-A03P-01 | 8.685 | 54 | FEMALE | Stage IIB  | M0 |
| TCGA-A2-A0YI-01 | 8.681 | 62 | FEMALE | Stage I    | M0 |
| TCGA-BH-A18M-11 | 8.681 | 39 | FEMALE | Stage IIIA |    |
| TCGA-AR-A24W-01 | 8.681 |    | FEMALE | Stage IIB  |    |
| TCGA-A2-A4S0-01 | 8.678 |    | FEMALE | Stage IIA  |    |
| TCGA-AO-A12H-01 | 8.674 | 69 | FEMALE | Stage IIA  | M0 |
| TCGA-AO-A1KT-01 | 8.672 | 78 | FEMALE | Stage IIA  | M0 |
| TCGA-PE-A5DE-01 | 8.672 |    | FEMALE | Stage IIA  |    |
| TCGA-E2-A108-01 | 8.66  | 64 | FEMALE | Stage IIIA | M0 |
| TCGA-D8-A1X8-01 | 8.66  | 62 | FEMALE | Stage IIIA | M0 |
| TCGA-E2-A1IG-01 | 8.659 | 45 | FEMALE | Stage IIB  | M0 |
| TCGA-BH-A0AV-01 | 8.657 | 52 | FEMALE | Stage I    | M0 |
| TCGA-BH-A0E0-11 | 8.655 | 38 | FEMALE | Stage IIIC |    |
| TCGA-LL-A6FP-01 | 8.651 |    | FEMALE | Stage IIA  |    |
| TCGA-C8-A12Z-01 | 8.648 | 45 | FEMALE | Stage IIB  | M0 |
| TCGA-AN-A0FF-01 | 8.648 | 32 | FEMALE | Stage IA   | M0 |

|                 |         |    |        |            |    |
|-----------------|---------|----|--------|------------|----|
| TCGA-BH-A1FG-01 | 8.647   | 88 | FEMALE | Stage I    | M0 |
| TCGA-D8-A1JS-01 | 8.645   | 77 | FEMALE | Stage IA   | M0 |
| TCGA-BH-A0BZ-01 | 8.645   | 59 | FEMALE | Stage IIIA | M0 |
| TCGA-GM-A5PV-01 | 8.639   |    | FEMALE | Stage IIB  |    |
| TCGA-A2-A0YC-01 | 8.634   | 59 | FEMALE | Stage IIB  | M0 |
| TCGA-D8-A1JL-01 | 8.633   | 72 | FEMALE | Stage IIA  | M0 |
| TCGA-B6-A0WS-01 | 8.631   | 58 | FEMALE | Stage X    | M0 |
| TCGA-BH-A0AY-11 | 8.629   | 62 | FEMALE | Stage IIA  |    |
| TCGA-AC-A2FB-11 | 8.626   |    | FEMALE | Stage IIA  |    |
| TCGA-D8-A1XO-01 | 8.623   | 56 | FEMALE | Stage IIB  | M0 |
| TCGA-E9-A1R5-01 | 8.62 63 |    | FEMALE | Stage IA   | M0 |
| TCGA-A2-A0CO-01 | 8.617   |    | FEMALE | Stage IIB  |    |
| TCGA-E2-A15P-01 | 8.616   | 61 | FEMALE | Stage IA   | M0 |
| TCGA-AC-A6IX-01 | 8.613   |    | FEMALE | Stage IIIC |    |
| TCGA-D8-A1JA-01 | 8.609   | 60 | FEMALE |            | M0 |
| TCGA-BH-A1EN-11 | 8.608   | 78 | FEMALE | Stage IIA  |    |
| TCGA-A8-A08J-01 | 8.608   | 52 | FEMALE | Stage IV   | M1 |
| TCGA-AR-A0U3-01 | 8.603   | 59 | FEMALE | Stage IIB  | M0 |
| TCGA-D8-A27R-01 | 8.603   | 41 | FEMALE | Stage IIIC | M0 |
| TCGA-BH-A1F0-11 | 8.6 80  |    | FEMALE | Stage IIA  |    |
| TCGA-AC-A2FO-01 | 8.6     |    | FEMALE | Stage IIB  |    |
| TCGA-D8-A27H-01 | 8.599   | 72 | FEMALE | Stage IIA  | M0 |
| TCGA-E9-A1NE-01 | 8.597   | 28 | FEMALE | Stage IIB  | M0 |
| TCGA-A8-A091-01 | 8.593   | 61 | FEMALE | Stage IIA  | M0 |
| TCGA-E2-A153-01 | 8.59 51 |    | FEMALE | Stage IIB  | M0 |
| TCGA-C8-A26V-01 | 8.589   | 47 | FEMALE | Stage IIIA | M0 |
| TCGA-BH-A0BL-01 | 8.587   | 35 | FEMALE | Stage I    | M0 |
| TCGA-BH-A1F2-11 | 8.585   | 53 | FEMALE | Stage IIIB |    |
| TCGA-BH-A1FH-11 | 8.585   | 47 | FEMALE | Stage IV   |    |
| TCGA-D8-A1JH-01 | 8.582   | 56 | FEMALE | Stage IA   | M0 |
| TCGA-AR-A5QM-01 | 8.581   |    | FEMALE | Stage IIA  |    |
| TCGA-E2-A14Q-01 | 8.58 50 |    | FEMALE | Stage IIB  | M0 |
| TCGA-E2-A15C-01 | 8.574   | 61 | FEMALE | Stage I    | M0 |
| TCGA-LL-A740-01 | 8.574   |    | FEMALE | Stage IA   |    |
| TCGA-C8-A1HK-01 | 8.572   | 53 | FEMALE | Stage IIB  | M0 |
| TCGA-B6-A0I9-01 | 8.571   | 62 | FEMALE | Stage IV   | M1 |
| TCGA-E2-A1IG-11 | 8.562   | 45 | FEMALE | Stage IIB  |    |
| TCGA-E9-A5UP-01 | 8.558   |    | FEMALE | Stage IIA  |    |
| TCGA-BH-A0HY-01 | 8.555   | 60 | FEMALE | Stage I    | M0 |
| TCGA-BH-A18S-01 | 8.55 79 |    | FEMALE | Stage I    | M0 |
| TCGA-A2-A0ES-01 | 8.547   | 52 | FEMALE | Stage IIA  | M0 |
| TCGA-AO-A12D-01 | 8.545   | 43 | FEMALE | Stage IIA  | M0 |
| TCGA-A8-A07S-01 | 8.544   | 73 | FEMALE | Stage IIA  | M0 |
| TCGA-A8-A083-01 | 8.539   | 67 | FEMALE | Stage IIB  | M0 |

|                 |        |    |        |            |    |
|-----------------|--------|----|--------|------------|----|
| TCGA-E9-A1R3-01 | 8.538  | 70 | FEMALE | Stage IIIC | M0 |
| TCGA-AR-A0TR-01 | 8.538  | 68 | FEMALE | Stage IIB  | M0 |
| TCGA-C8-A1HI-01 | 8.537  | 40 | FEMALE | Stage IIIA | M0 |
| TCGA-AR-A0TV-01 | 8.535  | 66 | FEMALE | Stage IIA  | M0 |
| TCGA-AC-A2FB-01 | 8.531  |    | FEMALE | Stage IIA  |    |
| TCGA-AO-A03V-01 | 8.5341 |    | FEMALE | Stage I    | M0 |
| TCGA-GI-A2C9-11 | 8.528  |    | FEMALE | Stage IIB  |    |
| TCGA-B6-A0IM-01 | 8.525  | 75 | FEMALE | Stage IIB  | M0 |
| TCGA-AR-A24T-01 | 8.524  | 46 | FEMALE | Stage IIIC | M0 |
| TCGA-C8-A8HQ-01 | 8.524  |    | FEMALE | Stage IIB  |    |
| TCGA-A7-A3IZ-01 | 8.523  |    | FEMALE | Stage IIA  |    |
| TCGA-E2-A572-01 | 8.519  |    | FEMALE | Stage IIIA |    |
| TCGA-BH-A0DQ-01 | 8.516  | 42 | FEMALE | Stage IIB  | M0 |
| TCGA-A2-A0EX-01 | 8.511  | 46 | FEMALE | Stage IIB  | M0 |
| TCGA-GM-A2DK-01 | 8.508  | 58 | FEMALE | Stage I    |    |
| TCGA-A8-A0A1-01 | 8.504  | 84 | FEMALE | Stage IIA  | M0 |
| TCGA-D8-A1JG-01 | 8.504  | 62 | FEMALE | Stage IIA  | M0 |
| TCGA-A2-A0SY-01 | 8.501  | 62 | FEMALE | Stage IIIA | M0 |
| TCGA-D8-A1XM-01 | 8.5    | 57 | FEMALE | Stage IA   | M0 |
| TCGA-BH-A0C3-01 | 8.499  | 47 | FEMALE | Stage I    | M0 |
| TCGA-AQ-A1H3-01 | 8.497  | 49 | FEMALE | Stage IIIC | M0 |
| TCGA-AN-A0FZ-01 | 8.497  | 45 | FEMALE | Stage IIIA | M0 |
| TCGA-AR-A24U-01 | 8.4947 |    | FEMALE | Stage IIA  | M0 |
| TCGA-A8-A0A6-01 | 8.489  | 64 | FEMALE | Stage IIIC | M0 |
| TCGA-AO-A0J5-01 | 8.489  | 48 | FEMALE | Stage IV   | M1 |
| TCGA-BH-A208-01 | 8.489  | 48 | FEMALE | Stage IIB  |    |
| TCGA-AN-A0AL-01 | 8.486  | 41 | FEMALE | Stage IIIB | M0 |
| TCGA-E2-A15K-01 | 8.4858 |    | FEMALE | Stage IIB  | M0 |
| TCGA-BH-A18L-11 | 8.479  | 50 | FEMALE | Stage IIIA |    |
| TCGA-AO-A0JJ-01 | 8.477  | 54 | FEMALE | Stage IIB  | M0 |
| TCGA-B6-A0RN-01 | 8.472  | 60 | FEMALE | Stage IA   | M0 |
| TCGA-A2-A1G4-01 | 8.468  | 71 | FEMALE | Stage IIIA | M0 |
| TCGA-EW-A2FV-01 | 8.468  | 39 | FEMALE | Stage IIIC |    |
| TCGA-E9-A1RF-11 | 8.465  | 68 | FEMALE | Stage IIIA |    |
| TCGA-E9-A227-01 | 8.465  | 42 | FEMALE | Stage IIB  | M0 |
| TCGA-A8-A07E-01 | 8.463  | 81 | FEMALE | Stage X    | M0 |
| TCGA-A7-A0CG-01 | 8.4678 |    | FEMALE | Stage IIA  | M0 |
| TCGA-E9-A1R7-11 | 8.452  | 64 | FEMALE | Stage IIA  |    |
| TCGA-BH-A0DX-01 | 8.452  | 62 | FEMALE | Stage I    | M0 |
| TCGA-D8-A1JC-01 | 8.4559 |    | FEMALE | Stage IIIA | M0 |
| TCGA-BH-A0HF-01 | 8.449  | 77 | FEMALE | Stage IA   | M0 |
| TCGA-BH-A0BV-01 | 8.444  | 78 | FEMALE | Stage IIB  | M0 |
| TCGA-D8-A27P-01 | 8.441  | 64 | FEMALE | Stage IA   | M0 |
| TCGA-BH-A0B0-01 | 8.441  | 56 | FEMALE | Stage I    | M0 |

|                 |          |        |               |               |
|-----------------|----------|--------|---------------|---------------|
| TCGA-A2-A0YD-01 | 8.44 63  | FEMALE | Stage IIB M0  |               |
| TCGA-EW-A2FR-01 | 8.438    | FEMALE | Stage IIIC    |               |
| TCGA-BH-A0DG-01 | 8.437    | 30     | FEMALE        | Stage IIA M0  |
| TCGA-AC-A23E-01 | 8.434    | 50     | FEMALE        | Stage IIB M0  |
| TCGA-C8-A26Y-01 | 8.428    | 90     | FEMALE        | Stage IIA M0  |
| TCGA-AO-A0JM-01 | 8.427    | 40     | FEMALE        | Stage IIB M0  |
| TCGA-A8-A09W-01 | 8.412    | 70     | FEMALE        | Stage IIIBM0  |
| TCGA-E2-A1IL-01 | 8.407 78 | FEMALE | Stage IIA M0  |               |
| TCGA-AC-A23G-01 | 8.405    | FEMALE | Stage IIA     |               |
| TCGA-AO-A0JI-01 | 8.401    | 56     | FEMALE        | Stage IIA M0  |
| TCGA-B6-A0RG-01 | 8.394    | 26     | FEMALE        | Stage IIB M0  |
| TCGA-BH-A0BR-01 | 8.393    | 59     | FEMALE        | Stage I M0    |
| TCGA-BH-A0BA-11 | 8.392    | 51     | FEMALE        | Stage IIIC    |
| TCGA-A2-A0CS-01 | 8.385    | 73     | FEMALE        | Stage IV M1   |
| TCGA-B6-A0WY-01 | 8.384    | 40     | FEMALE        | Stage IIIA M0 |
| TCGA-E2-A15R-01 | 8.383    | 64     | FEMALE        | Stage IIA M0  |
| TCGA-A8-A09I-01 | 8.38 84  | FEMALE | Stage IIA M0  |               |
| TCGA-BH-A0DE-01 | 8.38 62  | FEMALE | Stage IIA M0  |               |
| TCGA-EW-A1P1-01 | 8.376    | 68     | FEMALE        | Stage IIIC M0 |
| TCGA-BH-A0BQ-01 | 8.375    | 39     | FEMALE        | Stage I M0    |
| TCGA-E9-A1RH-01 | 8.373    | 63     | FEMALE        | Stage IIA M0  |
| TCGA-A8-A08C-01 | 8.363    | 65     | FEMALE        | Stage IIA M0  |
| TCGA-BH-A6R8-01 | 8.361    | FEMALE | Stage IIA     |               |
| TCGA-A8-A08S-01 | 8.357    | 71     | FEMALE        | Stage IIA M0  |
| TCGA-AC-A3HN-01 | 8.357    | FEMALE | Stage IIB     |               |
| TCGA-AN-A0FS-01 | 8.354    | 55     | FEMALE        | Stage IA M0   |
| TCGA-D8-A1XC-01 | 8.351    | 85     | FEMALE        | Stage IIIBM0  |
| TCGA-E2-A15T-01 | 8.351    | 65     | FEMALE        | Stage IIA M0  |
| TCGA-BH-A0AZ-01 | 8.35 47  | FEMALE | Stage IIIA M0 |               |
| TCGA-AQ-A0Y5-01 | 8.349    | 70     | FEMALE        | Stage IIIA M0 |
| TCGA-AO-A0J8-01 | 8.343    | 61     | FEMALE        | Stage IIA M0  |
| TCGA-E9-A1R0-01 | 8.342    | 58     | FEMALE        | Stage IIA M0  |
| TCGA-AN-A0FN-01 | 8.341    | 61     | FEMALE        | Stage IA M0   |
| TCGA-EW-A1IX-01 | 8.34 48  | FEMALE | Stage IIA M0  |               |
| TCGA-BH-A0HO-01 | 8.338    | 48     | FEMALE        | Stage IIA M0  |
| TCGA-GI-A2C8-01 | 8.337    | FEMALE | Stage IIIB    |               |
| TCGA-GM-A3NW-01 | 8.333    | FEMALE | Stage IIA     |               |
| TCGA-B6-A0IB-01 | 8.329    | 64     | FEMALE        | Stage IV M1   |
| TCGA-BH-A0AW-01 | 8.325    | 56     | FEMALE        | Stage IIA M0  |
| TCGA-AN-A0FK-01 | 8.322    | 88     | FEMALE        | Stage IIIBM0  |
| TCGA-A1-A0SD-01 | 8.298    | 59     | FEMALE        | Stage IIA M0  |
| TCGA-D8-A1JK-01 | 8.297    | 90     | FEMALE        | Stage IIA M0  |
| TCGA-AR-A24V-01 | 8.296    | 52     | FEMALE        | Stage IIB M0  |
| TCGA-BH-A0DK-11 | 8.295    | 49     | FEMALE        | Stage IIA     |

|                      |        |    |        |            |    |
|----------------------|--------|----|--------|------------|----|
| TCGA-A8-A096-01      | 8.287  | 73 | FEMALE | Stage IIA  | M0 |
| TCGA-BH-A18P-01      | 8.285  | 60 | FEMALE | Stage I    | M0 |
| TCGA-BH-A0DK-01      | 8.285  | 49 | FEMALE | Stage IIA  | M0 |
| TCGA-D8-A1JF-01      | 8.284  | 79 | FEMALE | Stage IIIA | M0 |
| TCGA-BH-A0B1-01      | 8.281  | 66 | FEMALE | Stage IIB  | M0 |
| TCGA-BH-A0HX-01      | 8.281  | 54 | FEMALE | Stage IIB  | M0 |
| TCGA-D8-A1X5-01      | 8.276  | 81 | FEMALE | Stage IIIC | M0 |
| TCGA-BH-A0EA-01      | 8.274  | 72 | FEMALE | Stage IIA  | M0 |
| TCGA-B6-A0IH-01      | 8.2681 |    | FEMALE | Stage IIIA | M0 |
| TCGA-A8-A06Z-01      | 8.259  | 84 | FEMALE | Stage IIB  | M0 |
| TCGA-D8-A1XJ-01      | 8.256  | 76 | FEMALE | Stage IIIA | M0 |
| TCGA-AN-A0XS-01      | 8.256  | 63 | FEMALE | Stage IIIA | M0 |
| TCGA-A8-A07J-01      | 8.253  | 35 | FEMALE | Stage IIB  | M0 |
| TCGA-AR-A24R-01      | 8.251  | 45 | FEMALE | Stage IIIA | M0 |
| TCGA-A1-A0SN-01      | 8.247  | 50 | FEMALE | Stage IIA  | M0 |
| TCGA-E2-A158-11      | 8.238  | 43 | FEMALE | Stage IIA  |    |
| TCGA-A7-A0CH-01      | 8.236  | 79 | FEMALE | Stage IIA  | M0 |
| TCGA-A8-A07B-01      | 8.234  | 69 | FEMALE | Stage IIA  | M0 |
| TCGA-BH-A1EO-01      | 8.233  | 68 | FEMALE | Stage IIA  | M0 |
| TCGA-A2-A1FZ-01      | 8.233  | 63 | FEMALE | Stage IIA  | M0 |
| TCGA-E9-A1NG-11      | 8.232  | 62 | FEMALE | Stage IIA  |    |
| TCGA-C8-A26Z-01      | 8.2359 |    | FEMALE | Stage IIA  | M0 |
| TCGA-AR-A1AV-01      | 8.229  | 68 | MALE   | Stage IIB  | M0 |
| TCGA-AO-A0JF-01      | 8.227  | 68 | FEMALE | Stage IIA  | M0 |
| TCGA-AC-A23C-01      | 8.223  | 62 | FEMALE | Stage IIB  | M0 |
| TCGA-EW-A1PE-01      | 8.223  | 56 | FEMALE | Stage IIA  | M0 |
| TCGA-PL-A8LX-01      | 8.223  |    | FEMALE | Stage IV   |    |
| TCGA-A1-A0SE-01      | 8.217  | 56 | FEMALE | Stage I    | M0 |
| TCGA-A8-A08A-01      | 8.216  | 89 | FEMALE | Stage I    | M0 |
| TCGA-A7-A13G-01      | 8.212  | 79 | FEMALE | Stage IIA  | M0 |
| TCGA-BH-A0EB-01      | 8.202  | 69 | FEMALE | Stage IA   | M0 |
| TCGA-C8-A12X-01      | 8.199  | 62 | FEMALE | Stage IIB  | M0 |
| TCGA-C8-A1HE-01      | 8.197  | 59 | FEMALE | Stage IIA  | M0 |
| TCGA-A1-A0SI-01      | 8.196  | 52 | FEMALE | Stage IIB  | M0 |
| TCGA-C8-A12Q-01      | 8.195  | 78 | FEMALE | Stage IIIA | M0 |
| TCGA-E9-A1NG-01      | 8.192  | 62 | FEMALE | Stage IIA  | M0 |
| TCGA-AO-A12E-01      | 8.189  | 51 | FEMALE | Stage IIB  | M0 |
| TCGA-BH-A0HQ-01      | 8.186  | 56 | FEMALE | Stage IIA  | M0 |
| TCGA-B6-A0IA-01      | 8.183  | 51 | FEMALE | Stage IIA  | M0 |
| TCGA-A8-A097-01      | 8.181  | 65 | FEMALE | Stage IIB  | M0 |
| TCGA-E2-A1IK-018.177 | 71     |    | FEMALE | Stage IIA  | M0 |
| TCGA-E9-A1RI-11      | 8.177  | 43 | FEMALE | Stage IIIA |    |
| TCGA-A8-A09T-01      | 8.174  | 68 | FEMALE | Stage X    | M0 |
| TCGA-A2-A0T2-01      | 8.171  | 66 | FEMALE | Stage IV   | M1 |

|                 |       |    |        |               |    |
|-----------------|-------|----|--------|---------------|----|
| TCGA-A7-A0D9-11 | 8.168 | 37 | FEMALE | Stage IIA     |    |
| TCGA-A2-A0T6-01 | 8.163 | 50 | FEMALE | Stage IIB     | M0 |
| TCGA-BH-A0DS-01 | 8.161 | 71 | FEMALE | Stage IIIA    | M0 |
| TCGA-A2-A0YT-01 | 8.158 | 56 | FEMALE | Stage IIIB    | M0 |
| TCGA-BH-A0E7-01 | 8.154 | 79 | FEMALE | Stage IIB     | M0 |
| TCGA-AO-A03U-01 | 8.146 | 31 | FEMALE | Stage I       | M0 |
| TCGA-BH-A1FH-01 | 8.145 | 47 | FEMALE | Stage IV      | M1 |
| TCGA-AN-A0XW-01 | 8.141 | 36 | FEMALE | Stage IIIA    | M0 |
| TCGA-A7-A0CH-11 | 8.14  | 79 | FEMALE | Stage IIA     |    |
| TCGA-AR-A0TX-01 | 8.132 | 64 | FEMALE | Stage IIA     | M0 |
| TCGA-BH-A0BC-01 | 8.132 | 60 | FEMALE | Stage IIIC    | M0 |
| TCGA-A2-A0EW-01 | 8.132 | 53 | FEMALE | Stage IIIC    | M0 |
| TCGA-D8-A1XW-01 | 8.128 | 53 | FEMALE | Stage IIA     | M0 |
| TCGA-A7-A0DB-01 | 8.116 | 56 | FEMALE | Stage IIA     | M0 |
| TCGA-A8-A07G-01 | 8.113 | 65 | FEMALE | Stage IIA     | M0 |
| TCGA-B6-A0RP-01 | 8.112 | 73 | FEMALE | [Discrepancy] | M0 |
| TCGA-EW-A1PF-01 | 8.112 | 50 | FEMALE | Stage IA      | M0 |
| TCGA-BH-A0BZ-11 | 8.102 | 59 | FEMALE | Stage IIIA    |    |
| TCGA-BH-A0DI-01 | 8.098 | 63 | FEMALE | Stage IIB     | M0 |
| TCGA-D8-A1JU-01 | 8.094 | 51 | FEMALE | Stage IA      | M0 |
| TCGA-D8-A1JE-01 | 8.092 | 62 | FEMALE | Stage IIA     | M0 |
| TCGA-A8-A06N-01 | 8.09  | 66 | FEMALE | Stage IIIB    | M0 |
| TCGA-A8-A0A7-01 | 8.085 | 57 | FEMALE | Stage IIB     | M0 |
| TCGA-B6-A0WW-01 | 8.075 | 58 | FEMALE | Stage X       |    |
| TCGA-A2-A0EM-01 | 8.059 | 73 | FEMALE | Stage IA      | M0 |
| TCGA-BH-A1EX-01 | 8.059 | 67 | FEMALE | Stage IIB     | M0 |
| TCGA-A8-A07W-01 | 8.049 | 76 | FEMALE | Stage IV      | M1 |
| TCGA-AO-A03M-01 | 8.049 | 29 | FEMALE | Stage I       | M0 |
| TCGA-A1-A0SQ-01 | 8.047 | 45 | FEMALE | Stage IIB     | M0 |
| TCGA-E2-A106-01 | 8.044 | 34 | FEMALE | Stage IB      | M0 |
| TCGA-BH-A0BA-01 | 8.04  | 51 | FEMALE | Stage IIIC    | M0 |
| TCGA-AO-A0JG-01 | 8.039 | 49 | FEMALE | Stage IIIA    | M0 |
| TCGA-LL-A5YM-01 | 8.03  |    | FEMALE | Stage IIIB    |    |
| TCGA-A7-A13F-01 | 8.029 | 44 | FEMALE | Stage IIIA    | M0 |
| TCGA-A7-A26E-01 | 8.026 | 71 | FEMALE | Stage IIIA    | M0 |
| TCGA-A8-A099-01 | 8.022 | 76 | FEMALE | Stage X       | M0 |
| TCGA-AN-A0XP-01 | 8.021 | 69 | FEMALE | Stage IIIA    | M0 |
| TCGA-S3-A6ZH-01 | 8.011 |    | FEMALE | Stage IIIC    |    |
| TCGA-BH-A1F8-01 | 7.999 | 90 | FEMALE | Stage IIIB    | M0 |
| TCGA-BH-A0H9-01 | 7.996 | 69 | FEMALE | Stage IIA     | M0 |
| TCGA-A2-A0EV-01 | 7.989 | 80 | FEMALE | Stage IA      | M0 |
| TCGA-BH-A0DZ-01 | 7.982 | 43 | FEMALE | Stage IIB     | M0 |
| TCGA-A8-A082-01 | 7.969 | 58 | FEMALE | Stage IIB     | M0 |
| TCGA-E9-A1RC-11 | 7.969 | 56 | FEMALE | Stage IIIC    |    |

|                 |       |    |        |            |    |
|-----------------|-------|----|--------|------------|----|
| TCGA-A2-A0CU-01 | 7.968 | 73 | FEMALE | Stage IIA  | M0 |
| TCGA-AR-A2LQ-01 | 7.96  |    | FEMALE | Stage IIB  |    |
| TCGA-D8-A1XU-01 | 7.94  | 56 | FEMALE | Stage IA   | M0 |
| TCGA-BH-A0BJ-01 | 7.94  | 41 | FEMALE | Stage IIB  | M0 |
| TCGA-BH-A204-11 | 7.933 | 80 | FEMALE | Stage IIB  |    |
| TCGA-E2-A1BC-01 | 7.929 | 63 | FEMALE | Stage IA   | M0 |
| TCGA-AN-A0FL-01 | 7.929 | 62 | FEMALE | Stage IIA  | M0 |
| TCGA-BH-A0E1-01 | 7.929 | 52 | FEMALE | Stage IIB  | M0 |
| TCGA-D8-A27W-01 | 7.922 | 55 | FEMALE | Stage IIIB | M0 |
| TCGA-AO-A0JA-01 | 7.92  | 36 | FEMALE | Stage IIIC | M0 |
| TCGA-A7-A13E-11 | 7.919 | 62 | FEMALE | Stage IIB  |    |
| TCGA-BH-A0BW-01 | 7.917 | 71 | FEMALE | Stage I    | M0 |
| TCGA-E9-A1R7-01 | 7.915 | 64 | FEMALE | Stage IIA  | M0 |
| TCGA-A1-A0SG-01 | 7.901 | 61 | FEMALE | Stage IIB  | M0 |
| TCGA-BH-A0EI-01 | 7.882 | 51 | FEMALE | Stage IIA  | M0 |
| TCGA-AN-A0FV-01 | 7.878 | 58 | FEMALE | Stage IIA  | M0 |
| TCGA-E2-A1LS-11 | 7.878 | 46 | FEMALE | Stage IA   |    |
| TCGA-D8-A1X7-01 | 7.847 | 40 | FEMALE | Stage IIA  | M0 |
| TCGA-AC-A2FE-01 | 7.839 |    | FEMALE | Stage IIIC |    |
| TCGA-AR-A24M-01 | 7.838 | 38 | FEMALE | Stage IIIA | M0 |
| TCGA-A8-A09Z-01 | 7.837 | 83 | FEMALE | Stage IIB  | M0 |
| TCGA-A2-A04W-01 | 7.833 | 50 | FEMALE | Stage IIB  | M0 |
| TCGA-E2-A1IU-01 | 7.825 | 60 | FEMALE | Stage IA   | M0 |
| TCGA-BH-A1FE-06 | 7.82  | 31 | FEMALE | Stage IIB  |    |
| TCGA-EW-A1IW-01 | 7.813 | 80 | FEMALE | Stage IIB  | M0 |
| TCGA-A8-A093-01 | 7.796 | 61 | FEMALE | Stage IIA  | M0 |
| TCGA-D8-A27G-01 | 7.785 | 75 | FEMALE | Stage IIA  | M0 |
| TCGA-E2-A10B-01 | 7.784 | 67 | FEMALE | Stage IIB  | M0 |
| TCGA-EW-A1OX-01 | 7.777 | 43 | FEMALE | Stage IIA  | M0 |
| TCGA-BH-A0B7-01 | 7.777 | 42 | FEMALE | Stage IIB  | M0 |
| TCGA-BH-A0B5-11 | 7.774 | 40 | FEMALE | Stage IIIA |    |
| TCGA-BH-A0HK-11 | 7.771 | 81 | FEMALE | Stage IIB  |    |
| TCGA-E2-A15M-11 | 7.768 | 66 | FEMALE | Stage IIA  |    |
| TCGA-B6-A1KI-01 | 7.765 | 63 | FEMALE | Stage I    | M0 |
| TCGA-C8-A12W-01 | 7.749 | 49 | FEMALE | Stage IIIB | M0 |
| TCGA-E2-A15K-06 | 7.747 | 58 | FEMALE | Stage IIB  |    |
| TCGA-AC-A3EH-01 | 7.745 |    | FEMALE | Stage IIIC |    |
| TCGA-BH-A1EO-11 | 7.743 | 68 | FEMALE | Stage IIA  |    |
| TCGA-AC-A2QI-01 | 7.743 |    | FEMALE | Stage IIIA |    |
| TCGA-BH-A0GZ-01 | 7.734 | 62 | FEMALE | Stage IIA  | M0 |
| TCGA-A2-A0T4-01 | 7.71  | 62 | FEMALE | Stage IIA  | M0 |
| TCGA-AR-A0TW-01 | 7.704 | 50 | FEMALE | Stage IIIA | M0 |
| TCGA-A7-A0DB-11 | 7.677 | 56 | FEMALE | Stage IIA  |    |
| TCGA-BH-A0DD-11 | 7.675 | 58 | MALE   | Stage IIB  |    |

|                      |         |    |        |            |    |
|----------------------|---------|----|--------|------------|----|
| TCGA-BH-A0BD-01      | 7.673   | 47 | FEMALE | Stage IIA  | M0 |
| TCGA-BH-A0H9-11      | 7.665   | 69 | FEMALE | Stage IIA  |    |
| TCGA-E9-A1NF-11      | 7.664   | 60 | FEMALE | Stage IIA  |    |
| TCGA-BH-A0BP-01      | 7.645   | 76 | FEMALE | Stage I    | M0 |
| TCGA-A1-A0SJ-01      | 7.633   | 39 | FEMALE | Stage IIIA | M0 |
| TCGA-A2-A0ER-01      | 7.619   | 63 | FEMALE | Stage IB   | M0 |
| TCGA-BH-A0DH-01      | 7.584   | 63 | FEMALE | Stage IIB  | M0 |
| TCGA-A8-A09R-01      | 7.582   | 82 | FEMALE | Stage IIB  | M0 |
| TCGA-E2-A152-01      | 7.58 56 |    | FEMALE | Stage I    | M0 |
| TCGA-A1-A0SH-01      | 7.577   | 39 | FEMALE | Stage IIA  | M0 |
| TCGA-BH-A0H7-01      | 7.553   | 65 | FEMALE | Stage IIIA | M0 |
| TCGA-BH-A0B8-11      | 7.54 64 |    | FEMALE | Stage I    |    |
| TCGA-BH-A0B6-01      | 7.513   |    | FEMALE | Stage I    |    |
| TCGA-AC-A23H-01      | 7.51 90 |    | FEMALE | Stage IIA  | M0 |
| TCGA-A8-A07P-01      | 7.5 68  |    | FEMALE | Stage IIB  | M0 |
| TCGA-B6-A0IK-01      | 7.47 63 |    | FEMALE | Stage IIIB | M0 |
| TCGA-A1-A0SM-01      | 7.416   | 77 | MALE   | Stage IIA  | M0 |
| TCGA-AN-A04A-01      | 7.41 36 |    | FEMALE | Stage IIIA | M0 |
| TCGA-AR-A24L-01      | 7.389   | 26 | FEMALE | Stage IIB  | M0 |
| TCGA-BH-A0DV-01      | 7.382   | 54 | FEMALE | Stage IIIA | M0 |
| TCGA-A8-A07Z-01      | 7.359   | 85 | FEMALE | Stage IIA  | M0 |
| TCGA-AO-A12G-01      | 7.298   | 75 | FEMALE | Stage IIA  | M0 |
| TCGA-D8-A1JI-017.225 | 54      |    | FEMALE | Stage IIA  | M0 |
| TCGA-BH-A0HI-01      | 7.213   | 78 | FEMALE | Stage IA   | M0 |
| TCGA-D8-A143-01      | 7.108   | 51 | FEMALE | Stage IIA  | M0 |
| TCGA-BH-A1EN-01      | 6.997   | 78 | FEMALE | Stage IIA  | M0 |
| TCGA-GI-A2C8-11      | 6.979   |    | FEMALE | Stage IIIB |    |
| TCGA-B6-A0RO-01      | 6.715   | 71 | FEMALE | Stage IIIB | M0 |
| TCGA-AN-A03X-01      | 6.517   | 74 | FEMALE | Stage IIA  | M0 |
| TCGA-BH-A0BS-01      | 6.497   | 55 | FEMALE | Stage IIIA | M0 |
| TCGA-A8-A09E-01      | 6.351   | 73 | FEMALE | Stage IIIB | M0 |
| TCGA-BH-A1EY-11      | 79      |    | FEMALE | Stage IIA  |    |
| TCGA-E2-A1IF-11      | 74      |    | FEMALE | Stage I    |    |
| TCGA-E9-A1NH-11      | 71      |    | FEMALE | Stage IIB  |    |
| TCGA-E2-A15L-11      | 65      |    | FEMALE | Stage IIA  |    |
| TCGA-BH-A0DI-11      | 63      |    | FEMALE | Stage IIB  |    |
| TCGA-BH-A1F5-11      | 62      |    | FEMALE | Stage IIA  |    |
| TCGA-BH-A0DE-11      | 62      |    | FEMALE | Stage IIA  |    |
| TCGA-E2-A1LI-11      | 57      |    | FEMALE | Stage IIB  |    |
| TCGA-BH-A0BF-11      | 56      |    | FEMALE | Stage IIB  |    |
| TCGA-BH-A0BO-11      | 54      |    | FEMALE | Stage I    |    |
| TCGA-E2-A1II-11      | 51      |    | FEMALE | Stage I    |    |
| TCGA-BH-A18F-11      | 50      |    | FEMALE | Stage IIA  |    |
| TCGA-E9-A1N8-11      | 48      |    | FEMALE | Stage IIA  |    |

|                 |    |        |            |
|-----------------|----|--------|------------|
| TCGA-E2-A1B5-11 | 46 | FEMALE | Stage IIA  |
| TCGA-E2-A1IO-11 | 37 | FEMALE | Stage I    |
| TCGA-BH-A0BL-11 | 35 | FEMALE | Stage I    |
| TCGA-E2-A14Y-11 | 35 | FEMALE | Stage IIA  |
| TCGA-BH-A1ES-11 | 35 | FEMALE | Stage IIB  |
| TCGA-E9-A1NE-11 | 28 | FEMALE | Stage IIB  |
| TCGA-AC-A5EI-01 |    | FEMALE | Stage IB   |
| TCGA-A7-A4SE-11 |    | FEMALE | Stage IIA  |
| TCGA-A7-A4SD-11 |    | FEMALE | Stage IIA  |
| TCGA-XX-A899-11 |    | FEMALE | Stage IIIA |
| TCGA-C8-A9FZ-01 |    | FEMALE | Stage IIB  |
| TCGA-AC-A2FG-11 |    | FEMALE | Stage IIB  |
| TCGA-A7-A4SC-11 |    | FEMALE | Stage IIB  |
| TCGA-A7-A4SA-11 |    | FEMALE | Stage IIB  |
| TCGA-AN-A0FG-01 |    |        |            |
| TCGA-AN-A0FE-01 |    |        |            |
