# Supplementary material for: RETRACTED ARTICLE: Long noncoding RNA SNHG1 promotes TERT expression by sponging miR-18b-5p in breast cancer
Source: Springer Nature journal article supplement (doi:10.1186/s13578-021-00675-5), 2021-08-31
Supplement: MOESM5 [file 13578_2021_675_MOESM5_ESM.pdf]

| Inpatient number | Name | Subtypes | Age | T | N | M | TNM  | ER  | PR  | Her-2 | Ki-67 |
|------------------|------|----------|-----|---|---|---|------|-----|-----|-------|-------|
| 555233           | 钟德鑫  | Luminal  | 73  | 2 | 2 | 0 | IIIA | (+) | (+) | (2+)  | 8     |
| 510037           | 张亚茹  | HER-2    | 45  | 2 | 0 | 0 | IIIA | (-) | (-) | (3+)  | 20    |
| 613244           | 程淑英  | TNBC     | 61  | 1 | 3 | 0 | IIIC | (-) | (-) | (-)   | 60    |
| 620540           | 李静芬  | TNBC     | 61  | 3 | 2 | 0 | IIIA | (-) | (-) | (-)   | 90    |
| 610298           | 赵惠   | TNBC     | 41  | 2 | 2 | 0 | IIIA | (-) | (-) | (-)   | 60    |

TNBC: Triple negative breast cancer.
