# Supplementary material for: RETRACTED ARTICLE: Long noncoding RNA SNHG1 promotes TERT expression by sponging miR-18b-5p in breast cancer
Source: Springer Nature journal article supplement (doi:10.1186/s13578-021-00675-5), 2021-08-31
Supplement: MOESM8 [file 13578_2021_675_MOESM8_ESM.pdf]

## Targetscan

| Position in the<br>UTR | seed match        | context++ | context++ score | weighted           | conserved        | Pct |
|------------------------|-------------------|-----------|-----------------|--------------------|------------------|-----|
|                        |                   | score     | percentile      | context++<br>score | branch<br>length |     |
| 192-198                | 7mer-m8           | -0.02     | 28              | -0.02              | 5.744            | N/A |
| 192-198                | 7mer-m8           | -0.02     | 28              | -0.02              | 5.744            | N/A |
| 192-198                | 7mer-m8           | -0.02     | 27              | -0.02              | 5.744            | N/A |
| 192-198                | 7mer-m8           | -0.02     | 27              | -0.02              | 5.744            | N/A |
| 192-198                | 7mer-m8           | -0.02     | 25              | -0.02              | 5.744            | N/A |
| 192-198                | 7mer-m8           | -0.02     | 25              | -0.02              | 5.744            | N/A |
| 192-198                | 7mer-m8           | -0.02     | 23              | -0.02              | 5.744            | N/A |
| 195-201                | 7mer-1A           | -0.01     | 36              | -0.01              | 6.501            | N/A |
| 214-220                | 7mer-m8           | -0.03     | 51              | -0.03              | 5.754            | N/A |
| 411-417                | 7mer-1A           | -0.05     | 57              | -0.05              | 5.808            | N/A |
| 411-417                | 7mer-1A           | -0.05     | 57              | -0.05              | 5.808            | N/A |
| 498-504                | 7mer-m8           | -0.02     | 31              | -0.02              | 4.745            | N/A |
| 498-504                | 7mer-m8           | -0.02     | 29              | -0.02              | 4.745            | N/A |
| 498-504                | 7mer-m8           | -0.02     | 27              | -0.02              | 4.745            | N/A |
| 566-572                | 7mer-m8           | -0.02     | 40              | -0.02              | 2.938            | N/A |
| 626-632                | 7mer-m8           | -0.12     | 78              | -0.12              | 5.675            | N/A |
| 668-674                | 7mer-m8           | -0.02     | 42              | -0.02              | 3.297            | N/A |
| 786-793                | 8mer              | -0.03     | 48              | -0.03              | 5.087            | N/A |
| 15-21                  | 7mer-1A           | -0.12     | 77              | -0.12              | 0                | N/A |
| 15-21                  | 7mer-1A           | -0.04     | 39              | -0.04              | 0.017            | N/A |
| 16-22                  | 7mer-m8           | -0.08     | 67              | -0.08              | 0.017            | N/A |
| 17-23                  | 7mer-m8           | -0.15     | 83              | -0.15              | 0                | N/A |
| 19-26                  | 8mer              | -0.28     | 96              | -0.28              | 0                | N/A |
| 20-26                  | 7mer-1A           | -0.14     | 73              | -0.14              | 0.017            | N/A |
| 21-27                  | 7mer-m8           | -0.19     | 89              | -0.19              | 0.017            | N/A |
| 21-32                  | non-<br>canonical | N/A       | N/A             | N/A                | 0                | N/A |
| 21-32                  | non-<br>canonical | N/A       | N/A             | N/A                | 0                | N/A |
| 22-28                  | 7mer-m8           | -0.23     | 93              | -0.23              | 0                | N/A |
| 24-30                  | 7mer-m8           | -0.2      | 90              | -0.2               | 0.155            | N/A |
| 24-30                  | 7mer-m8           | -0.16     | 85              | -0.16              | 0.155            | N/A |
| 24-30                  | 7mer-m8           | -0.16     | 85              | -0.16              | 0.155            | N/A |
| 25-31                  | 7mer-m8           | -0.26     | 87              | -0.26              | 0                | N/A |
| 27-33                  | 7mer-m8           | -0.41     | 95              | -0.41              | 0                | N/A |
| 35-41                  | 7mer-m8           | -0.02     | 51              | -0.02              | 0                | N/A |
| 39-45                  | 7mer-m8           | -0.1      | 81              | -0.1               | 0.609            | N/A |
| 39-45                  | 7mer-m8           | -0.1      | 81              | -0.1               | 0.609            | N/A |

|         |           |       |     |       |       |     |
|---------|-----------|-------|-----|-------|-------|-----|
| 41-47   | 7mer-1A   | -0.01 | 50  | -0.01 | 0     | N/A |
| 41-47   | 7mer-m8   | -0.02 | 20  | -0.02 | 0     | N/A |
| 43-50   | 8mer      | -0.25 | 96  | -0.25 | 0     | N/A |
| 44-50   | 7mer-m8   | -0.02 | 39  | -0.02 | 0     | N/A |
| 44-50   | 7mer-1A   | -0.01 | 26  | -0.01 | 0     | N/A |
| 51-57   | 7mer-m8   | -0.05 | 49  | -0.05 | 0     | N/A |
| 56-62   | 7mer-m8   | -0.2  | 84  | -0.2  | 0     | N/A |
| 64-70   | 7mer-m8   | -0.06 | 49  | -0.06 | 0     | N/A |
| 65-72   | 8mer      | -0.19 | 95  | -0.19 | 0     | N/A |
| 66-72   | 7mer-1A   | -0.08 | 71  | -0.08 | 0     | N/A |
| 66-72   | 7mer-1A   | -0.07 | 67  | -0.07 | 0     | N/A |
| 66-72   | 7mer-1A   | -0.04 | 54  | -0.04 | 0     | N/A |
| 67-73   | 7mer-m8   | -0.1  | 88  | -0.1  | 0.017 | N/A |
| 67-73   | 7mer-m8   | -0.15 | 87  | -0.15 | 0.017 | N/A |
| 68-75   | 8mer      | -0.21 | 92  | -0.21 | 0.466 | N/A |
| 69-75   | 7mer-1A   | -0.01 | 35  | -0.01 | 0.145 | N/A |
| 83-90   | 8mer      | -0.19 | 92  | -0.19 | 0.155 | N/A |
| 97-103  | 7mer-1A   | -0.01 | 15  | -0.01 | 0     | N/A |
|         | non-      |       |     |       |       |     |
| 99-110  | canonical | N/A   | N/A | N/A   | 0     | N/A |
|         | non-      |       |     |       |       |     |
| 99-110  | canonical | N/A   | N/A | N/A   | 0     | N/A |
| 100-106 | 7mer-m8   | -0.09 | 81  | -0.09 | 0     | N/A |
| 104-111 | 8mer      | -0.3  | 97  | -0.3  | 1.026 | N/A |
| 112-118 | 7mer-m8   | -0.1  | 78  | -0.1  | 0.609 | N/A |
| 117-123 | 7mer-1A   | -0.02 | 52  | -0.02 | 0.083 | N/A |
| 121-127 | 7mer-m8   | -0.03 | 34  | -0.03 | 0     | N/A |
| 129-135 | 7mer-m8   | -0.13 | 81  | -0.13 | 0     | N/A |
| 130-136 | 7mer-m8   | -0.16 | 84  | -0.16 | 0     | N/A |
| 131-137 | 7mer-m8   | -0.19 | 87  | -0.19 | 0.615 | N/A |
| 131-137 | 7mer-m8   | -0.16 | 82  | -0.16 | 0.615 | N/A |
| 132-138 | 7mer-m8   | -0.27 | 97  | -0.27 | 0     | N/A |
| 132-138 | 7mer-m8   | -0.23 | 96  | -0.23 | 0     | N/A |
| 134-140 | 7mer-m8   | -0.02 | 45  | -0.02 | 0.145 | N/A |
| 137-143 | 7mer-m8   | -0.03 | 62  | -0.03 | 0     | N/A |
| 138-144 | 7mer-m8   | -0.06 | 57  | -0.06 | 0.017 | N/A |
| 152-158 | 7mer-1A   | -0.01 | 32  | -0.01 | 0     | N/A |
| 161-168 | 8mer      | -0.43 | 93  | -0.43 | 0     | N/A |
| 162-168 | 7mer-1A   | -0.23 | 77  | -0.23 | 0     | N/A |
| 169-175 | 7mer-m8   | -0.22 | 85  | -0.22 | 0.017 | N/A |
| 170-176 | 7mer-m8   | -0.15 | 77  | -0.15 | 0     | N/A |
| 176-182 | 7mer-m8   | -0.11 | 73  | -0.11 | 0     | N/A |
| 179-185 | 7mer-m8   | -0.17 | 82  | -0.17 | 0     | N/A |
| 180-186 | 7mer-m8   | -0.09 | 74  | -0.09 | 0.609 | N/A |

|         |           |       |     |       |       |     |
|---------|-----------|-------|-----|-------|-------|-----|
| 189-195 | 7mer-m8   | -0.02 | 59  | -0.02 | 0     | N/A |
| 190-196 | 7mer-m8   | -0.02 | 55  | -0.02 | 0.72  | N/A |
| 190-196 | 7mer-m8   | -0.02 | 46  | -0.02 | 0.72  | N/A |
| 190-196 | 7mer-m8   | -0.02 | 43  | -0.02 | 0.72  | N/A |
| 194-201 | 8mer      | -0.28 | 96  | -0.28 | 0     | N/A |
| 196-203 | 8mer      | -0.2  | 90  | -0.2  | 0     | N/A |
| 210-216 | 7mer-1A   | -0.13 | 81  | -0.13 | 0     | N/A |
| 210-216 | 7mer-1A   | -0.12 | 77  | -0.12 | 0     | N/A |
| 210-216 | 7mer-1A   | -0.11 | 74  | -0.11 | 0     | N/A |
| 216-222 | 7mer-1A   | -0.08 | 58  | -0.08 | 0     | N/A |
| 216-222 | 7mer-m8   | -0.04 | 46  | -0.04 | 0.145 | N/A |
| 217-224 | 8mer      | -0.14 | 92  | -0.14 | 0     | N/A |
| 218-224 | 7mer-1A   | -0.01 | 26  | -0.01 | 0     | N/A |
| 220-226 | 7mer-m8   | -0.09 | 74  | -0.09 | 0     | N/A |
| 222-228 | 7mer-1A   | -0.08 | 44  | -0.08 | 0.145 | N/A |
| 232-238 | 7mer-m8   | -0.12 | 83  | -0.12 | 0     | N/A |
| 239-245 | 7mer-m8   | -0.09 | 52  | -0.09 | 0     | N/A |
|         | non-      |       |     |       |       |     |
| 242-253 | canonical | N/A   | N/A | N/A   | 0     | N/A |
|         | non-      |       |     |       |       |     |
| 242-253 | canonical | N/A   | N/A | N/A   | 0     | N/A |
| 248-254 | 7mer-1A   | -0.14 | 69  | -0.14 | 0     | N/A |
| 248-254 | 7mer-1A   | -0.06 | 62  | -0.06 | 0     | N/A |
| 249-255 | 7mer-m8   | -0.12 | 77  | -0.12 | 0     | N/A |
| 250-257 | 8mer      | -0.13 | 72  | -0.13 | 0     | N/A |
| 250-257 | 8mer      | -0.07 | 70  | -0.07 | 0     | N/A |
| 251-257 | 7mer-1A   | -0.03 | 35  | -0.03 | 0     | N/A |
| 253-259 | 7mer-1A   | -0.02 | 50  | -0.02 | 0.499 | N/A |
| 256-263 | 8mer      | -0.31 | 94  | -0.31 | 1.08  | N/A |
| 257-263 | 7mer-m8   | -0.05 | 78  | -0.05 | 0     | N/A |
| 257-263 | 7mer-1A   | -0.14 | 78  | -0.14 | 0     | N/A |
| 258-264 | 7mer-m8   | -0.25 | 95  | -0.25 | 1.566 | N/A |
| 259-265 | 7mer-m8   | -0.13 | 74  | -0.13 | 0.145 | N/A |
| 261-267 | 7mer-m8   | -0.08 | 82  | -0.08 | 0     | N/A |
| 262-269 | 8mer      | -0.09 | 79  | -0.09 | 0     | N/A |
| 263-269 | 7mer-m8   | -0.02 | 53  | -0.02 | 0     | N/A |
| 263-269 | 7mer-m8   | -0.02 | 37  | -0.02 | 0     | N/A |
| 269-275 | 7mer-1A   | -0.02 | 45  | -0.02 | 2.99  | N/A |
| 270-276 | 7mer-1A   | -0.06 | 79  | -0.06 | 0     | N/A |
| 270-276 | 7mer-1A   | -0.07 | 65  | -0.07 | 0     | N/A |
| 275-281 | 7mer-m8   | -0.38 | 94  | -0.38 | 0     | N/A |
| 277-283 | 7mer-m8   | -0.45 | 93  | -0.45 | 0     | N/A |
| 281-288 | 8mer      | -0.15 | 83  | -0.15 | 0     | N/A |
| 281-287 | 7mer-1A   | -0.09 | 67  | -0.09 | 0     | N/A |

|         |         |       |    |       |       |     |
|---------|---------|-------|----|-------|-------|-----|
| 282-288 | 7mer-1A | -0.03 | 48 | -0.03 | 0     | N/A |
| 283-289 | 7mer-m8 | -0.02 | 58 | -0.02 | 0     | N/A |
| 288-294 | 7mer-m8 | -0.06 | 66 | -0.06 | 0     | N/A |
| 290-296 | 7mer-m8 | -0.1  | 81 | -0.1  | 0     | N/A |
| 293-300 | 8mer    | -0.28 | 93 | -0.28 | 0     | N/A |
| 294-300 | 7mer-1A | -0.12 | 84 | -0.12 | 0     | N/A |
| 294-300 | 7mer-1A | -0.17 | 83 | -0.17 | 0     | N/A |
| 295-302 | 8mer    | -0.14 | 82 | -0.14 | 0     | N/A |
| 307-313 | 7mer-m8 | -0.28 | 83 | -0.28 | 0.719 | N/A |
| 316-322 | 7mer-m8 | -0.02 | 52 | -0.02 | 0     | N/A |
| 321-327 | 7mer-m8 | -0.14 | 84 | -0.14 | 0     | N/A |
| 323-329 | 7mer-m8 | -0.02 | 44 | -0.02 | 0     | N/A |
| 330-336 | 7mer-1A | -0.07 | 65 | -0.07 | 0     | N/A |
| 336-342 | 7mer-1A | -0.08 | 62 | -0.08 | 0     | N/A |
| 338-344 | 7mer-1A | -0.05 | 52 | -0.05 | 0.017 | N/A |
| 338-344 | 7mer-1A | -0.01 | 21 | -0.01 | 2.346 | N/A |
| 341-347 | 7mer-m8 | -0.2  | 84 | -0.2  | 0     | N/A |
| 344-350 | 7mer-m8 | -0.12 | 84 | -0.12 | 0     | N/A |
| 362-368 | 7mer-1A | -0.08 | 80 | -0.08 | 0     | N/A |
| 362-368 | 7mer-1A | -0.06 | 73 | -0.06 | 0     | N/A |
| 362-368 | 7mer-1A | -0.01 | 38 | -0.01 | 0     | N/A |
| 368-374 | 7mer-m8 | -0.07 | 66 | -0.07 | 0.615 | N/A |
| 370-376 | 7mer-m8 | -0.05 | 44 | -0.05 | 2.143 | N/A |
| 370-376 | 7mer-m8 | -0.05 | 42 | -0.05 | 2.143 | N/A |
| 372-378 | 7mer-m8 | -0.22 | 90 | -0.22 | 0     | N/A |
| 372-378 | 7mer-1A | -0.16 | 84 | -0.16 | 0.155 | N/A |
| 372-378 | 7mer-1A | -0.16 | 83 | -0.16 | 0.155 | N/A |
| 374-380 | 7mer-m8 | -0.05 | 50 | -0.05 | 0.155 | N/A |
| 383-389 | 7mer-1A | -0.08 | 68 | -0.08 | 0     | N/A |
| 390-396 | 7mer-m8 | -0.05 | 73 | -0.05 | 0     | N/A |
| 393-399 | 7mer-1A | -0.06 | 65 | -0.06 | 0.017 | N/A |
| 395-401 | 7mer-1A | -0.13 | 70 | -0.13 | 0     | N/A |
| 395-401 | 7mer-1A | -0.01 | 21 | -0.01 | 0     | N/A |
| 396-402 | 7mer-m8 | -0.04 | 33 | -0.04 | 0     | N/A |
| 398-404 | 7mer-1A | -0.04 | 44 | -0.04 | 0.859 | N/A |
| 404-410 | 7mer-m8 | -0.15 | 87 | -0.15 | 0     | N/A |
| 406-412 | 7mer-m8 | -0.14 | 88 | -0.14 | 0     | N/A |
| 407-413 | 7mer-m8 | -0.11 | 79 | -0.11 | 0     | N/A |
| 408-414 | 7mer-m8 | -0.07 | 65 | -0.07 | 0     | N/A |
| 409-415 | 7mer-m8 | -0.17 | 91 | -0.17 | 0.597 | N/A |
| 409-415 | 7mer-m8 | -0.11 | 90 | -0.11 | 0.597 | N/A |
| 409-415 | 7mer-m8 | -0.16 | 89 | -0.16 | 0.597 | N/A |
| 412-418 | 7mer-m8 | -0.15 | 89 | -0.15 | 0.155 | N/A |
| 421-427 | 7mer-m8 | -0.12 | 90 | -0.12 | 0.084 | N/A |

|         |         |       |    |       |       |     |
|---------|---------|-------|----|-------|-------|-----|
| 423-429 | 7mer-m8 | -0.03 | 48 | -0.03 | 0.707 | N/A |
| 435-441 | 7mer-m8 | -0.02 | 60 | -0.02 | 0     | N/A |
| 441-447 | 7mer-1A | -0.05 | 55 | -0.05 | 1.778 | N/A |
| 441-447 | 7mer-1A | -0.05 | 55 | -0.05 | 1.778 | N/A |
| 442-448 | 7mer-m8 | -0.14 | 89 | -0.14 | 0.155 | N/A |
| 445-451 | 7mer-m8 | -0.15 | 86 | -0.15 | 0.155 | N/A |
| 447-454 | 8mer    | -0.28 | 92 | -0.28 | 0.155 | N/A |
| 447-454 | 8mer    | -0.22 | 92 | -0.22 | 0.155 | N/A |
| 447-454 | 8mer    | -0.26 | 91 | -0.26 | 0.155 | N/A |
| 447-454 | 8mer    | -0.26 | 91 | -0.26 | 0.155 | N/A |
| 448-454 | 7mer-1A | -0.13 | 85 | -0.13 | 0     | N/A |
| 448-454 | 7mer-1A | -0.15 | 73 | -0.15 | 0.145 | N/A |
| 449-455 | 7mer-m8 | -0.13 | 76 | -0.13 | 0     | N/A |
| 453-459 | 7mer-1A | -0.01 | 33 | -0.01 | 0.33  | N/A |
| 457-463 | 7mer-m8 | -0.1  | 84 | -0.1  | 0     | N/A |
| 458-465 | 8mer    | -0.37 | 97 | -0.37 | 0     | N/A |
| 460-466 | 7mer-1A | -0.08 | 75 | -0.08 | 0.145 | N/A |
| 471-477 | 7mer-m8 | -0.05 | 71 | -0.05 | 0     | N/A |
| 472-478 | 7mer-m8 | -0.02 | 41 | -0.02 | 0.686 | N/A |
| 476-482 | 7mer-m8 | -0.1  | 69 | -0.1  | 0     | N/A |
| 476-482 | 7mer-m8 | -0.1  | 69 | -0.1  | 0     | N/A |
| 476-482 | 7mer-1A | -0.12 | 67 | -0.12 | 0     | N/A |
| 477-484 | 8mer    | -0.39 | 97 | -0.39 | 0     | N/A |
| 478-484 | 7mer-1A | -0.27 | 93 | -0.27 | 0.109 | N/A |
| 478-484 | 7mer-m8 | -0.22 | 85 | -0.22 | 0     | N/A |
| 478-484 | 7mer-1A | -0.08 | 66 | -0.08 | 0     | N/A |
| 478-484 | 7mer-1A | -0.08 | 66 | -0.08 | 0     | N/A |
| 478-484 | 7mer-1A | -0.01 | 42 | -0.01 | 0.017 | N/A |
| 479-485 | 7mer-m8 | -0.24 | 92 | -0.24 | 0.109 | N/A |
| 485-491 | 7mer-m8 | -0.02 | 38 | -0.02 | 0     | N/A |
| 488-494 | 7mer-m8 | -0.14 | 82 | -0.14 | 1.395 | N/A |
| 492-498 | 7mer-m8 | -0.3  | 80 | -0.3  | 0     | N/A |
| 500-507 | 8mer    | -0.03 | 65 | -0.03 | 0     | N/A |
| 501-507 | 7mer-1A | -0.02 | 42 | -0.02 | 0     | N/A |
| 510-516 | 7mer-m8 | -0.14 | 90 | -0.14 | 0     | N/A |
| 513-519 | 7mer-m8 | -0.09 | 67 | -0.09 | 0.145 | N/A |
| 513-519 | 7mer-m8 | -0.08 | 65 | -0.08 | 0.145 | N/A |
| 513-519 | 7mer-m8 | -0.08 | 61 | -0.08 | 0.145 | N/A |
| 514-520 | 7mer-m8 | -0.15 | 75 | -0.15 | 0.155 | N/A |
| 514-520 | 7mer-m8 | -0.13 | 70 | -0.13 | 0.155 | N/A |
| 514-520 | 7mer-m8 | -0.13 | 69 | -0.13 | 0.155 | N/A |
| 514-520 | 7mer-m8 | -0.12 | 66 | -0.12 | 0.155 | N/A |
| 514-520 | 7mer-m8 | -0.11 | 64 | -0.11 | 0.155 | N/A |
| 514-520 | 7mer-m8 | -0.11 | 64 | -0.11 | 0.155 | N/A |

|         |         |       |    |       |       |     |
|---------|---------|-------|----|-------|-------|-----|
| 515-521 | 7mer-m8 | -0.07 | 59 | -0.07 | 0     | N/A |
| 517-523 | 7mer-m8 | -0.15 | 82 | -0.15 | 0     | N/A |
| 525-531 | 7mer-m8 | -0.09 | 77 | -0.09 | 0     | N/A |
| 526-532 | 7mer-m8 | -0.14 | 73 | -0.14 | 0     | N/A |
| 526-532 | 7mer-m8 | -0.06 | 66 | -0.06 | 0     | N/A |
| 528-534 | 7mer-m8 | -0.2  | 91 | -0.2  | 0.017 | N/A |
| 536-542 | 7mer-1A | -0.04 | 55 | -0.04 | 0     | N/A |
| 546-552 | 7mer-m8 | -0.24 | 85 | -0.24 | 0     | N/A |
| 548-554 | 7mer-1A | -0.01 | 27 | -0.01 | 0     | N/A |
| 554-560 | 7mer-m8 | -0.18 | 83 | -0.18 | 0     | N/A |
| 560-566 | 7mer-m8 | -0.06 | 56 | -0.06 | 0.155 | N/A |
| 563-569 | 7mer-1A | -0.14 | 66 | -0.14 | 0.145 | N/A |
| 564-570 | 7mer-1A | -0.08 | 65 | -0.08 | 2.438 | N/A |
| 569-575 | 7mer-m8 | -0.07 | 27 | -0.07 | 2.5   | N/A |
| 571-577 | 7mer-m8 | -0.14 | 61 | -0.14 | 0     | N/A |
| 574-580 | 7mer-m8 | -0.08 | 41 | -0.08 | 0     | N/A |
| 579-585 | 7mer-m8 | -0.04 | 16 | -0.04 | 0     | N/A |
| 584-590 | 7mer-m8 | -0.02 | 33 | -0.02 | 0     | N/A |
| 587-593 | 7mer-m8 | -0.02 | 40 | -0.02 | 0     | N/A |
| 587-593 | 7mer-m8 | -0.02 | 39 | -0.02 | 0     | N/A |
| 587-593 | 7mer-m8 | -0.02 | 31 | -0.02 | 0     | N/A |
| 587-593 | 7mer-m8 | -0.02 | 30 | -0.02 | 0     | N/A |
| 587-593 | 7mer-m8 | -0.02 | 30 | -0.02 | 0     | N/A |
| 588-594 | 7mer-m8 | -0.02 | 11 | -0.02 | 0     | N/A |
| 599-606 | 8mer    | -0.34 | 91 | -0.34 | 0     | N/A |
| 604-610 | 7mer-m8 | -0.02 | 41 | -0.02 | 0     | N/A |
| 605-611 | 7mer-m8 | -0.02 | 29 | -0.02 | 0     | N/A |
| 607-613 | 7mer-m8 | -0.02 | 50 | -0.02 | 0     | N/A |
| 613-619 | 7mer-m8 | -0.05 | 57 | -0.05 | 0     | N/A |
| 627-633 | 7mer-m8 | -0.09 | 74 | -0.09 | 0     | N/A |
| 629-635 | 7mer-1A | -0.11 | 74 | -0.11 | 0     | N/A |
| 638-644 | 7mer-m8 | -0.08 | 63 | -0.08 | 0     | N/A |
| 649-656 | 8mer    | -0.31 | 89 | -0.31 | 0     | N/A |
| 654-660 | 7mer-m8 | -0.02 | 15 | -0.02 | 0     | N/A |
| 661-667 | 7mer-1A | -0.21 | 73 | -0.21 | 0.017 | N/A |
| 662-668 | 7mer-m8 | -0.13 | 81 | -0.13 | 0     | N/A |
| 666-672 | 7mer-m8 | -0.04 | 61 | -0.04 | 0     | N/A |
| 667-673 | 7mer-m8 | -0.02 | 54 | -0.02 | 0.017 | N/A |
| 669-675 | 7mer-m8 | -0.02 | 49 | -0.02 | 0     | N/A |
| 673-679 | 7mer-1A | -0.06 | 46 | -0.06 | 0     | N/A |
| 673-679 | 7mer-1A | -0.04 | 40 | -0.04 | 0     | N/A |
| 674-680 | 7mer-m8 | -0.08 | 65 | -0.08 | 0     | N/A |
| 676-683 | 8mer    | -0.03 | 52 | -0.03 | 0     | N/A |
| 677-683 | 7mer-1A | -0.01 | 18 | -0.01 | 0     | N/A |

|         |         |       |    |       |       |     |
|---------|---------|-------|----|-------|-------|-----|
| 680-686 | 7mer-1A | -0.08 | 69 | -0.08 | 0     | N/A |
| 680-686 | 7mer-1A | -0.04 | 56 | -0.04 | 0     | N/A |
| 680-686 | 7mer-m8 | -0.02 | 39 | -0.02 | 0     | N/A |
| 686-693 | 8mer    | -0.14 | 85 | -0.14 | 0     | N/A |
| 686-693 | 8mer    | -0.08 | 83 | -0.08 | 0     | N/A |
| 687-693 | 7mer-1A | -0.06 | 51 | -0.06 | 0.609 | N/A |
| 687-693 | 7mer-m8 | -0.04 | 48 | -0.04 | 0     | N/A |
| 687-693 | 7mer-1A | -0.06 | 43 | -0.05 | 0.707 | N/A |
| 687-693 | 7mer-m8 | -0.02 | 40 | -0.02 | 0     | N/A |
| 687-693 | 7mer-1A | -0.01 | 33 | -0.01 | 0     | N/A |
| 687-693 | 7mer-1A | -0.03 | 31 | -0.03 | 0.707 | N/A |
| 687-693 | 7mer-1A | -0.01 | 29 | -0.01 | 0.707 | N/A |
| 687-693 | 7mer-1A | -0.01 | 27 | -0.01 | 0.707 | N/A |
| 688-695 | 8mer    | -0.04 | 62 | -0.04 | 0     | N/A |
| 689-695 | 7mer-1A | -0.05 | 78 | -0.05 | 0     | N/A |
| 689-695 | 7mer-1A | -0.11 | 75 | -0.1  | 0.017 | N/A |
| 689-695 | 7mer-1A | -0.09 | 73 | -0.09 | 0.017 | N/A |
| 689-695 | 7mer-1A | -0.08 | 69 | -0.08 | 0.017 | N/A |
| 689-695 | 7mer-1A | -0.04 | 68 | -0.04 | 0.017 | N/A |
| 689-695 | 7mer-1A | -0.05 | 54 | -0.05 | 0.017 | N/A |
| 698-704 | 7mer-1A | -0.01 | 34 | -0.01 | 0.017 | N/A |
| 699-705 | 7mer-m8 | -0.02 | 52 | -0.02 | 0     | N/A |
| 700-706 | 7mer-m8 | -0.06 | 73 | -0.06 | 0.145 | N/A |
| 711-717 | 7mer-m8 | -0.03 | 34 | -0.03 | 0.155 | N/A |
| 711-717 | 7mer-m8 | -0.02 | 32 | -0.02 | 0.155 | N/A |
| 711-717 | 7mer-m8 | -0.02 | 21 | -0.02 | 0.155 | N/A |
| 711-717 | 7mer-m8 | -0.02 | 21 | -0.02 | 0.155 | N/A |
| 714-720 | 7mer-m8 | -0.09 | 45 | -0.09 | 0     | N/A |
| 715-722 | 8mer    | -0.35 | 94 | -0.35 | 0     | N/A |
| 716-722 | 7mer-m8 | -0.15 | 64 | -0.14 | 0     | N/A |
| 716-722 | 7mer-1A | -0.09 | 61 | -0.09 | 0     | N/A |
| 732-738 | 7mer-m8 | -0.02 | 40 | -0.02 | 0     | N/A |
| 732-738 | 7mer-m8 | -0.02 | 39 | -0.02 | 0     | N/A |
| 732-738 | 7mer-m8 | -0.02 | 31 | -0.02 | 0     | N/A |
| 732-738 | 7mer-m8 | -0.02 | 30 | -0.02 | 0     | N/A |
| 732-738 | 7mer-m8 | -0.02 | 30 | -0.02 | 0     | N/A |
| 734-741 | 8mer    | -0.26 | 93 | -0.26 | 0     | N/A |
| 734-741 | 8mer    | -0.27 | 93 | -0.27 | 0     | N/A |
| 735-741 | 7mer-1A | -0.07 | 64 | -0.07 | 0     | N/A |
| 742-748 | 7mer-1A | -0.21 | 78 | -0.21 | 0.017 | N/A |
| 745-752 | 8mer    | -0.22 | 92 | -0.22 | 0.017 | N/A |
| 746-753 | 8mer    | -0.03 | 68 | -0.03 | 0     | N/A |
| 746-752 | 7mer-1A | -0.01 | 16 | -0.01 | 0     | N/A |
| 747-753 | 7mer-1A | -0.01 | 21 | -0.01 | 0     | N/A |

|         |         |       |    |       |       |       |
|---------|---------|-------|----|-------|-------|-------|
| 756-762 | 7mer-m8 | -0.08 | 68 | -0.08 | 0.155 | N/A   |
| 759-765 | 7mer-m8 | -0.05 | 39 | -0.05 | 0.24  | N/A   |
| 759-765 | 7mer-m8 | -0.05 | 37 | -0.05 | 0.24  | N/A   |
| 759-765 | 7mer-m8 | -0.04 | 32 | -0.04 | 0.24  | N/A   |
| 759-765 | 7mer-m8 | -0.04 | 31 | -0.04 | 0.24  | N/A   |
| 761-767 | 7mer-m8 | -0.07 | 61 | -0.07 | 0     | N/A   |
| 761-767 | 7mer-m8 | -0.03 | 60 | -0.03 | 0     | N/A   |
| 761-767 | 7mer-m8 | -0.05 | 54 | -0.05 | 0     | N/A   |
| 761-767 | 7mer-m8 | -0.04 | 48 | -0.04 | 0     | N/A   |
| 761-767 | 7mer-m8 | -0.02 | 39 | -0.02 | 0     | N/A   |
| 762-769 | 8mer    | -0.16 | 72 | -0.16 | 0     | N/A   |
| 763-769 | 7mer-m8 | -0.12 | 82 | -0.12 | 0     | N/A   |
| 763-769 | 7mer-1A | -0.1  | 64 | -0.1  | 0     | N/A   |
| 765-771 | 7mer-1A | -0.01 | 41 | -0.01 | 0     | N/A   |
| 765-771 | 7mer-1A | -0.01 | 41 | -0.01 | 0     | N/A   |
| 771-777 | 7mer-1A | -0.04 | 59 | -0.04 | 0.587 | N/A   |
| 771-777 | 7mer-1A | -0.02 | 39 | -0.02 | 0.587 | N/A   |
| 772-779 | 8mer    | -0.14 | 94 | -0.14 | 0     | N/A   |
| 780-786 | 7mer-m8 | -0.11 | 78 | -0.11 | 0.017 | N/A   |
| 783-789 | 7mer-1A | -0.06 | 59 | -0.05 | 3.482 | N/A   |
| 787-793 | 7mer-1A | -0.03 | 48 | -0.03 | 0     | N/A   |
| 792-799 | 8mer    | -0.15 | 78 | -0.15 | 0     | N/A   |
| 793-799 | 7mer-m8 | -0.02 | 48 | -0.02 | 0     | N/A   |
| 798-804 | 7mer-m8 | -0.04 | 18 | -0.04 | 0     | N/A   |
| 801-807 | 7mer-m8 | -0.06 | 50 | -0.06 | 0     | N/A   |
| 803-809 | 7mer-m8 | -0.06 | 63 | -0.06 | 0     | N/A   |
| 803-809 | 7mer-m8 | -0.04 | 61 | -0.04 | 0     | N/A   |
| 803-809 | 7mer-m8 | -0.03 | 52 | -0.03 | 0     | N/A   |
| 803-809 | 7mer-1A | -0.01 | 19 | -0.01 | 0     | N/A   |
| 804-810 | 7mer-m8 | -0.02 | 40 | -0.02 | 0.145 | N/A   |
| 806-813 | 8mer    | -0.05 | 40 | -0.05 | 0     | N/A   |
| 807-813 | 7mer-1A | -0.02 | 37 | -0.02 | 0     | N/A   |
| 808-814 | 7mer-m8 | -0.04 | 56 | -0.04 | 0.147 | < 0.1 |
| 808-814 | 7mer-m8 | -0.02 | 36 | -0.02 | 0.147 | < 0.1 |
| 812-819 | 8mer    | -0.22 | 87 | -0.22 | 0     | N/A   |
| 812-819 | 8mer    | -0.19 | 82 | -0.19 | 0     | N/A   |
| 815-821 | 7mer-1A | -0.2  | 87 | -0.2  | 0.017 | N/A   |
| 815-821 | 7mer-1A | -0.14 | 66 | -0.14 | 0     | N/A   |
| 816-822 | 7mer-m8 | -0.11 | 53 | -0.11 | 0     | N/A   |
| 820-826 | 7mer-1A | -0.06 | 62 | -0.06 | 0     | N/A   |
| 820-826 | 7mer-m8 | -0.02 | 45 | -0.02 | 0     | N/A   |
| 822-828 | 7mer-m8 | -0.09 | 79 | -0.09 | 0.017 | N/A   |
| 822-828 | 7mer-m8 | -0.05 | 79 | -0.05 | 0.017 | N/A   |
| 822-828 | 7mer-1A | -0.07 | 54 | -0.07 | 0.042 | N/A   |

|         |         |       |    |       |       |       |
|---------|---------|-------|----|-------|-------|-------|
| 826-832 | 7mer-m8 | -0.03 | 49 | -0.03 | 0     | N/A   |
| 827-834 | 8mer    | -0.19 | 80 | -0.19 | 0.214 | < 0.1 |
| 828-834 | 7mer-1A | -0.09 | 65 | -0.09 | 0.145 | N/A   |
| 828-834 | 7mer-1A | -0.01 | 30 | -0.01 | 0.017 | N/A   |
| 829-835 | 7mer-m8 | -0.03 | 53 | -0.03 | 0     | N/A   |
| 831-837 | 7mer-m8 | -0.05 | 49 | -0.05 | 0     | N/A   |
| 832-838 | 7mer-m8 | -0.15 | 83 | -0.15 | 0     | N/A   |
| 833-839 | 7mer-m8 | -0.06 | 56 | -0.05 | 0.017 | N/A   |
| 838-844 | 7mer-m8 | -0.02 | 30 | -0.02 | 0.125 | N/A   |
| 846-852 | 7mer-m8 | -0.13 | 60 | -0.13 | 0     | N/A   |
| 850-856 | 7mer-m8 | -0.02 | 35 | -0.02 | 0     | N/A   |
| 852-858 | 7mer-m8 | -0.02 | 1  | -0.02 | 0     | N/A   |
| 856-862 | 7mer-1A | -0.16 | 53 | -0.15 | 0     | N/A   |
| 859-866 | 8mer    | -0.12 | 73 | -0.12 | 0     | N/A   |
| 859-866 | 8mer    | -0.12 | 72 | -0.12 | 0     | N/A   |
| 860-866 | 7mer-1A | -0.01 | 20 | -0.01 | 0     | N/A   |
| 861-867 | 7mer-m8 | -0.02 | 38 | -0.02 | 0     | N/A   |
| 864-870 | 7mer-1A | -0.01 | 46 | -0.01 | 0     | N/A   |
| 864-870 | 7mer-1A | -0.01 | 21 | -0.01 | 0     | N/A   |
| 865-871 | 7mer-m8 | -0.02 | 59 | -0.02 | 0     | N/A   |
| 868-874 | 7mer-m8 | -0.02 | 32 | -0.02 | 0     | N/A   |
| 869-875 | 7mer-m8 | -0.02 | 36 | -0.02 | 0     | N/A   |
| 872-878 | 7mer-m8 | -0.19 | 64 | -0.19 | 0     | N/A   |
| 875-881 | 7mer-1A | -0.16 | 67 | -0.16 | 0     | N/A   |
| 875-881 | 7mer-1A | -0.09 | 40 | -0.09 | 0     | N/A   |
| 877-883 | 7mer-m8 | -0.02 | 45 | -0.02 | 0     | N/A   |
| 877-883 | 7mer-m8 | -0.02 | 42 | -0.02 | 0     | N/A   |
| 877-883 | 7mer-m8 | -0.02 | 37 | -0.02 | 0     | N/A   |
| 877-883 | 7mer-1A | -0.01 | 19 | -0.01 | 0     | N/A   |
| 880-887 | 8mer    | -0.03 | 24 | -0.03 | 0     | N/A   |
| 881-887 | 7mer-1A | -0.01 | 11 | -0.01 | 0.155 | N/A   |
| 881-887 | 7mer-1A | -0.01 | 4  | -0.01 | 0     | N/A   |
| 882-888 | 7mer-m8 | -0.02 | 36 | -0.02 | 0     | N/A   |
| 883-889 | 7mer-m8 | -0.02 | 48 | -0.02 | 0     | N/A   |
| 884-890 | 7mer-m8 | -0.03 | 41 | -0.03 | 0.145 | N/A   |
| 886-892 | 7mer-m8 | -0.02 | 30 | -0.02 | 0     | N/A   |
| 887-893 | 7mer-m8 | -0.15 | 66 | -0.15 | 0     | N/A   |
| 889-895 | 7mer-1A | -0.2  | 69 | -0.2  | 0     | N/A   |
| 891-897 | 7mer-m8 | -0.09 | 31 | -0.09 | 0     | N/A   |
| 891-897 | 7mer-m8 | -0.03 | 15 | -0.03 | 0     | N/A   |
| 893-899 | 7mer-m8 | -0.15 | 73 | -0.15 | 0     | N/A   |
| 898-904 | 7mer-m8 | -0.02 | 47 | -0.02 | 0     | N/A   |
| 904-910 | 7mer-1A | -0.02 | 33 | -0.02 | 0     | N/A   |
| 904-910 | 7mer-1A | -0.01 | 26 | -0.01 | 0     | N/A   |

|           |           |       |     |       |       |       |
|-----------|-----------|-------|-----|-------|-------|-------|
| 910-917   | 8mer      | -0.06 | 71  | -0.06 | 0     | N/A   |
| 911-917   | 7mer-1A   | -0.07 | 62  | -0.07 | 0.145 | N/A   |
| 913-919   | 7mer-m8   | -0.02 | 36  | -0.02 | 0     | N/A   |
| 917-923   | 7mer-m8   | -0.02 | 35  | -0.02 | 0     | N/A   |
|           | non-      |       |     |       |       |       |
| 919-930   | canonical | N/A   | N/A | N/A   | 0     | N/A   |
|           | non-      |       |     |       |       |       |
| 919-930   | canonical | N/A   | N/A | N/A   | 0     | N/A   |
| 925-931   | 7mer-m8   | -0.02 | 20  | -0.02 | 0     | N/A   |
| 933-939   | 7mer-m8   | -0.02 | 38  | -0.02 | 0     | N/A   |
| 935-941   | 7mer-m8   | -0.06 | 65  | -0.05 | 0     | N/A   |
| 935-941   | 7mer-m8   | -0.04 | 59  | -0.04 | 0     | N/A   |
| 942-948   | 7mer-m8   | -0.15 | 60  | -0.15 | 0     | N/A   |
| 942-948   | 7mer-m8   | -0.09 | 47  | -0.09 | 0     | N/A   |
| 947-953   | 7mer-1A   | -0.11 | 78  | -0.11 | 0     | N/A   |
| 951-957   | 7mer-m8   | -0.02 | 45  | -0.02 | 0     | N/A   |
| 955-961   | 7mer-m8   | -0.04 | 66  | -0.04 | 0     | N/A   |
| 961-967   | 7mer-m8   | -0.14 | 57  | -0.14 | 0     | N/A   |
| 961-967   | 7mer-m8   | -0.07 | 32  | -0.07 | 0     | N/A   |
| 971-978   | 8mer      | -0.03 | 53  | -0.03 | 0     | N/A   |
| 972-978   | 7mer-1A   | -0.03 | 35  | -0.03 | 0     | N/A   |
| 974-980   | 7mer-m8   | -0.03 | 41  | -0.03 | 0     | N/A   |
| 984-990   | 7mer-m8   | -0.06 | 53  | -0.06 | 0     | N/A   |
| 986-993   | 8mer      | -0.12 | 82  | -0.12 | 0     | N/A   |
| 986-993   | 8mer      | -0.12 | 82  | -0.12 | 0     | N/A   |
| 987-994   | 8mer      | -0.16 | 81  | -0.16 | 0     | N/A   |
| 987-993   | 7mer-1A   | -0.07 | 57  | -0.07 | 0     | N/A   |
| 987-993   | 7mer-1A   | -0.01 | 31  | -0.01 | 0     | N/A   |
| 988-994   | 7mer-1A   | -0.01 | 46  | -0.01 | 0     | N/A   |
| 990-996   | 7mer-m8   | -0.03 | 52  | -0.03 | 0.042 | < 0.1 |
| 993-999   | 7mer-m8   | -0.02 | 33  | -0.02 | 0.017 | < 0.1 |
| 993-999   | 7mer-m8   | -0.02 | 33  | -0.02 | 0.017 | < 0.1 |
| 995-1001  | 7mer-1A   | -0.05 | 61  | -0.05 | 0     | N/A   |
| 995-1001  | 7mer-1A   | -0.01 | 29  | -0.01 | 0     | N/A   |
| 997-1003  | 7mer-m8   | -0.02 | 51  | -0.02 | 0.145 | N/A   |
| 1003-1009 | 7mer-m8   | -0.02 | 28  | -0.02 | 0     | N/A   |
| 1005-1011 | 7mer-1A   | -0.01 | 24  | -0.01 | 0     | N/A   |
| 1005-1011 | 7mer-1A   | -0.01 | 22  | -0.01 | 0     | N/A   |
| 1011-1017 | 7mer-m8   | -0.02 | 47  | -0.02 | 0     | N/A   |
| 1012-1018 | 7mer-m8   | -0.09 | 57  | -0.09 | 0     | N/A   |
| 1013-1019 | 7mer-m8   | -0.13 | 85  | -0.13 | 0     | N/A   |
| 1027-1034 | 8mer      | -0.21 | 86  | -0.21 | 0     | N/A   |
| 1027-1034 | 8mer      | -0.17 | 79  | -0.17 | 0     | N/A   |
| 1027-1034 | 8mer      | -0.11 | 76  | -0.11 | 0     | N/A   |

|           |         |       |    |       |       |     |
|-----------|---------|-------|----|-------|-------|-----|
| 1028-1034 | 7mer-m8 | -0.07 | 60 | -0.07 | 0     | N/A |
| 1029-1036 | 8mer    | -0.21 | 85 | -0.21 | 0.042 | N/A |
| 1030-1036 | 7mer-1A | -0.13 | 77 | -0.13 | 0     | N/A |
| 1030-1036 | 7mer-m8 | -0.15 | 74 | -0.15 | 0     | N/A |
| 1030-1036 | 7mer-1A | -0.07 | 64 | -0.07 | 0     | N/A |
| 1030-1036 | 7mer-1A | -0.07 | 64 | -0.07 | 0     | N/A |
| 1030-1036 | 7mer-1A | -0.03 | 55 | -0.03 | 0.017 | N/A |
| 1031-1037 | 7mer-m8 | -0.05 | 61 | -0.05 | 0     | N/A |
| 1033-1039 | 7mer-m8 | -0.02 | 37 | -0.02 | 0     | N/A |
| 1036-1042 | 7mer-m8 | -0.02 | 29 | -0.02 | 0     | N/A |
| 1037-1043 | 7mer-m8 | -0.09 | 70 | -0.09 | 0     | N/A |
| 1041-1047 | 7mer-m8 | -0.2  | 68 | -0.2  | 0.017 | N/A |
| 1046-1052 | 7mer-m8 | -0.07 | 24 | -0.07 | 0     | N/A |
| 1048-1054 | 7mer-1A | -0.01 | 18 | -0.01 | 0.145 | N/A |
| 1050-1056 | 7mer-m8 | -0.02 | 22 | -0.02 | 0     | N/A |
| 1051-1057 | 7mer-m8 | -0.02 | 17 | -0.02 | 0.145 | N/A |
| 1051-1057 | 7mer-m8 | -0.02 | 13 | -0.02 | 0.145 | N/A |
| 1052-1059 | 8mer    | -0.16 | 59 | -0.16 | 0     | N/A |
| 1052-1059 | 8mer    | -0.15 | 56 | -0.15 | 0     | N/A |
| 1053-1059 | 7mer-1A | -0.07 | 55 | -0.07 | 0     | N/A |
| 1053-1059 | 7mer-m8 | -0.06 | 51 | -0.05 | 0     | N/A |
| 1053-1059 | 7mer-m8 | -0.06 | 49 | -0.05 | 0     | N/A |
| 1053-1059 | 7mer-m8 | -0.02 | 30 | -0.02 | 0     | N/A |
| 1053-1059 | 7mer-1A | -0.01 | 25 | -0.01 | 0     | N/A |
| 1053-1059 | 7mer-1A | -0.01 | 22 | -0.01 | 0     | N/A |
| 1054-1060 | 7mer-m8 | -0.04 | 51 | -0.04 | 0     | N/A |
| 1055-1061 | 7mer-m8 | -0.04 | 60 | -0.04 | 0     | N/A |
| 1056-1062 | 7mer-m8 | -0.02 | 30 | -0.02 | 0     | N/A |
| 1056-1062 | 7mer-m8 | -0.02 | 29 | -0.02 | 0     | N/A |
| 1058-1065 | 8mer    | -0.13 | 63 | -0.12 | 0.017 | N/A |
| 1058-1065 | 8mer    | -0.1  | 59 | -0.1  | 0.017 | N/A |
| 1059-1065 | 7mer-1A | -0.05 | 52 | -0.05 | 0     | N/A |
| 1059-1065 | 7mer-m8 | -0.02 | 24 | -0.02 | 0.32  | N/A |
| 1063-1069 | 7mer-m8 | -0.02 | 37 | -0.02 | 0     | N/A |
| 1064-1070 | 7mer-m8 | -0.02 | 48 | -0.02 | 0.099 | N/A |
| 1064-1070 | 7mer-m8 | -0.02 | 48 | -0.02 | 0.099 | N/A |
| 1064-1070 | 7mer-m8 | -0.02 | 48 | -0.02 | 0.099 | N/A |
| 1064-1070 | 7mer-m8 | -0.02 | 48 | -0.02 | 0.099 | N/A |
| 1064-1070 | 7mer-m8 | -0.02 | 48 | -0.02 | 0.099 | N/A |
| 1067-1073 | 7mer-m8 | -0.02 | 69 | -0.02 | 0     | N/A |
| 1070-1076 | 7mer-1A | -0.01 | 50 | -0.01 | 0     | N/A |
| 1070-1076 | 7mer-m8 | -0.02 | 20 | -0.02 | 0     | N/A |
| 1072-1079 | 8mer    | -0.13 | 79 | -0.13 | 0     | N/A |
| 1073-1079 | 7mer-1A | -0.07 | 64 | -0.07 | 0     | N/A |

|           |         |       |    |       |       |       |
|-----------|---------|-------|----|-------|-------|-------|
| 1073-1079 | 7mer-m8 | -0.06 | 61 | -0.06 | 0     | N/A   |
| 1074-1080 | 7mer-m8 | -0.02 | 36 | -0.02 | 0     | N/A   |
| 1087-1094 | 8mer    | -0.11 | 75 | -0.11 | 0.145 | N/A   |
| 1088-1094 | 7mer-m8 | -0.03 | 63 | -0.03 | 0     | N/A   |
| 1088-1094 | 7mer-1A | -0.07 | 56 | -0.07 | 0.145 | N/A   |
| 1089-1095 | 7mer-m8 | -0.03 | 39 | -0.03 | 0     | N/A   |
| 1095-1101 | 7mer-1A | -0.14 | 84 | -0.14 | 0.017 | N/A   |
| 1095-1101 | 7mer-1A | -0.11 | 78 | -0.11 | 0.017 | N/A   |
| 1095-1101 | 7mer-1A | -0.16 | 75 | -0.16 | 0     | N/A   |
| 1095-1101 | 7mer-m8 | -0.13 | 73 | -0.13 | 0     | N/A   |
| 1095-1101 | 7mer-m8 | -0.12 | 72 | -0.12 | 0     | N/A   |
| 1095-1101 | 7mer-1A | -0.11 | 50 | -0.11 | 0     | N/A   |
| 1096-1103 | 8mer    | -0.23 | 89 | -0.23 | 0.221 | N/A   |
| 1097-1103 | 7mer-m8 | -0.24 | 87 | -0.24 | 0     | N/A   |
| 1097-1103 | 7mer-1A | -0.16 | 82 | -0.16 | 0     | N/A   |
| 1097-1103 | 7mer-1A | -0.07 | 72 | -0.07 | 0.017 | N/A   |
| 1097-1103 | 7mer-1A | -0.08 | 66 | -0.07 | 0     | N/A   |
| 1097-1103 | 7mer-1A | -0.08 | 65 | -0.07 | 0     | N/A   |
| 1098-1105 | 8mer    | -0.24 | 92 | -0.24 | 0     | N/A   |
| 1099-1105 | 7mer-1A | -0.12 | 75 | -0.12 | 0     | N/A   |
| 1099-1105 | 7mer-1A | -0.11 | 73 | -0.11 | 0     | N/A   |
| 1102-1109 | 8mer    | -0.07 | 65 | -0.07 | 0     | < 0.1 |
| 1103-1109 | 7mer-1A | -0.02 | 31 | -0.02 | 0     | N/A   |
| 1106-1112 | 7mer-m8 | -0.09 | 77 | -0.09 | 0     | N/A   |
| 1110-1116 | 7mer-1A | -0.06 | 64 | -0.06 | 0     | N/A   |
| 1116-1122 | 7mer-m8 | -0.13 | 84 | -0.13 | 0     | N/A   |
| 1116-1122 | 7mer-1A | -0.06 | 41 | -0.06 | 0     | N/A   |
| 1117-1124 | 8mer    | -0.28 | 96 | -0.28 | 0.017 | N/A   |
| 1117-1124 | 8mer    | -0.28 | 95 | -0.28 | 0.017 | N/A   |
| 1117-1124 | 8mer    | -0.27 | 94 | -0.26 | 0.017 | N/A   |
| 1118-1124 | 7mer-1A | -0.18 | 91 | -0.18 | 0     | N/A   |
| 1118-1124 | 7mer-1A | -0.13 | 75 | -0.13 | 0.017 | N/A   |
| 1119-1125 | 7mer-m8 | -0.17 | 83 | -0.17 | 0     | N/A   |
| 1137-1143 | 7mer-m8 | -0.23 | 85 | -0.23 | 0     | N/A   |
| 1138-1144 | 7mer-m8 | -0.19 | 88 | -0.19 | 0     | N/A   |
| 1138-1144 | 7mer-m8 | -0.12 | 76 | -0.12 | 0     | N/A   |
| 1138-1144 | 7mer-m8 | -0.07 | 74 | -0.07 | 0     | N/A   |
| 1142-1148 | 7mer-m8 | -0.3  | 81 | -0.3  | 0     | N/A   |
| 1142-1148 | 7mer-m8 | -0.28 | 78 | -0.28 | 0     | N/A   |
| 1145-1151 | 7mer-m8 | -0.22 | 89 | -0.22 | 0.017 | N/A   |
| 1145-1151 | 7mer-m8 | -0.2  | 86 | -0.2  | 0.017 | N/A   |
| 1146-1152 | 7mer-m8 | -0.16 | 82 | -0.16 | 0     | N/A   |
| 1146-1152 | 7mer-m8 | -0.16 | 81 | -0.16 | 0     | N/A   |
| 1147-1153 | 7mer-m8 | -0.19 | 83 | -0.19 | 0     | N/A   |

|           |           |       |     |       |       |     |
|-----------|-----------|-------|-----|-------|-------|-----|
| 1148-1154 | 7mer-m8   | -0.08 | 76  | -0.08 | 0     | N/A |
| 1148-1154 | 7mer-m8   | -0.12 | 73  | -0.12 | 0     | N/A |
| 1148-1154 | 7mer-m8   | -0.09 | 68  | -0.09 | 0     | N/A |
| 1148-1154 | 7mer-m8   | -0.08 | 65  | -0.08 | 0     | N/A |
| 1148-1154 | 7mer-m8   | -0.04 | 60  | -0.04 | 0     | N/A |
| 1149-1155 | 7mer-m8   | -0.13 | 65  | -0.13 | 0     | N/A |
| 1151-1157 | 7mer-m8   | -0.15 | 84  | -0.15 | 0     | N/A |
| 1152-1158 | 7mer-m8   | -0.16 | 85  | -0.16 | 0.155 | N/A |
| 1152-1158 | 7mer-m8   | -0.12 | 77  | -0.12 | 0.155 | N/A |
|           | non-      |       |     |       |       |     |
| 1156-1167 | canonical | N/A   | N/A | N/A   | 0     | N/A |
|           | non-      |       |     |       |       |     |
| 1156-1167 | canonical | N/A   | N/A | N/A   | 0     | N/A |
| 1159-1165 | 7mer-m8   | -0.1  | 63  | -0.1  | 0     | N/A |
| 1161-1167 | 7mer-1A   | -0.05 | 57  | -0.05 | 0     | N/A |
| 1161-1167 | 7mer-1A   | -0.05 | 56  | -0.05 | 0     | N/A |
| 1162-1168 | 7mer-m8   | -0.04 | 47  | -0.04 | 0     | N/A |
| 1164-1170 | 7mer-m8   | -0.13 | 74  | -0.13 | 0     | N/A |
| 1164-1170 | 7mer-m8   | -0.08 | 60  | -0.08 | 0     | N/A |
| 1165-1171 | 7mer-m8   | -0.18 | 66  | -0.18 | 0     | N/A |
| 1165-1171 | 7mer-m8   | -0.19 | 64  | -0.19 | 0     | N/A |
| 1166-1173 | 8mer      | -0.28 | 80  | -0.28 | 0     | N/A |
| 1166-1173 | 8mer      | -0.22 | 78  | -0.22 | 0     | N/A |
| 1166-1173 | 8mer      | -0.27 | 77  | -0.27 | 0     | N/A |
| 1167-1173 | 7mer-m8   | -0.12 | 70  | -0.11 | 0     | N/A |
| 1167-1173 | 7mer-m8   | -0.11 | 70  | -0.11 | 0     | N/A |
| 1167-1173 | 7mer-1A   | -0.16 | 62  | -0.16 | 0     | N/A |
| 1168-1174 | 7mer-m8   | -0.09 | 70  | -0.09 | 0     | N/A |
| 1168-1174 | 7mer-m8   | -0.09 | 70  | -0.09 | 0     | N/A |
| 1169-1176 | 8mer      | -0.18 | 88  | -0.18 | 0     | N/A |
| 1170-1176 | 7mer-1A   | -0.12 | 78  | -0.12 | 0     | N/A |
| 1170-1176 | 7mer-1A   | -0.1  | 75  | -0.1  | 0     | N/A |
| 1170-1176 | 7mer-1A   | -0.1  | 75  | -0.09 | 0     | N/A |
| 1170-1176 | 7mer-1A   | -0.08 | 73  | -0.08 | 0     | N/A |
| 1174-1180 | 7mer-m8   | -0.07 | 60  | -0.07 | 0     | N/A |
| 1177-1183 | 7mer-m8   | -0.02 | 34  | -0.02 | 0     | N/A |
| 1178-1184 | 7mer-m8   | -0.02 | 50  | -0.02 | 0     | N/A |
| 1186-1192 | 7mer-m8   | -0.02 | 32  | -0.02 | 0.017 | N/A |
| 1188-1194 | 7mer-1A   | -0.01 | 26  | -0.01 | 0     | N/A |
| 1189-1196 | 8mer      | -0.13 | 84  | -0.12 | 0.017 | N/A |
| 1189-1196 | 8mer      | -0.05 | 79  | -0.05 | 0.017 | N/A |
| 1190-1196 | 7mer-1A   | -0.02 | 32  | -0.02 | 0     | N/A |
| 1194-1200 | 7mer-m8   | -0.02 | 38  | -0.02 | 0     | N/A |
| 1194-1200 | 7mer-1A   | -0.01 | 30  | -0.01 | 0.017 | N/A |

|           |         |       |    |       |       |       |
|-----------|---------|-------|----|-------|-------|-------|
| 1194-1200 | 7mer-1A | -0.01 | 27 | -0.01 | 0.017 | N/A   |
| 1201-1208 | 8mer    | -0.47 | 99 | -0.47 | 0     | N/A   |
| 1201-1208 | 8mer    | -0.46 | 99 | -0.45 | 0     | N/A   |
| 1202-1208 | 7mer-1A | -0.03 | 61 | -0.03 | 0     | N/A   |
| 1202-1208 | 7mer-1A | -0.01 | 37 | -0.01 | 0     | N/A   |
| 1212-1218 | 7mer-1A | -0.01 | 33 | -0.01 | 0     | N/A   |
| 1219-1225 | 7mer-m8 | -0.02 | 30 | -0.02 | 0     | N/A   |
| 1220-1226 | 7mer-m8 | -0.02 | 30 | -0.02 | 0.145 | N/A   |
| 1222-1228 | 7mer-1A | -0.09 | 80 | -0.09 | 0.199 | N/A   |
| 1223-1229 | 7mer-m8 | -0.11 | 81 | -0.11 | 0.199 | N/A   |
| 1225-1232 | 8mer    | -0.18 | 88 | -0.18 | 0     | N/A   |
| 1227-1233 | 7mer-1A | -0.02 | 35 | -0.02 | 0.229 | < 0.1 |
| 1227-1233 | 7mer-1A | -0.02 | 35 | -0.02 | 0.229 | < 0.1 |
| 1228-1234 | 7mer-m8 | -0.02 | 55 | -0.02 | 0.229 | < 0.1 |
| 1230-1236 | 7mer-m8 | -0.02 | 44 | -0.02 | 0     | N/A   |
| 1233-1239 | 7mer-m8 | -0.05 | 72 | -0.05 | 0     | N/A   |
| 1242-1248 | 7mer-m8 | -0.02 | 46 | -0.02 | 0     | N/A   |
| 1242-1248 | 7mer-m8 | -0.02 | 45 | -0.02 | 0     | N/A   |
| 1243-1250 | 8mer    | -0.03 | 10 | -0.03 | 0     | N/A   |
| 1247-1253 | 7mer-m8 | -0.02 | 31 | -0.02 | 0     | N/A   |
| 1249-1255 | 7mer-1A | -0.29 | 95 | -0.29 | 0     | N/A   |
| 1259-1265 | 7mer-1A | -0.11 | 72 | -0.11 | 0.017 | N/A   |
| 1259-1265 | 7mer-1A | -0.08 | 63 | -0.08 | 0.017 | N/A   |
| 1259-1265 | 7mer-1A | -0.07 | 58 | -0.07 | 0     | N/A   |
| 1259-1265 | 7mer-1A | -0.05 | 49 | -0.05 | 0     | N/A   |
| 1263-1269 | 7mer-m8 | -0.04 | 81 | -0.04 | 0     | N/A   |
| 1273-1279 | 7mer-m8 | -0.13 | 73 | -0.13 | 0     | N/A   |
| 1277-1283 | 7mer-m8 | -0.02 | 63 | -0.02 | 0     | N/A   |
| 1280-1286 | 7mer-m8 | -0.02 | 41 | -0.02 | 0.285 | < 0.1 |
| 1283-1290 | 8mer    | -0.19 | 87 | -0.19 | 0     | N/A   |
| 1283-1290 | 8mer    | -0.12 | 87 | -0.12 | 0     | N/A   |
| 1299-1305 | 7mer-m8 | -0.14 | 81 | -0.14 | 0.911 | < 0.1 |
| 1302-1308 | 7mer-m8 | -0.19 | 92 | -0.19 | 0     | N/A   |
| 1307-1313 | 7mer-m8 | -0.08 | 61 | -0.08 | 0     | N/A   |
| 1308-1314 | 7mer-m8 | -0.19 | 94 | -0.19 | 0.353 | N/A   |
| 1318-1325 | 8mer    | -0.19 | 93 | -0.19 | 0     | N/A   |
| 1320-1326 | 7mer-1A | -0.09 | 70 | -0.09 | 0     | N/A   |
| 1322-1328 | 7mer-1A | -0.1  | 83 | -0.1  | 0     | N/A   |
| 1322-1328 | 7mer-1A | -0.08 | 76 | -0.08 | 0.017 | N/A   |
| 1323-1330 | 8mer    | -0.03 | 71 | -0.03 | 0     | N/A   |
| 1333-1339 | 7mer-m8 | -0.02 | 67 | -0.02 | 0     | N/A   |
| 1333-1339 | 7mer-m8 | -0.02 | 67 | -0.02 | 0     | N/A   |
| 1333-1339 | 7mer-m8 | -0.02 | 67 | -0.02 | 0     | N/A   |
| 1333-1339 | 7mer-m8 | -0.02 | 67 | -0.02 | 0     | N/A   |

|           |           |       |     |       |       |       |
|-----------|-----------|-------|-----|-------|-------|-------|
| 1333-1339 | 7mer-m8   | -0.02 | 67  | -0.02 | 0     | N/A   |
| 1333-1339 | 7mer-m8   | -0.02 | 67  | -0.02 | 0     | N/A   |
| 1333-1339 | 7mer-m8   | -0.02 | 67  | -0.02 | 0     | N/A   |
| 1340-1346 | 7mer-m8   | -0.02 | 61  | -0.02 | 0.017 | N/A   |
| 1340-1346 | 7mer-m8   | -0.02 | 60  | -0.02 | 0.017 | N/A   |
| 1340-1346 | 7mer-m8   | -0.02 | 59  | -0.02 | 0.017 | N/A   |
| 1340-1346 | 7mer-m8   | -0.02 | 59  | -0.02 | 0.017 | N/A   |
| 1340-1346 | 7mer-m8   | -0.02 | 59  | -0.02 | 0.017 | N/A   |
| 1341-1348 | 8mer      | -0.03 | 69  | -0.01 | 0.155 | N/A   |
| 1341-1348 | 8mer      | -0.03 | 69  | -0.01 | 0.155 | N/A   |
| 1344-1350 | 7mer-1A   | -0.01 | 40  | 0     | 0     | N/A   |
| 1345-1351 | 7mer-1A   | -0.01 | 49  | 0     | 0     | N/A   |
| 1346-1352 | 7mer-1A   | -0.01 | 40  | 0     | 0.145 | N/A   |
| 1353-1359 | 7mer-1A   | -0.07 | 70  | -0.03 | 0     | N/A   |
| 1361-1367 | 7mer-1A   | -0.01 | 45  | 0     | 0     | N/A   |
| 1366-1372 | 7mer-1A   | -0.06 | 61  | -0.03 | 0     | N/A   |
| 1367-1373 | 7mer-m8   | -0.07 | 74  | -0.03 | 0.017 | N/A   |
| 1373-1379 | 7mer-1A   | -0.05 | 55  | -0.02 | 0     | N/A   |
| 1376-1382 | 7mer-m8   | -0.08 | 63  | -0.04 | 0.229 | < 0.1 |
| 1376-1382 | 7mer-m8   | -0.08 | 63  | -0.04 | 0.229 | < 0.1 |
| 1376-1382 | 7mer-m8   | -0.08 | 63  | -0.04 | 0.229 | < 0.1 |
| 1378-1384 | 7mer-1A   | -0.02 | 50  | -0.01 | 0     | N/A   |
| 1384-1390 | 7mer-1A   | -0.01 | 4   | 0     | 0     | N/A   |
| 1395-1402 | 8mer      | -0.06 | 27  | -0.03 | 0     | N/A   |
| 1397-1403 | 7mer-1A   | -0.01 | 25  | 0     | 0     | < 0.1 |
| 1397-1403 | 7mer-1A   | -0.01 | 23  | 0     | 0     | N/A   |
| 1400-1406 | 7mer-1A   | -0.01 | 19  | 0     | 0     | N/A   |
| 1404-1410 | 7mer-1A   | -0.01 | 39  | 0     | 0     | N/A   |
| 1404-1411 | 8mer      | -0.03 | 37  | -0.01 | 0     | N/A   |
| 1406-1412 | 7mer-m8   | -0.02 | 59  | -0.01 | 0     | N/A   |
| 1408-1414 | 7mer-m8   | -0.08 | 63  | -0.03 | 0     | N/A   |
| 1411-1417 | 7mer-m8   | -0.02 | 37  | -0.01 | 0     | N/A   |
| 1413-1419 | 7mer-m8   | -0.02 | 45  | -0.01 | 0.017 | N/A   |
|           | non-      |       |     |       |       |       |
| 1413-1424 | canonical | N/A   | N/A | N/A   | 0     | N/A   |
|           | non-      |       |     |       |       |       |
| 1413-1424 | canonical | N/A   | N/A | N/A   | 0     | N/A   |
| 1418-1424 | 7mer-1A   | -0.01 | 24  | 0     | 0     | N/A   |
| 1437-1443 | 7mer-m8   | -0.14 | 59  | -0.06 | 0     | N/A   |
| 1443-1449 | 7mer-m8   | -0.07 | 64  | -0.03 | 0     | N/A   |
| 1443-1449 | 7mer-m8   | -0.06 | 60  | -0.03 | 0     | N/A   |
| 1443-1449 | 7mer-1A   | -0.01 | 15  | 0     | 0.042 | N/A   |
| 1449-1455 | 7mer-m8   | -0.02 | 38  | -0.01 | 0     | N/A   |
| 1450-1456 | 7mer-m8   | -0.02 | 21  | -0.01 | 0     | N/A   |

|           |         |       |    |       |       |     |
|-----------|---------|-------|----|-------|-------|-----|
| 1452-1458 | 7mer-m8 | -0.08 | 61 | -0.03 | 0     | N/A |
| 1470-1476 | 7mer-m8 | -0.1  | 70 | -0.04 | 0     | N/A |
| 1475-1481 | 7mer-m8 | -0.02 | 18 | -0.01 | 0     | N/A |
| 1475-1481 | 7mer-m8 | -0.02 | 18 | -0.01 | 0     | N/A |
| 1480-1486 | 7mer-1A | -0.03 | 48 | -0.01 | 0     | N/A |
| 1499-1505 | 7mer-m8 | -0.12 | 55 | -0.05 | 0     | N/A |
| 1505-1511 | 7mer-m8 | -0.04 | 51 | -0.02 | 0     | N/A |
| 1505-1511 | 7mer-m8 | -0.02 | 36 | -0.01 | 0     | N/A |
| 1505-1511 | 7mer-1A | -0.01 | 15 | 0     | 0.017 | N/A |
| 1511-1517 | 7mer-m8 | -0.02 | 38 | -0.01 | 0     | N/A |
| 1512-1518 | 7mer-m8 | -0.02 | 21 | -0.01 | 0.145 | N/A |
| 1514-1520 | 7mer-m8 | -0.02 | 34 | -0.01 | 0     | N/A |
| 1525-1531 | 7mer-1A | -0.23 | 96 | -0.1  | 0     | N/A |
| 1525-1531 | 7mer-1A | -0.21 | 95 | -0.09 | 0     | N/A |
| 1525-1531 | 7mer-1A | -0.01 | 39 | 0     | 0     | N/A |
| 1525-1531 | 7mer-1A | -0.01 | 37 | 0     | 0     | N/A |
| 1535-1541 | 7mer-m8 | -0.02 | 26 | -0.01 | 0     | N/A |
| 1537-1543 | 7mer-m8 | -0.05 | 50 | -0.02 | 0     | N/A |
| 1548-1555 | 8mer    | -0.03 | 47 | -0.01 | 0     | N/A |
| 1549-1555 | 7mer-1A | -0.07 | 58 | -0.03 | 0     | N/A |
| 1549-1555 | 7mer-1A | -0.05 | 50 | -0.02 | 0     | N/A |
| 1550-1556 | 7mer-m8 | -0.02 | 58 | -0.01 | 0     | N/A |
| 1551-1557 | 7mer-m8 | -0.02 | 28 | -0.01 | 0.145 | N/A |
| 1552-1558 | 7mer-m8 | -0.03 | 44 | -0.01 | 0     | N/A |
| 1553-1560 | 8mer    | -0.24 | 85 | -0.1  | 0     | N/A |
| 1554-1561 | 8mer    | -0.15 | 78 | -0.06 | 0     | N/A |
| 1554-1560 | 7mer-1A | -0.11 | 77 | -0.05 | 0     | N/A |
| 1557-1564 | 8mer    | -0.04 | 58 | -0.02 | 0     | N/A |
| 1558-1564 | 7mer-1A | -0.01 | 25 | 0     | 0     | N/A |
| 1561-1567 | 7mer-m8 | -0.13 | 80 | -0.05 | 0     | N/A |
| 1563-1569 | 7mer-m8 | -0.08 | 64 | -0.04 | 0     | N/A |
| 1566-1572 | 7mer-m8 | -0.17 | 75 | -0.07 | 0     | N/A |
| 1574-1580 | 7mer-1A | -0.02 | 8  | -0.01 | 0     | N/A |
| 1577-1583 | 7mer-m8 | -0.05 | 72 | -0.02 | 0     | N/A |
| 1580-1586 | 7mer-m8 | -0.04 | 54 | -0.02 | 0     | N/A |
| 1580-1586 | 7mer-1A | -0.04 | 44 | -0.02 | 0     | N/A |
| 1581-1587 | 7mer-m8 | -0.05 | 76 | -0.02 | 0.229 | N/A |
| 1585-1591 | 7mer-m8 | -0.02 | 35 | -0.01 | 0     | N/A |
| 1586-1593 | 8mer    | -0.03 | 15 | -0.01 | 0     | N/A |
| 1586-1593 | 8mer    | -0.03 | 14 | -0.01 | 0     | N/A |
| 1587-1593 | 7mer-1A | -0.13 | 61 | -0.06 | 0     | N/A |
| 1587-1593 | 7mer-1A | -0.06 | 39 | -0.02 | 0     | N/A |
| 1587-1593 | 7mer-1A | -0.06 | 39 | -0.03 | 0     | N/A |
| 1588-1594 | 7mer-m8 | -0.02 | 39 | -0.01 | 0     | N/A |

|           |         |       |    |       |       |       |
|-----------|---------|-------|----|-------|-------|-------|
| 1588-1594 | 7mer-m8 | -0.02 | 39 | -0.01 | 0     | N/A   |
| 1589-1595 | 7mer-m8 | -0.02 | 39 | -0.01 | 0.145 | N/A   |
| 1590-1596 | 7mer-m8 | -0.02 | 24 | -0.01 | 0     | N/A   |
| 1590-1596 | 7mer-m8 | -0.02 | 19 | -0.01 | 0     | N/A   |
| 1594-1600 | 7mer-1A | -0.13 | 77 | -0.05 | 0     | N/A   |
| 1594-1600 | 7mer-1A | -0.1  | 72 | -0.04 | 0     | N/A   |
| 1594-1600 | 7mer-1A | -0.04 | 45 | -0.02 | 0     | N/A   |
| 1599-1605 | 7mer-1A | -0.01 | 15 | 0     | 0     | N/A   |
| 1601-1607 | 7mer-1A | -0.01 | 28 | 0     | 0.017 | N/A   |
| 1607-1613 | 7mer-1A | -0.04 | 61 | -0.02 | 0.229 | N/A   |
| 1607-1613 | 7mer-1A | -0.01 | 34 | -0.01 | 0.229 | N/A   |
| 1607-1613 | 7mer-1A | -0.02 | 33 | -0.01 | 0.229 | N/A   |
| 1608-1614 | 7mer-1A | -0.05 | 51 | -0.02 | 0     | N/A   |
| 1613-1619 | 7mer-m8 | -0.02 | 29 | -0.01 | 0.145 | N/A   |
| 1613-1619 | 7mer-m8 | -0.02 | 27 | -0.01 | 0.145 | N/A   |
| 1614-1620 | 7mer-m8 | -0.03 | 44 | -0.01 | 0.577 | N/A   |
| 1614-1620 | 7mer-m8 | -0.02 | 36 | -0.01 | 0.577 | N/A   |
| 1614-1620 | 7mer-m8 | -0.02 | 36 | -0.01 | 0.577 | N/A   |
| 1614-1620 | 7mer-m8 | -0.02 | 36 | -0.01 | 0.577 | N/A   |
| 1614-1620 | 7mer-m8 | -0.02 | 35 | -0.01 | 0.577 | N/A   |
| 1614-1620 | 7mer-m8 | -0.02 | 35 | -0.01 | 0.577 | N/A   |
| 1614-1620 | 7mer-m8 | -0.02 | 27 | -0.01 | 0.577 | N/A   |
| 1614-1620 | 7mer-m8 | -0.02 | 27 | -0.01 | 0.577 | N/A   |
| 1615-1621 | 7mer-m8 | -0.07 | 77 | -0.03 | 0     | N/A   |
| 1616-1622 | 7mer-m8 | -0.06 | 62 | -0.02 | 0.017 | N/A   |
| 1616-1622 | 7mer-m8 | -0.05 | 49 | -0.02 | 0.017 | N/A   |
| 1618-1624 | 7mer-m8 | -0.02 | 30 | -0.01 | 0     | N/A   |
| 1619-1626 | 8mer    | -0.31 | 90 | -0.13 | 0     | N/A   |
| 1620-1627 | 8mer    | -0.4  | 91 | -0.16 | 0     | N/A   |
| 1621-1627 | 7mer-1A | -0.2  | 75 | -0.08 | 0     | N/A   |
| 1621-1627 | 7mer-1A | -0.18 | 65 | -0.08 | 0     | N/A   |
| 1625-1632 | 8mer    | -0.03 | 43 | -0.01 | 0     | N/A   |
| 1626-1632 | 7mer-1A | -0.01 | 9  | 0     | 0.017 | N/A   |
| 1627-1633 | 7mer-m8 | -0.02 | 35 | -0.01 | 0     | N/A   |
| 1629-1635 | 7mer-1A | -0.06 | 51 | -0.03 | 0     | N/A   |
| 1631-1637 | 7mer-m8 | -0.02 | 41 | -0.01 | 0.202 | N/A   |
| 1631-1637 | 7mer-m8 | -0.02 | 31 | -0.01 | 0.202 | N/A   |
| 1633-1639 | 7mer-1A | -0.01 | 27 | 0     | 0     | N/A   |
| 1636-1642 | 7mer-m8 | -0.06 | 51 | -0.02 | 0.099 | N/A   |
| 1639-1645 | 7mer-m8 | -0.02 | 48 | -0.01 | 0.084 | < 0.1 |
| 1642-1648 | 7mer-m8 | -0.02 | 27 | -0.01 | 0.017 | N/A   |
| 1645-1652 | 8mer    | -0.11 | 62 | -0.05 | 0.187 | N/A   |
| 1646-1652 | 7mer-m8 | -0.02 | 36 | -0.01 | 0     | N/A   |

|           |         |       |    |       |       |     |
|-----------|---------|-------|----|-------|-------|-----|
| 1646-1652 | 7mer-m8 | -0.02 | 33 | -0.01 | 0     | N/A |
| 1650-1656 | 7mer-m8 | -0.02 | 37 | -0.01 | 0     | N/A |
| 1657-1663 | 7mer-m8 | -0.23 | 71 | -0.1  | 0     | N/A |
| 1664-1671 | 8mer    | -0.06 | 64 | -0.03 | 0     | N/A |
| 1669-1675 | 7mer-1A | -0.01 | 37 | 0     | 0     | N/A |
| 1673-1679 | 7mer-m8 | -0.18 | 76 | -0.08 | 0     | N/A |
| 1678-1684 | 7mer-m8 | -0.02 | 34 | -0.01 | 0     | N/A |
| 1680-1686 | 7mer-m8 | -0.02 | 33 | -0.01 | 0     | N/A |
| 1681-1687 | 7mer-m8 | -0.02 | 21 | -0.01 | 0     | N/A |
| 1684-1690 | 7mer-m8 | -0.02 | 44 | -0.01 | 0     | N/A |
| 1685-1691 | 7mer-m8 | -0.02 | 35 | -0.01 | 0     | N/A |
| 1688-1694 | 7mer-m8 | -0.02 | 49 | -0.01 | 0     | N/A |
| 1690-1696 | 7mer-m8 | -0.02 | 24 | -0.01 | 0     | N/A |
| 1690-1696 | 7mer-m8 | -0.02 | 20 | -0.01 | 0     | N/A |
| 1691-1698 | 8mer    | -0.11 | 69 | -0.05 | 0     | N/A |
| 1695-1701 | 7mer-1A | -0.07 | 65 | -0.03 | 0     | N/A |
| 1704-1710 | 7mer-m8 | -0.1  | 60 | -0.04 | 0.099 | N/A |
| 1706-1712 | 7mer-1A | -0.09 | 58 | -0.04 | 0     | N/A |
| 1706-1712 | 7mer-1A | -0.03 | 46 | -0.01 | 0     | N/A |
| 1706-1712 | 7mer-m8 | -0.02 | 43 | -0.01 | 0     | N/A |
| 1706-1712 | 7mer-1A | -0.04 | 21 | -0.02 | 0     | N/A |
| 1706-1712 | 7mer-1A | -0.03 | 16 | -0.01 | 0     | N/A |
| 1708-1714 | 7mer-m8 | -0.02 | 36 | -0.01 | 0     | N/A |
| 1710-1716 | 7mer-m8 | -0.02 | 43 | -0.01 | 0.017 | N/A |
| 1718-1724 | 7mer-m8 | -0.02 | 49 | -0.01 | 0     | N/A |
| 1720-1726 | 7mer-m8 | -0.02 | 24 | -0.01 | 0     | N/A |
| 1720-1726 | 7mer-m8 | -0.02 | 20 | -0.01 | 0     | N/A |
| 1721-1727 | 7mer-m8 | -0.05 | 55 | -0.02 | 0     | N/A |
| 1722-1728 | 7mer-m8 | -0.13 | 74 | -0.05 | 0     | N/A |
| 1722-1728 | 7mer-m8 | -0.1  | 72 | -0.04 | 0     | N/A |
| 1725-1731 | 7mer-m8 | -0.15 | 79 | -0.07 | 0     | N/A |
| 1728-1734 | 7mer-m8 | -0.02 | 50 | -0.01 | 0     | N/A |
| 1736-1742 | 7mer-m8 | -0.18 | 85 | -0.08 | 0.017 | N/A |
| 1745-1751 | 7mer-m8 | -0.02 | 28 | -0.01 | 0     | N/A |
| 1745-1751 | 7mer-m8 | -0.02 | 20 | -0.01 | 0     | N/A |
| 1746-1752 | 7mer-m8 | -0.02 | 45 | -0.01 | 0     | N/A |
| 1751-1757 | 7mer-m8 | -0.07 | 41 | -0.03 | 0     | N/A |
| 1754-1760 | 7mer-1A | -0.14 | 63 | -0.06 | 0     | N/A |
| 1757-1763 | 7mer-m8 | -0.02 | 47 | -0.01 | 0     | N/A |
| 1763-1769 | 7mer-1A | -0.16 | 85 | -0.07 | 0     | N/A |
| 1770-1776 | 7mer-m8 | -0.02 | 34 | -0.01 | 0     | N/A |
| 1780-1786 | 7mer-m8 | -0.02 | 21 | -0.01 | 0     | N/A |
| 1783-1789 | 7mer-m8 | -0.02 | 46 | -0.01 | 0     | N/A |
| 1785-1791 | 7mer-m8 | -0.02 | 27 | -0.01 | 0.155 | N/A |

|           |         |       |    |       |       |     |
|-----------|---------|-------|----|-------|-------|-----|
| 1786-1792 | 7mer-m8 | -0.02 | 30 | -0.01 | 0     | N/A |
| 1787-1793 | 7mer-m8 | -0.07 | 39 | -0.03 | 0     | N/A |
| 1790-1796 | 7mer-m8 | -0.09 | 62 | -0.04 | 0     | N/A |
| 1790-1796 | 7mer-m8 | -0.04 | 46 | -0.02 | 0     | N/A |
| 1791-1797 | 7mer-m8 | -0.09 | 68 | -0.04 | 0     | N/A |
| 1791-1797 | 7mer-m8 | -0.05 | 53 | -0.02 | 0     | N/A |
| 1792-1798 | 7mer-m8 | -0.02 | 43 | -0.01 | 0.155 | N/A |
| 1792-1798 | 7mer-m8 | -0.02 | 43 | -0.01 | 0.155 | N/A |
| 1792-1798 | 7mer-m8 | -0.02 | 43 | -0.01 | 0.155 | N/A |
| 1793-1799 | 7mer-m8 | -0.02 | 21 | -0.01 | 0.017 | N/A |
| 1794-1800 | 7mer-m8 | -0.02 | 13 | -0.01 | 0.155 | N/A |
| 1794-1800 | 7mer-m8 | -0.02 | 11 | -0.01 | 0.155 | N/A |
| 1796-1802 | 7mer-1A | -0.09 | 62 | -0.04 | 0     | N/A |
| 1796-1802 | 7mer-1A | -0.07 | 61 | -0.03 | 0     | N/A |
| 1796-1802 | 7mer-1A | -0.04 | 52 | -0.02 | 0     | N/A |
| 1796-1802 | 7mer-1A | -0.05 | 50 | -0.02 | 0     | N/A |
| 1796-1802 | 7mer-1A | -0.04 | 48 | -0.02 | 0     | N/A |
| 1796-1802 | 7mer-1A | -0.01 | 35 | 0     | 0     | N/A |
| 1796-1802 | 7mer-m8 | -0.02 | 30 | -0.01 | 0.145 | N/A |
| 1796-1802 | 7mer-m8 | -0.02 | 29 | -0.01 | 0.145 | N/A |
| 1796-1802 | 7mer-m8 | -0.02 | 29 | -0.01 | 0.145 | N/A |
| 1796-1802 | 7mer-m8 | -0.02 | 29 | -0.01 | 0.145 | N/A |
| 1796-1802 | 7mer-m8 | -0.02 | 29 | -0.01 | 0.145 | N/A |
| 1796-1802 | 7mer-m8 | -0.02 | 28 | -0.01 | 0.145 | N/A |
| 1796-1802 | 7mer-m8 | -0.02 | 27 | -0.01 | 0.145 | N/A |
| 1797-1803 | 7mer-m8 | -0.11 | 56 | -0.05 | 0     | N/A |
| 1797-1803 | 7mer-m8 | -0.1  | 53 | -0.04 | 0     | N/A |
| 1801-1808 | 8mer    | -0.03 | 35 | -0.01 | 0     | N/A |
| 1802-1808 | 7mer-1A | -0.01 | 29 | 0     | 0.017 | N/A |
| 1803-1809 | 7mer-m8 | -0.03 | 59 | -0.01 | 0.017 | N/A |
| 1811-1817 | 7mer-m8 | -0.02 | 30 | -0.01 | 0     | N/A |
| 1814-1820 | 7mer-m8 | -0.2  | 77 | -0.09 | 0.187 | N/A |
| 1825-1831 | 7mer-m8 | -0.02 | 19 | -0.01 | 0.145 | N/A |
| 1827-1833 | 7mer-m8 | -0.02 | 39 | -0.01 | 0     | N/A |
| 1829-1835 | 7mer-m8 | -0.03 | 37 | -0.01 | 0     | N/A |
| 1830-1836 | 7mer-m8 | -0.11 | 72 | -0.05 | 0     | N/A |
| 1831-1837 | 7mer-m8 | -0.03 | 51 | -0.01 | 0     | N/A |
| 1833-1839 | 7mer-1A | -0.01 | 16 | 0     | 0.155 | N/A |
| 1838-1844 | 7mer-m8 | -0.02 | 22 | -0.01 | 0     | N/A |
| 1839-1845 | 7mer-m8 | -0.02 | 42 | -0.01 | 0.017 | N/A |
| 1840-1846 | 7mer-m8 | -0.07 | 52 | -0.03 | 0     | N/A |
| 1842-1848 | 7mer-m8 | -0.02 | 31 | -0.01 | 0     | N/A |
| 1847-1853 | 7mer-1A | -0.04 | 35 | -0.02 | 0     | N/A |
| 1847-1853 | 7mer-1A | -0.03 | 22 | -0.01 | 0     | N/A |

|           |         |       |    |       |       |       |
|-----------|---------|-------|----|-------|-------|-------|
| 1852-1858 | 7mer-m8 | -0.06 | 47 | -0.03 | 0     | N/A   |
| 1855-1861 | 7mer-m8 | -0.02 | 48 | -0.01 | 0.032 | N/A   |
| 1855-1861 | 7mer-m8 | -0.02 | 48 | -0.01 | 0.032 | N/A   |
| 1855-1861 | 7mer-m8 | -0.02 | 48 | -0.01 | 0.032 | N/A   |
| 1855-1861 | 7mer-m8 | -0.02 | 48 | -0.01 | 0.032 | N/A   |
| 1855-1861 | 7mer-m8 | -0.02 | 48 | -0.01 | 0.032 | N/A   |
| 1865-1871 | 7mer-m8 | -0.06 | 62 | -0.02 | 0.911 | < 0.1 |
| 1867-1873 | 7mer-m8 | -0.02 | 39 | -0.01 | 0.017 | N/A   |
| 1872-1878 | 7mer-1A | -0.06 | 46 | -0.03 | 0     | N/A   |
| 1873-1879 | 7mer-m8 | -0.02 | 49 | -0.01 | 0.155 | N/A   |
| 1873-1879 | 7mer-m8 | -0.02 | 45 | -0.01 | 0.155 | N/A   |
| 1875-1881 | 7mer-m8 | -0.02 | 37 | -0.01 | 0     | N/A   |
| 1876-1882 | 7mer-m8 | -0.05 | 54 | -0.02 | 0     | N/A   |
| 1876-1882 | 7mer-m8 | -0.02 | 47 | -0.01 | 0     | N/A   |
| 1877-1884 | 8mer    | -0.09 | 61 | -0.04 | 0     | N/A   |
| 1878-1884 | 7mer-1A | -0.05 | 55 | -0.02 | 0     | N/A   |
| 1890-1896 | 7mer-m8 | -0.08 | 72 | -0.04 | 0.017 | N/A   |
| 1893-1899 | 7mer-1A | -0.01 | 48 | 0     | 0     | N/A   |
| 1895-1902 | 8mer    | -0.03 | 65 | -0.01 | 0     | N/A   |
| 1895-1902 | 8mer    | -0.03 | 63 | -0.01 | 0     | N/A   |
| 1895-1902 | 8mer    | -0.03 | 62 | -0.01 | 0     | N/A   |
| 1896-1902 | 7mer-1A | -0.01 | 51 | 0     | 0     | N/A   |
| 1896-1902 | 7mer-1A | -0.01 | 26 | 0     | 0.145 | N/A   |
| 1896-1902 | 7mer-1A | -0.01 | 25 | 0     | 0.145 | N/A   |
| 1896-1902 | 7mer-1A | -0.01 | 25 | 0     | 0.145 | N/A   |
| 1896-1902 | 7mer-1A | -0.01 | 25 | 0     | 0.145 | N/A   |
| 1901-1908 | 8mer    | -0.03 | 49 | -0.01 | 0.017 | N/A   |
| 1902-1908 | 7mer-1A | -0.01 | 30 | 0     | 0.32  | N/A   |
| 1902-1908 | 7mer-1A | -0.01 | 29 | 0     | 0.32  | N/A   |
| 1903-1909 | 7mer-m8 | -0.02 | 36 | -0.01 | 0.155 | N/A   |
| 1903-1909 | 7mer-m8 | -0.02 | 31 | -0.01 | 0.155 | N/A   |
| 1905-1911 | 7mer-1A | -0.08 | 79 | -0.03 | 0     | N/A   |
| 1905-1911 | 7mer-1A | -0.06 | 73 | -0.03 | 0     | N/A   |
| 1912-1918 | 7mer-m8 | -0.03 | 32 | -0.01 | 0     | N/A   |
| 1915-1921 | 7mer-m8 | -0.03 | 33 | -0.01 | 0.155 | N/A   |
| 1917-1924 | 8mer    | -0.12 | 86 | -0.05 | 0     | N/A   |
| 1918-1924 | 7mer-1A | -0.01 | 39 | 0     | 0.017 | N/A   |
| 1918-1924 | 7mer-1A | -0.01 | 29 | 0     | 0.145 | N/A   |
| 1926-1932 | 7mer-1A | -0.21 | 56 | -0.09 | 0     | N/A   |
| 1926-1932 | 7mer-1A | -0.21 | 56 | -0.09 | 0     | N/A   |
| 1926-1932 | 7mer-1A | -0.21 | 54 | -0.09 | 0     | N/A   |
| 1926-1932 | 7mer-1A | -0.2  | 54 | -0.09 | 0     | N/A   |
| 1927-1933 | 7mer-m8 | -0.12 | 75 | -0.05 | 0     | N/A   |
| 1927-1933 | 7mer-1A | -0.02 | 40 | -0.01 | 0     | N/A   |

|           |         |       |    |       |       |       |
|-----------|---------|-------|----|-------|-------|-------|
| 1929-1935 | 7mer-m8 | -0.04 | 50 | -0.02 | 0     | N/A   |
| 1930-1937 | 8mer    | -0.04 | 37 | -0.02 | 0.017 | N/A   |
| 1931-1937 | 7mer-1A | -0.05 | 36 | -0.02 | 0.017 | N/A   |
| 1932-1938 | 7mer-m8 | -0.02 | 44 | -0.01 | 0     | N/A   |
| 1937-1943 | 7mer-1A | -0.04 | 52 | -0.02 | 0     | N/A   |
| 1939-1945 | 7mer-m8 | -0.02 | 78 | -0.01 | 0     | N/A   |
| 1944-1951 | 8mer    | -0.04 | 52 | -0.02 | 0     | N/A   |
| 1944-1951 | 8mer    | -0.03 | 41 | -0.01 | 0     | N/A   |
| 1945-1951 | 7mer-1A | -0.04 | 41 | -0.02 | 0.202 | N/A   |
| 1945-1951 | 7mer-1A | -0.04 | 41 | -0.02 | 0.202 | N/A   |
| 1946-1952 | 7mer-m8 | -0.13 | 87 | -0.06 | 0     | N/A   |
| 1947-1953 | 7mer-m8 | -0.02 | 34 | -0.01 | 0     | N/A   |
| 1949-1955 | 7mer-m8 | -0.02 | 38 | -0.01 | 0.187 | < 0.1 |
| 1949-1955 | 7mer-m8 | -0.02 | 38 | -0.01 | 0.187 | < 0.1 |
| 1949-1955 | 7mer-m8 | -0.02 | 37 | -0.01 | 0.187 | < 0.1 |
| 1954-1960 | 7mer-m8 | -0.24 | 77 | -0.1  | 0     | N/A   |
| 1960-1966 | 7mer-m8 | -0.12 | 75 | -0.05 | 0     | N/A   |
| 1966-1972 | 7mer-m8 | -0.02 | 58 | -0.01 | 0     | N/A   |
| 1977-1983 | 7mer-m8 | -0.06 | 37 | -0.03 | 0.017 | N/A   |
| 1979-1985 | 7mer-1A | -0.03 | 21 | -0.01 | 0.017 | N/A   |
| 1980-1986 | 7mer-m8 | -0.02 | 35 | -0.01 | 0     | N/A   |
| 1989-1995 | 7mer-m8 | -0.02 | 26 | -0.01 | 0     | N/A   |
| 1990-1996 | 7mer-m8 | -0.02 | 11 | -0.01 | 0.254 | < 0.1 |
| 1991-1997 | 7mer-m8 | -0.02 | 49 | -0.01 | 0.254 | < 0.1 |
| 1994-2001 | 8mer    | -0.03 | 65 | -0.01 | 0     | N/A   |
| 1995-2001 | 7mer-1A | -0.01 | 33 | 0     | 0     | N/A   |
| 2008-2014 | 7mer-m8 | -0.15 | 71 | -0.06 | 0     | N/A   |
| 2014-2021 | 8mer    | -0.18 | 87 | -0.08 | 0     | N/A   |
| 2015-2021 | 7mer-1A | -0.16 | 88 | -0.07 | 0     | N/A   |
| 2015-2021 | 7mer-1A | -0.11 | 75 | -0.05 | 0     | N/A   |
| 2016-2022 | 7mer-m8 | -0.14 | 82 | -0.06 | 0.145 | N/A   |
| 2016-2022 | 7mer-m8 | -0.13 | 80 | -0.05 | 0.145 | N/A   |
| 2018-2024 | 7mer-m8 | -0.02 | 69 | -0.01 | 0     | N/A   |
| 2019-2026 | 8mer    | -0.03 | 52 | -0.01 | 0     | N/A   |
| 2020-2026 | 7mer-1A | -0.07 | 71 | -0.03 | 0     | N/A   |
| 2020-2026 | 7mer-m8 | -0.02 | 36 | -0.01 | 0     | N/A   |
| 2025-2031 | 7mer-m8 | -0.14 | 82 | -0.06 | 0     | N/A   |
| 2033-2039 | 7mer-1A | -0.01 | 21 | -0.01 | 0     | N/A   |
| 2033-2039 | 7mer-1A | -0.01 | 17 | 0     | 0     | N/A   |
| 2036-2042 | 7mer-1A | -0.01 | 40 | 0     | 0     | N/A   |
| 2038-2044 | 7mer-m8 | -0.02 | 39 | -0.01 | 0     | N/A   |
| 2039-2045 | 7mer-m8 | -0.12 | 84 | -0.05 | 0     | N/A   |
| 2039-2045 | 7mer-m8 | -0.1  | 80 | -0.04 | 0     | N/A   |
| 2041-2047 | 7mer-m8 | -0.02 | 46 | -0.01 | 0     | N/A   |

|           |         |       |    |       |       |       |
|-----------|---------|-------|----|-------|-------|-------|
| 2043-2049 | 7mer-m8 | -0.06 | 63 | -0.03 | 0     | N/A   |
| 2043-2049 | 7mer-1A | -0.07 | 55 | -0.03 | 0     | N/A   |
| 2046-2052 | 7mer-m8 | -0.02 | 39 | -0.01 | 0     | N/A   |
| 2048-2054 | 7mer-m8 | -0.04 | 53 | -0.02 | 0     | N/A   |
| 2052-2058 | 7mer-m8 | -0.12 | 78 | -0.05 | 0     | N/A   |
| 2053-2059 | 7mer-m8 | -0.02 | 17 | -0.01 | 0     | N/A   |
| 2057-2064 | 8mer    | -0.03 | 59 | -0.01 | 0.155 | N/A   |
| 2058-2064 | 7mer-1A | -0.01 | 31 | 0     | 0     | N/A   |
| 2061-2067 | 7mer-m8 | -0.03 | 45 | -0.01 | 0     | N/A   |
| 2069-2075 | 7mer-m8 | -0.02 | 39 | -0.01 | 0     | N/A   |
| 2071-2077 | 7mer-m8 | -0.15 | 74 | -0.06 | 0.017 | N/A   |
| 2071-2077 | 7mer-m8 | -0.15 | 74 | -0.06 | 0.017 | N/A   |
| 2073-2079 | 7mer-m8 | -0.22 | 88 | -0.09 | 0     | N/A   |
| 2079-2085 | 7mer-m8 | -0.08 | 79 | -0.03 | 0     | N/A   |
| 2081-2087 | 7mer-m8 | -0.07 | 55 | -0.03 | 0     | N/A   |
| 2083-2089 | 7mer-m8 | -0.07 | 67 | -0.03 | 0.042 | < 0.1 |
| 2083-2089 | 7mer-m8 | -0.06 | 64 | -0.03 | 0.042 | < 0.1 |
| 2083-2089 | 7mer-m8 | -0.06 | 61 | -0.03 | 0.042 | < 0.1 |
| 2086-2092 | 7mer-1A | -0.17 | 83 | -0.07 | 0.145 | N/A   |
| 2086-2092 | 7mer-m8 | -0.06 | 66 | -0.03 | 0     | N/A   |
| 2086-2092 | 7mer-m8 | -0.07 | 66 | -0.03 | 0     | N/A   |
| 2086-2092 | 7mer-m8 | -0.06 | 63 | -0.03 | 0     | N/A   |
| 2086-2092 | 7mer-1A | -0.07 | 55 | -0.03 | 0.145 | N/A   |
| 2086-2092 | 7mer-1A | -0.06 | 52 | -0.02 | 0.145 | N/A   |
| 2087-2093 | 7mer-m8 | -0.19 | 93 | -0.08 | 0.017 | N/A   |
| 2090-2096 | 7mer-m8 | -0.04 | 74 | -0.02 | 0     | N/A   |
| 2091-2098 | 8mer    | -0.07 | 74 | -0.03 | 0     | N/A   |
| 2092-2098 | 7mer-m8 | -0.04 | 58 | -0.02 | 0     | N/A   |
| 2092-2098 | 7mer-m8 | -0.02 | 53 | -0.01 | 0     | N/A   |
| 2096-2102 | 7mer-m8 | -0.11 | 79 | -0.05 | 0.083 | < 0.1 |
| 2096-2102 | 7mer-m8 | -0.09 | 75 | -0.04 | 0.083 | < 0.1 |
| 2096-2102 | 7mer-m8 | -0.09 | 74 | -0.04 | 0.083 | < 0.1 |
| 2100-2106 | 7mer-m8 | -0.11 | 81 | -0.05 | 0     | N/A   |
| 2102-2108 | 7mer-m8 | -0.22 | 88 | -0.09 | 0.155 | N/A   |
| 2102-2108 | 7mer-m8 | -0.22 | 88 | -0.09 | 0.155 | N/A   |
| 2104-2110 | 7mer-m8 | -0.21 | 87 | -0.09 | 0     | N/A   |
| 2110-2116 | 7mer-m8 | -0.11 | 86 | -0.05 | 0     | N/A   |
| 2112-2118 | 7mer-m8 | -0.09 | 67 | -0.04 | 0     | N/A   |
| 2114-2120 | 7mer-m8 | -0.09 | 73 | -0.04 | 0.017 | < 0.1 |
| 2114-2120 | 7mer-m8 | -0.08 | 71 | -0.03 | 0.017 | < 0.1 |
| 2114-2120 | 7mer-m8 | -0.08 | 69 | -0.03 | 0.017 | < 0.1 |
| 2117-2123 | 7mer-1A | -0.17 | 82 | -0.07 | 0     | N/A   |
| 2117-2123 | 7mer-m8 | -0.06 | 62 | -0.03 | 0     | N/A   |
| 2117-2123 | 7mer-m8 | -0.05 | 62 | -0.02 | 0     | N/A   |

|           |         |       |    |       |       |       |
|-----------|---------|-------|----|-------|-------|-------|
| 2117-2123 | 7mer-m8 | -0.05 | 59 | -0.02 | 0     | N/A   |
| 2117-2123 | 7mer-1A | -0.06 | 54 | -0.03 | 0     | N/A   |
| 2117-2123 | 7mer-1A | -0.05 | 50 | -0.02 | 0     | N/A   |
| 2118-2124 | 7mer-m8 | -0.17 | 92 | -0.07 | 0.017 | N/A   |
| 2121-2127 | 7mer-m8 | -0.03 | 66 | -0.01 | 0     | N/A   |
| 2122-2129 | 8mer    | -0.05 | 68 | -0.02 | 0     | N/A   |
| 2123-2129 | 7mer-m8 | -0.02 | 53 | -0.01 | 0     | N/A   |
| 2123-2129 | 7mer-m8 | -0.02 | 37 | -0.01 | 0     | N/A   |
| 2127-2133 | 7mer-m8 | -0.08 | 74 | -0.04 | 0     | N/A   |
| 2128-2134 | 7mer-m8 | -0.02 | 42 | -0.01 | 0     | N/A   |
| 2133-2139 | 7mer-m8 | -0.16 | 90 | -0.07 | 0     | < 0.1 |
| 2136-2142 | 7mer-m8 | -0.16 | 88 | -0.07 | 0     | N/A   |
| 2136-2142 | 7mer-m8 | -0.14 | 85 | -0.06 | 0     | N/A   |
| 2136-2142 | 7mer-m8 | -0.06 | 80 | -0.03 | 0     | N/A   |
| 2145-2151 | 7mer-1A | -0.18 | 84 | -0.08 | 0     | N/A   |
| 2145-2151 | 7mer-m8 | -0.09 | 73 | -0.04 | 0     | N/A   |
| 2145-2151 | 7mer-m8 | -0.06 | 65 | -0.02 | 0     | N/A   |
| 2145-2151 | 7mer-m8 | -0.06 | 63 | -0.02 | 0     | N/A   |
| 2145-2151 | 7mer-1A | -0.06 | 54 | -0.03 | 0     | N/A   |
| 2145-2151 | 7mer-1A | -0.05 | 50 | -0.02 | 0     | N/A   |
| 2146-2152 | 7mer-m8 | -0.18 | 92 | -0.08 | 0.017 | N/A   |
| 2149-2155 | 7mer-m8 | -0.02 | 66 | -0.01 | 0     | N/A   |
| 2150-2157 | 8mer    | -0.04 | 65 | -0.02 | 0     | N/A   |
| 2151-2157 | 7mer-m8 | -0.05 | 63 | -0.02 | 0     | N/A   |
| 2151-2157 | 7mer-m8 | -0.02 | 53 | -0.01 | 0     | N/A   |
| 2155-2161 | 7mer-m8 | -0.08 | 74 | -0.04 | 0     | N/A   |
| 2156-2162 | 7mer-m8 | -0.02 | 42 | -0.01 | 0     | N/A   |
| 2161-2167 | 7mer-m8 | -0.22 | 91 | -0.09 | 0     | N/A   |
| 2163-2169 | 7mer-m8 | -0.18 | 81 | -0.07 | 0     | N/A   |
| 2173-2179 | 7mer-m8 | -0.03 | 60 | -0.01 | 0     | N/A   |
| 2176-2182 | 7mer-1A | -0.18 | 84 | -0.08 | 0     | N/A   |
| 2176-2182 | 7mer-m8 | -0.1  | 78 | -0.04 | 0     | N/A   |
| 2176-2182 | 7mer-m8 | -0.07 | 71 | -0.03 | 0     | N/A   |
| 2176-2182 | 7mer-m8 | -0.07 | 69 | -0.03 | 0     | N/A   |
| 2176-2182 | 7mer-1A | -0.1  | 64 | -0.04 | 0     | N/A   |
| 2176-2182 | 7mer-1A | -0.06 | 52 | -0.03 | 0     | N/A   |
| 2177-2183 | 7mer-m8 | -0.2  | 94 | -0.08 | 0.017 | N/A   |
| 2180-2186 | 7mer-m8 | -0.07 | 82 | -0.03 | 0     | N/A   |
| 2181-2188 | 8mer    | -0.08 | 77 | -0.03 | 0     | N/A   |
| 2182-2188 | 7mer-m8 | -0.06 | 68 | -0.03 | 0     | N/A   |
| 2182-2188 | 7mer-m8 | -0.02 | 53 | -0.01 | 0     | N/A   |
| 2186-2192 | 7mer-m8 | -0.14 | 84 | -0.06 | 0.083 | < 0.1 |
| 2186-2192 | 7mer-m8 | -0.12 | 82 | -0.05 | 0.083 | < 0.1 |
| 2186-2192 | 7mer-m8 | -0.12 | 80 | -0.05 | 0.083 | < 0.1 |

|           |         |       |    |       |       |     |
|-----------|---------|-------|----|-------|-------|-----|
| 2194-2200 | 7mer-m8 | -0.16 | 83 | -0.07 | 0.145 | N/A |
| 2194-2200 | 7mer-m8 | -0.15 | 78 | -0.07 | 0.145 | N/A |
| 2203-2210 | 8mer    | -0.24 | 97 | -0.1  | 0     | N/A |
| 2210-2216 | 7mer-m8 | -0.07 | 73 | -0.03 | 0     | N/A |
| 2210-2216 | 7mer-1A | -0.04 | 63 | -0.02 | 0     | N/A |
| 2210-2216 | 7mer-m8 | -0.02 | 53 | -0.01 | 0     | N/A |
| 2213-2220 | 8mer    | -0.22 | 88 | -0.09 | 0     | N/A |
| 2213-2220 | 8mer    | -0.22 | 87 | -0.09 | 0     | N/A |
| 2214-2220 | 7mer-1A | -0.02 | 40 | -0.01 | 0     | N/A |
| 2216-2222 | 7mer-m8 | -0.03 | 45 | -0.01 | 0     | N/A |
| 2216-2222 | 7mer-m8 | -0.02 | 38 | -0.01 | 0     | N/A |
| 2216-2222 | 7mer-1A | -0.01 | 24 | 0     | 0.017 | N/A |
| 2216-2222 | 7mer-1A | -0.01 | 21 | 0     | 0.017 | N/A |
| 2220-2226 | 7mer-1A | -0.01 | 40 | 0     | 0     | N/A |
| 2220-2226 | 7mer-1A | -0.01 | 34 | 0     | 0.017 | N/A |
| 2226-2233 | 8mer    | -0.04 | 71 | -0.02 | 0     | N/A |
| 2227-2233 | 7mer-1A | -0.17 | 84 | -0.07 | 0     | N/A |
| 2227-2233 | 7mer-1A | -0.16 | 82 | -0.07 | 0     | N/A |
| 2227-2233 | 7mer-1A | -0.13 | 81 | -0.05 | 0     | N/A |
| 2227-2233 | 7mer-1A | -0.12 | 72 | -0.05 | 0     | N/A |
| 2227-2233 | 7mer-1A | -0.1  | 66 | -0.04 | 0     | N/A |
| 2227-2233 | 7mer-m8 | -0.04 | 45 | -0.02 | 0     | N/A |
| 2227-2233 | 7mer-m8 | -0.04 | 45 | -0.02 | 0     | N/A |
| 2227-2233 | 7mer-m8 | -0.04 | 43 | -0.02 | 0     | N/A |
| 2227-2233 | 7mer-m8 | -0.03 | 38 | -0.01 | 0     | N/A |
| 2227-2233 | 7mer-m8 | -0.02 | 30 | -0.01 | 0     | N/A |
| 2227-2233 | 7mer-m8 | -0.02 | 29 | -0.01 | 0     | N/A |
| 2227-2233 | 7mer-m8 | -0.02 | 29 | -0.01 | 0     | N/A |
| 2228-2234 | 7mer-m8 | -0.02 | 45 | -0.01 | 0.017 | N/A |
| 2230-2236 | 7mer-m8 | -0.04 | 48 | -0.02 | 0     | N/A |
| 2230-2236 | 7mer-m8 | -0.03 | 40 | -0.01 | 0     | N/A |
| 2234-2240 | 7mer-m8 | -0.2  | 76 | -0.08 | 0     | N/A |
| 2239-2245 | 7mer-1A | -0.08 | 49 | -0.03 | 0     | N/A |
| 2241-2247 | 7mer-m8 | -0.02 | 24 | -0.01 | 0     | N/A |
| 2241-2247 | 7mer-m8 | -0.02 | 22 | -0.01 | 0     | N/A |
| 2248-2254 | 7mer-m8 | -0.05 | 25 | -0.02 | 0     | N/A |
| 2251-2258 | 8mer    | -0.03 | 52 | -0.01 | 0     | N/A |
| 2252-2258 | 7mer-m8 | -0.02 | 29 | -0.01 | 0     | N/A |
| 2252-2258 | 7mer-1A | -0.01 | 29 | 0     | 0     | N/A |
| 2256-2262 | 7mer-m8 | -0.09 | 76 | -0.04 | 0     | N/A |
| 2257-2264 | 8mer    | -0.03 | 63 | -0.01 | 0     | N/A |
| 2260-2266 | 7mer-1A | -0.02 | 34 | -0.01 | 0.155 | N/A |
| 2262-2268 | 7mer-1A | -0.04 | 48 | -0.02 | 0     | N/A |
| 2271-2277 | 7mer-m8 | -0.02 | 29 | -0.01 | 0     | N/A |

|           |         |       |    |       |       |       |
|-----------|---------|-------|----|-------|-------|-------|
| 2272-2278 | 7mer-m8 | -0.02 | 49 | -0.01 | 0     | N/A   |
| 2272-2278 | 7mer-m8 | -0.02 | 49 | -0.01 | 0     | N/A   |
| 2274-2280 | 7mer-1A | -0.01 | 50 | 0     | 0     | N/A   |
| 2274-2280 | 7mer-m8 | -0.02 | 20 | -0.01 | 0     | N/A   |
| 2276-2282 | 7mer-m8 | -0.04 | 54 | -0.02 | 0     | N/A   |
| 2280-2287 | 8mer    | -0.06 | 59 | -0.02 | 0     | N/A   |
| 2281-2287 | 7mer-1A | -0.17 | 82 | -0.07 | 0     | N/A   |
| 2281-2287 | 7mer-m8 | -0.02 | 43 | -0.01 | 0     | N/A   |
| 2283-2290 | 8mer    | -0.03 | 53 | -0.01 | 0.017 | N/A   |
| 2284-2291 | 8mer    | -0.03 | 50 | -0.01 | 0     | N/A   |
| 2284-2290 | 7mer-1A | -0.01 | 27 | 0     | 0.017 | N/A   |
| 2288-2294 | 7mer-m8 | -0.07 | 72 | -0.03 | 0     | N/A   |
| 2290-2297 | 8mer    | -0.03 | 59 | -0.01 | 0.379 | < 0.1 |
| 2290-2297 | 8mer    | -0.03 | 44 | -0.01 | 0.379 | < 0.1 |
| 2294-2300 | 7mer-1A | -0.08 | 70 | -0.04 | 0     | N/A   |
| 2294-2300 | 7mer-1A | -0.02 | 45 | -0.01 | 0.76  | N/A   |
| 2296-2302 | 7mer-m8 | -0.02 | 47 | -0.01 | 0.017 | N/A   |
| 2301-2307 | 7mer-1A | -0.01 | 41 | 0     | 0     | N/A   |
| 2301-2307 | 7mer-1A | -0.01 | 40 | 0     | 0     | N/A   |
| 2303-2309 | 7mer-1A | -0.06 | 70 | -0.02 | 0     | N/A   |
| 2304-2310 | 7mer-1A | -0.04 | 58 | -0.02 | 0     | N/A   |
| 2305-2312 | 8mer    | -0.03 | 33 | -0.01 | 0     | N/A   |
| 2306-2312 | 7mer-m8 | -0.04 | 69 | -0.02 | 0     | N/A   |
| 2306-2312 | 7mer-m8 | -0.02 | 66 | -0.01 | 0     | N/A   |
| 2307-2313 | 7mer-m8 | -0.02 | 32 | -0.01 | 0     | N/A   |
| 2308-2315 | 8mer    | -0.11 | 79 | -0.05 | 0     | N/A   |
| 2311-2317 | 7mer-m8 | -0.08 | 64 | -0.03 | 0     | N/A   |
| 2312-2318 | 7mer-m8 | -0.04 | 52 | -0.02 | 0     | N/A   |
| 2313-2319 | 7mer-m8 | -0.19 | 77 | -0.08 | 0     | N/A   |
| 2314-2320 | 7mer-m8 | -0.12 | 71 | -0.05 | 0     | N/A   |
| 2317-2323 | 7mer-m8 | -0.35 | 87 | -0.14 | 0     | N/A   |
| 2318-2324 | 7mer-m8 | -0.27 | 81 | -0.11 | 0     | N/A   |
| 2320-2326 | 7mer-1A | -0.13 | 51 | -0.06 | 0     | N/A   |
| 2321-2328 | 8mer    | -0.03 | 56 | -0.01 | 0.017 | N/A   |
| 2321-2328 | 8mer    | -0.03 | 52 | -0.01 | 0.017 | N/A   |
| 2322-2328 | 7mer-m8 | -0.02 | 57 | -0.01 | 0     | N/A   |
| 2323-2329 | 7mer-m8 | -0.02 | 40 | -0.01 | 0     | N/A   |
| 2323-2329 | 7mer-m8 | -0.02 | 39 | -0.01 | 0     | N/A   |
| 2325-2332 | 8mer    | -0.03 | 57 | -0.01 | 0     | N/A   |
| 2326-2332 | 7mer-m8 | -0.02 | 46 | -0.01 | 0.155 | N/A   |
| 2326-2332 | 7mer-1A | -0.01 | 31 | 0     | 0     | N/A   |
| 2342-2349 | 8mer    | -0.22 | 87 | -0.09 | 0     | N/A   |
| 2344-2351 | 8mer    | -0.03 | 56 | -0.01 | 0.155 | N/A   |
| 2344-2351 | 8mer    | -0.03 | 53 | -0.01 | 0.155 | N/A   |

|           |         |       |    |       |       |     |
|-----------|---------|-------|----|-------|-------|-----|
| 2345-2351 | 7mer-1A | -0.01 | 25 | 0     | 0     | N/A |
| 2347-2353 | 7mer-1A | -0.01 | 31 | 0     | 0     | N/A |
| 2347-2353 | 7mer-1A | -0.01 | 24 | 0     | 0     | N/A |
| 2347-2353 | 7mer-1A | -0.01 | 24 | 0     | 0     | N/A |
| 2352-2358 | 7mer-m8 | -0.02 | 32 | -0.01 | 0.615 | N/A |
| 2353-2359 | 7mer-m8 | -0.06 | 78 | -0.03 | 0     | N/A |
| 2353-2359 | 7mer-m8 | -0.05 | 55 | -0.02 | 0     | N/A |
| 2354-2360 | 7mer-m8 | -0.18 | 69 | -0.08 | 0.145 | N/A |
| 2355-2361 | 7mer-m8 | -0.11 | 75 | -0.05 | 0     | N/A |
| 2355-2361 | 7mer-m8 | -0.07 | 59 | -0.03 | 0     | N/A |
| 2356-2362 | 7mer-m8 | -0.14 | 75 | -0.06 | 0.215 | N/A |
| 2356-2362 | 7mer-m8 | -0.12 | 72 | -0.05 | 0.215 | N/A |
| 2358-2364 | 7mer-m8 | -0.02 | 52 | -0.01 | 0     | N/A |
| 2360-2366 | 7mer-m8 | -0.02 | 55 | -0.01 | 0     | N/A |
| 2360-2366 | 7mer-m8 | -0.04 | 52 | -0.02 | 0     | N/A |
| 2360-2366 | 7mer-1A | -0.01 | 15 | -0.01 | 0     | N/A |
| 2360-2366 | 7mer-1A | -0.01 | 12 | 0     | 0     | N/A |
| 2362-2368 | 7mer-1A | -0.01 | 41 | 0     | 0     | N/A |
| 2362-2368 | 7mer-1A | -0.01 | 41 | 0     | 0     | N/A |
| 2363-2369 | 7mer-1A | -0.01 | 38 | 0     | 0     | N/A |
| 2376-2383 | 8mer    | -0.04 | 39 | -0.02 | 0     | N/A |
| 2376-2383 | 8mer    | -0.03 | 24 | -0.01 | 0     | N/A |
| 2378-2385 | 8mer    | -0.16 | 86 | -0.07 | 0.017 | N/A |
| 2379-2385 | 7mer-m8 | -0.02 | 51 | -0.01 | 0     | N/A |
| 2380-2386 | 7mer-m8 | -0.02 | 40 | -0.01 | 0     | N/A |
| 2395-2401 | 7mer-m8 | -0.22 | 89 | -0.09 | 0     | N/A |
| 2396-2402 | 7mer-m8 | -0.03 | 47 | -0.01 | 0     | N/A |
| 2397-2403 | 7mer-m8 | -0.07 | 60 | -0.03 | 0     | N/A |
| 2397-2403 | 7mer-m8 | -0.06 | 60 | -0.03 | 0     | N/A |
| 2403-2409 | 7mer-m8 | -0.02 | 21 | -0.01 | 0     | N/A |
| 2409-2416 | 8mer    | -0.03 | 41 | -0.01 | 0     | N/A |
| 2412-2418 | 7mer-m8 | -0.02 | 27 | -0.01 | 0.017 | N/A |
| 2413-2419 | 7mer-m8 | -0.02 | 31 | -0.01 | 0     | N/A |
| 2415-2421 | 7mer-m8 | -0.02 | 24 | -0.01 | 0.042 | N/A |
| 2420-2426 | 7mer-1A | -0.01 | 29 | 0     | 0     | N/A |
| 2420-2426 | 7mer-1A | -0.01 | 19 | 0     | 0     | N/A |
| 2423-2429 | 7mer-1A | -0.02 | 38 | -0.01 | 0     | N/A |
| 2423-2429 | 7mer-1A | -0.01 | 24 | 0     | 0     | N/A |
| 2424-2430 | 7mer-m8 | -0.02 | 41 | -0.01 | 0     | N/A |
| 2425-2431 | 7mer-m8 | -0.02 | 41 | -0.01 | 0.33  | N/A |
| 2425-2431 | 7mer-m8 | -0.02 | 31 | -0.01 | 0.33  | N/A |
| 2428-2434 | 7mer-m8 | -0.02 | 16 | -0.01 | 0.155 | N/A |
| 2429-2435 | 7mer-m8 | -0.02 | 17 | -0.01 | 0     | N/A |
| 2431-2437 | 7mer-m8 | -0.02 | 63 | -0.01 | 0     | N/A |

|           |         |       |    |       |       |       |
|-----------|---------|-------|----|-------|-------|-------|
| 2432-2438 | 7mer-m8 | -0.02 | 23 | -0.01 | 0     | N/A   |
| 2433-2439 | 7mer-m8 | -0.02 | 28 | -0.01 | 0     | N/A   |
| 2434-2440 | 7mer-m8 | -0.02 | 39 | -0.01 | 0     | N/A   |
| 2438-2444 | 7mer-m8 | -0.02 | 38 | -0.01 | 0     | N/A   |
| 2439-2445 | 7mer-m8 | -0.02 | 9  | -0.01 | 0.698 | N/A   |
| 2442-2448 | 7mer-1A | -0.02 | 15 | -0.01 | 0     | N/A   |
| 2456-2462 | 7mer-m8 | -0.2  | 72 | -0.08 | 0     | N/A   |
| 2464-2470 | 7mer-m8 | -0.02 | 35 | -0.01 | 0     | N/A   |
| 2464-2470 | 7mer-1A | -0.01 | 33 | 0     | 0.083 | < 0.1 |
| 2464-2470 | 7mer-1A | -0.01 | 20 | 0     | 0.083 | < 0.1 |
| 2464-2470 | 7mer-1A | -0.01 | 20 | 0     | 0.083 | < 0.1 |
| 2464-2470 | 7mer-1A | -0.01 | 10 | 0     | 0.017 | N/A   |
| 2465-2471 | 7mer-m8 | -0.02 | 29 | -0.01 | 0     | N/A   |
| 2469-2475 | 7mer-m8 | -0.03 | 61 | -0.01 | 0     | N/A   |
| 2473-2479 | 7mer-m8 | -0.12 | 84 | -0.05 | 0.642 | < 0.1 |
| 2473-2479 | 7mer-m8 | -0.12 | 84 | -0.05 | 0.642 | < 0.1 |
| 2473-2479 | 7mer-m8 | -0.1  | 80 | -0.04 | 0.642 | < 0.1 |
| 2474-2480 | 7mer-m8 | -0.02 | 33 | -0.01 | 0     | N/A   |
| 2480-2486 | 7mer-m8 | -0.07 | 64 | -0.03 | 0     | N/A   |
| 2481-2487 | 7mer-m8 | -0.04 | 53 | -0.02 | 1     | N/A   |
| 2482-2488 | 7mer-m8 | -0.03 | 51 | -0.01 | 0.145 | N/A   |
| 2483-2489 | 7mer-m8 | -0.06 | 63 | -0.03 | 0     | N/A   |
| 2492-2499 | 8mer    | -0.03 | 45 | -0.01 | 0     | N/A   |
| 2493-2499 | 7mer-m8 | -0.02 | 62 | -0.01 | 0     | N/A   |
| 2494-2500 | 7mer-m8 | -0.02 | 74 | -0.01 | 0.083 | N/A   |
| 2495-2501 | 7mer-m8 | -0.02 | 23 | -0.01 | 0     | N/A   |
| 2498-2504 | 7mer-m8 | -0.02 | 41 | -0.01 | 0     | N/A   |
| 2499-2505 | 7mer-m8 | -0.02 | 36 | -0.01 | 0     | N/A   |
| 2502-2508 | 7mer-m8 | -0.08 | 70 | -0.03 | 0     | N/A   |
| 2512-2518 | 7mer-m8 | -0.02 | 31 | -0.01 | 0     | N/A   |
| 2513-2519 | 7mer-m8 | -0.02 | 65 | -0.01 | 0     | N/A   |
| 2513-2519 | 7mer-m8 | -0.02 | 55 | -0.01 | 0     | N/A   |
| 2514-2520 | 7mer-m8 | -0.02 | 32 | -0.01 | 0.145 | N/A   |
| 2514-2520 | 7mer-m8 | -0.02 | 28 | -0.01 | 0.145 | N/A   |
| 2515-2521 | 7mer-m8 | -0.1  | 73 | -0.04 | 0     | N/A   |
| 2516-2522 | 7mer-m8 | -0.02 | 39 | -0.01 | 0     | N/A   |
| 2530-2536 | 7mer-m8 | -0.23 | 90 | -0.09 | 0.017 | N/A   |
| 2538-2544 | 7mer-m8 | -0.02 | 48 | -0.01 | 0     | N/A   |
| 2538-2544 | 7mer-1A | -0.03 | 35 | -0.01 | 0     | N/A   |
| 2540-2546 | 7mer-m8 | -0.17 | 87 | -0.07 | 0     | N/A   |
| 2541-2547 | 7mer-m8 | -0.02 | 53 | -0.01 | 0     | N/A   |
| 2543-2549 | 7mer-1A | -0.01 | 38 | 0     | 0.017 | N/A   |
| 2543-2549 | 7mer-1A | -0.01 | 31 | 0     | 0.042 | < 0.1 |
| 2543-2549 | 7mer-1A | -0.01 | 31 | 0     | 0.042 | < 0.1 |

|           |         |       |    |       |       |     |      |
|-----------|---------|-------|----|-------|-------|-----|------|
| 2545-2551 | 7mer-1A | -0.01 | 29 | 0     | 0     | N/A |      |
| 2551-2557 | 7mer-m8 | -0.19 | 80 | -0.08 | 0     | N/A |      |
| 2553-2559 | 7mer-1A | -0.17 | 63 | -0.07 | 0     | N/A |      |
| 2557-2563 | 7mer-1A | -0.01 | 53 | 0     | 0     | N/A |      |
| 2557-2563 | 7mer-1A | -0.01 | 37 | 0     | 0     | N/A |      |
| 2560-2566 | 7mer-m8 | -0.02 | 22 | -0.01 | 0.145 | N/A |      |
| 2562-2568 | 7mer-m8 | -0.02 | 35 | -0.01 | 0     | N/A |      |
| 2562-2568 | 7mer-m8 | -0.02 | 32 | -0.01 | 0     | N/A |      |
| 2565-2571 | 7mer-m8 | -0.18 | 85 | -0.08 | 1.629 |     | 0.19 |
| 2565-2571 | 7mer-m8 | -0.17 | 83 | -0.07 | 1.629 |     | 0.19 |
| 2565-2571 | 7mer-m8 | -0.17 | 83 | -0.07 | 1.629 |     | 0.19 |
| 2565-2571 | 7mer-m8 | -0.16 | 81 | -0.07 | 1.629 |     | 0.19 |
| 2565-2571 | 7mer-m8 | -0.14 | 80 | -0.06 | 1.629 |     | 0.19 |
| 2565-2571 | 7mer-m8 | -0.12 | 77 | -0.05 | 1.629 |     | 0.19 |
| 2565-2571 | 7mer-m8 | -0.12 | 76 | -0.05 | 1.629 |     | 0.19 |
| 2568-2574 | 7mer-m8 | -0.15 | 80 | -0.06 | 1.629 |     | 0.19 |
| 2568-2574 | 7mer-m8 | -0.15 | 80 | -0.06 | 1.629 |     | 0.19 |
| 2568-2574 | 7mer-m8 | -0.12 | 76 | -0.05 | 1.629 |     | 0.19 |
| 2568-2574 | 7mer-m8 | -0.11 | 74 | -0.05 | 1.629 |     | 0.19 |
| 2568-2574 | 7mer-m8 | -0.11 | 74 | -0.05 | 1.629 |     | 0.19 |
| 2568-2574 | 7mer-m8 | -0.1  | 72 | -0.04 | 1.629 |     | 0.19 |
| 2568-2574 | 7mer-m8 | -0.08 | 67 | -0.03 | 1.629 |     | 0.19 |
| 2574-2581 | 8mer    | -0.03 | 46 | -0.01 | 0     | N/A |      |
| 2575-2581 | 7mer-1A | -0.04 | 59 | -0.02 | 0     | N/A |      |
| 2575-2581 | 7mer-1A | -0.03 | 51 | -0.01 | 0     | N/A |      |
| 2575-2581 | 7mer-1A | -0.01 | 48 | 0     | 0     | N/A |      |
| 2575-2581 | 7mer-1A | -0.01 | 48 | 0     | 0     | N/A |      |
| 2576-2582 | 7mer-1A | -0.01 | 34 | 0     | 0     | N/A |      |
| 2583-2589 | 7mer-1A | -0.02 | 50 | -0.01 | 0.017 | N/A |      |
| 2588-2594 | 7mer-m8 | -0.11 | 80 | -0.05 | 0.737 | N/A |      |
| 2593-2599 | 7mer-m8 | -0.21 | 76 | -0.09 | 0.998 | N/A |      |
| 2616-2623 | 8mer    | -0.33 | 95 | -0.13 | 0     | N/A |      |
| 2616-2623 | 8mer    | -0.27 | 93 | -0.11 | 0     | N/A |      |
| 2616-2622 | 7mer-1A | -0.1  | 59 | -0.04 | 0.97  | N/A |      |
| 2618-2624 | 7mer-m8 | -0.12 | 81 | -0.05 | 0.017 | N/A |      |
| 2618-2624 | 7mer-m8 | -0.07 | 70 | -0.03 | 0.017 | N/A |      |
| 2622-2628 | 7mer-m8 | -0.02 | 29 | -0.01 | 0.698 | N/A |      |
| 2622-2628 | 7mer-m8 | -0.02 | 27 | -0.01 | 0.698 | N/A |      |
| 2624-2630 | 7mer-1A | -0.1  | 49 | -0.04 | 0     | N/A |      |
| 2624-2630 | 7mer-1A | -0.01 | 12 | 0     | 0     | N/A |      |
| 2625-2632 | 8mer    | -0.03 | 41 | -0.01 | 0     | N/A |      |
| 2626-2632 | 7mer-1A | -0.08 | 68 | -0.03 | 0.145 | N/A |      |
| 2629-2635 | 7mer-m8 | -0.05 | 62 | -0.02 | 0.017 | N/A |      |
| 2647-2653 | 7mer-m8 | -0.02 | 51 | -0.01 | 0.017 | N/A |      |

|           |         |       |    |       |       |       |
|-----------|---------|-------|----|-------|-------|-------|
| 2652-2658 | 7mer-m8 | -0.13 | 64 | -0.06 | 0     | N/A   |
| 2654-2660 | 7mer-m8 | -0.02 | 65 | -0.01 | 0     | N/A   |
| 2654-2660 | 7mer-m8 | -0.02 | 55 | -0.01 | 0     | N/A   |
| 2655-2662 | 8mer    | -0.03 | 48 | -0.01 | 0.145 | N/A   |
| 2655-2662 | 8mer    | -0.03 | 44 | -0.01 | 0.145 | N/A   |
| 2661-2667 | 7mer-m8 | -0.11 | 73 | -0.05 | 0     | N/A   |
| 2662-2668 | 7mer-m8 | -0.12 | 55 | -0.05 | 0     | N/A   |
| 2662-2668 | 7mer-m8 | -0.11 | 51 | -0.05 | 0     | N/A   |
| 2667-2673 | 7mer-m8 | -0.07 | 30 | -0.03 | 0.145 | N/A   |
| 2670-2676 | 7mer-m8 | -0.02 | 24 | -0.01 | 0.155 | N/A   |
| 2674-2680 | 7mer-m8 | -0.2  | 91 | -0.09 | 0     | N/A   |
| 2681-2687 | 7mer-m8 | -0.02 | 28 | -0.01 | 0.261 | N/A   |
| 2683-2690 | 8mer    | -0.03 | 49 | -0.01 | 0     | N/A   |
| 2684-2690 | 7mer-1A | -0.01 | 33 | 0     | 0     | N/A   |
| 2687-2693 | 7mer-m8 | -0.02 | 31 | -0.01 | 0     | N/A   |
| 2688-2694 | 7mer-m8 | -0.14 | 68 | -0.06 | 0     | N/A   |
| 2689-2695 | 7mer-m8 | -0.09 | 65 | -0.04 | 0     | N/A   |
| 2690-2696 | 7mer-m8 | -0.02 | 41 | -0.01 | 0     | N/A   |
| 2691-2697 | 7mer-m8 | -0.13 | 77 | -0.06 | 0.017 | N/A   |
| 2694-2700 | 7mer-m8 | -0.02 | 60 | -0.01 | 0.882 | N/A   |
| 2697-2703 | 7mer-1A | -0.01 | 27 | 0     | 0     | N/A   |
| 2710-2716 | 7mer-m8 | -0.02 | 27 | -0.01 | 0.155 | N/A   |
| 2714-2720 | 7mer-m8 | -0.14 | 59 | -0.06 | 0     | N/A   |
| 2716-2722 | 7mer-m8 | -0.04 | 33 | -0.02 | 0.017 | N/A   |
| 2716-2722 | 7mer-m8 | -0.04 | 33 | -0.02 | 0.017 | N/A   |
| 2717-2723 | 7mer-m8 | -0.02 | 38 | -0.01 | 0     | N/A   |
| 2724-2731 | 8mer    | -0.24 | 91 | -0.1  | 0.155 | N/A   |
| 2724-2731 | 8mer    | -0.19 | 85 | -0.08 | 0.155 | N/A   |
| 2725-2731 | 7mer-1A | -0.01 | 25 | 0     | 0     | N/A   |
| 2725-2731 | 7mer-1A | -0.01 | 21 | 0     | 0     | N/A   |
| 2726-2732 | 7mer-1A | -0.01 | 35 | 0     | 0     | N/A   |
| 2726-2732 | 7mer-1A | -0.01 | 32 | 0     | 0     | N/A   |
| 2727-2733 | 7mer-1A | -0.01 | 21 | 0     | 0     | N/A   |
| 2732-2739 | 8mer    | -0.03 | 59 | -0.01 | 0.032 | < 0.1 |
| 2732-2739 | 8mer    | -0.03 | 44 | -0.01 | 0.032 | < 0.1 |
| 2737-2743 | 7mer-1A | -0.03 | 49 | -0.01 | 0     | N/A   |
| 2738-2744 | 7mer-m8 | -0.02 | 47 | -0.01 | 0     | N/A   |
| 2738-2744 | 7mer-m8 | -0.02 | 45 | -0.01 | 0     | N/A   |
| 2739-2745 | 7mer-m8 | -0.06 | 50 | -0.03 | 0     | N/A   |
| 2742-2748 | 7mer-m8 | -0.12 | 54 | -0.05 | 0     | N/A   |
| 2745-2751 | 7mer-m8 | -0.02 | 34 | -0.01 | 0     | N/A   |
| 2745-2751 | 7mer-m8 | -0.02 | 22 | -0.01 | 0     | N/A   |
| 2747-2753 | 7mer-m8 | -0.02 | 22 | -0.01 | 0     | N/A   |
| 2748-2754 | 7mer-m8 | -0.02 | 16 | -0.01 | 0     | N/A   |

|           |         |       |    |       |       |     |      |
|-----------|---------|-------|----|-------|-------|-----|------|
| 2752-2758 | 7mer-m8 | -0.13 | 58 | -0.05 | 0     | N/A |      |
| 2767-2773 | 7mer-m8 | -0.02 | 0  | -0.01 | 0     | N/A |      |
| 2770-2776 | 7mer-m8 | -0.02 | 52 | -0.01 | 0     | N/A |      |
| 2773-2779 | 7mer-m8 | -0.02 | 38 | -0.01 | 0     | N/A |      |
| 2775-2781 | 7mer-m8 | -0.02 | 35 | -0.01 | 0     | N/A |      |
| 2775-2781 | 7mer-1A | -0.01 | 15 | 0     | 0     | N/A |      |
| 2776-2782 | 7mer-m8 | -0.02 | 63 | -0.01 | 0.339 | N/A |      |
| 2787-2793 | 7mer-m8 | -0.02 | 63 | -0.01 | 0     | N/A |      |
| 2787-2793 | 7mer-1A | -0.01 | 28 | 0     | 0     | N/A |      |
| 2790-2796 | 7mer-m8 | -0.02 | 32 | -0.01 | 0     | N/A |      |
| 2791-2797 | 7mer-m8 | -0.06 | 67 | -0.03 | 0     | N/A |      |
| 2793-2799 | 7mer-m8 | -0.08 | 76 | -0.04 | 0     | N/A |      |
| 2796-2802 | 7mer-m8 | -0.33 | 92 | -0.14 | 0     | N/A |      |
| 2802-2808 | 7mer-m8 | -0.03 | 38 | -0.01 | 0     | N/A |      |
| 2805-2811 | 7mer-m8 | -0.02 | 45 | -0.01 | 0.017 | N/A |      |
| 2807-2813 | 7mer-1A | -0.05 | 72 | -0.02 | 0     | N/A |      |
| 2807-2813 | 7mer-1A | -0.07 | 69 | -0.03 | 0     | N/A |      |
| 2807-2813 | 7mer-1A | -0.04 | 60 | -0.02 | 0     | N/A |      |
| 2807-2813 | 7mer-m8 | -0.04 | 50 | -0.02 | 0     | N/A |      |
| 2807-2813 | 7mer-m8 | -0.03 | 44 | -0.01 | 0     | N/A |      |
| 2810-2816 | 7mer-1A | -0.01 | 40 | -0.01 | 0     | N/A |      |
| 2810-2816 | 7mer-1A | -0.01 | 33 | 0     | 0     | N/A |      |
| 2810-2816 | 7mer-m8 | -0.02 | 27 | -0.01 | 0     | N/A |      |
| 2812-2818 | 7mer-m8 | -0.02 | 45 | -0.01 | 0     | N/A |      |
| 2812-2818 | 7mer-1A | -0.01 | 17 | 0     | 0.145 | N/A |      |
| 2813-2819 | 7mer-m8 | -0.02 | 43 | -0.01 | 0     | N/A |      |
| 2816-2822 | 7mer-m8 | -0.02 | 50 | -0.01 | 0.145 | N/A |      |
| 2816-2822 | 7mer-m8 | -0.02 | 34 | -0.01 | 0.145 | N/A |      |
| 2822-2828 | 7mer-m8 | -0.05 | 59 | -0.02 | 0.349 |     | 0.11 |
| 2824-2830 | 7mer-1A | -0.05 | 48 | -0.02 | 0     | N/A |      |
| 2829-2836 | 8mer    | -0.19 | 82 | -0.08 | 0.017 | N/A |      |
| 2829-2836 | 8mer    | -0.19 | 81 | -0.08 | 0.017 | N/A |      |
| 2829-2836 | 8mer    | -0.19 | 81 | -0.08 | 0.017 | N/A |      |
| 2830-2836 | 7mer-m8 | -0.02 | 29 | -0.01 | 0     | N/A |      |
| 2834-2840 | 7mer-m8 | -0.02 | 47 | -0.01 | 0     | N/A |      |
| 2836-2842 | 7mer-m8 | -0.08 | 82 | -0.04 | 0     | N/A |      |
| 2841-2847 | 7mer-1A | -0.11 | 79 | -0.05 | 0     | N/A |      |
| 2841-2848 | 8mer    | -0.04 | 75 | -0.02 | 0     | N/A |      |
| 2847-2853 | 7mer-m8 | -0.02 | 37 | -0.01 | 0     | N/A |      |
| 2848-2855 | 8mer    | -0.03 | 56 | -0.01 | 0     | N/A |      |
| 2849-2855 | 7mer-1A | -0.03 | 51 | -0.01 | 0.145 | N/A |      |
| 2851-2858 | 8mer    | -0.17 | 84 | -0.07 | 0     | N/A |      |
| 2851-2858 | 8mer    | -0.16 | 83 | -0.07 | 0     | N/A |      |
| 2852-2858 | 7mer-1A | -0.13 | 78 | -0.06 | 0     | N/A |      |

|           |         |       |    |       |       |       |
|-----------|---------|-------|----|-------|-------|-------|
| 2852-2858 | 7mer-1A | -0.02 | 39 | -0.01 | 0     | N/A   |
| 2853-2859 | 7mer-1A | -0.03 | 47 | -0.01 | 0     | N/A   |
| 2853-2859 | 7mer-1A | -0.01 | 40 | 0     | 0     | N/A   |
| 2860-2866 | 7mer-1A | -0.05 | 44 | -0.02 | 0.145 | N/A   |
| 2860-2866 | 7mer-1A | -0.05 | 41 | -0.02 | 0.145 | N/A   |
| 2865-2871 | 7mer-1A | -0.15 | 86 | -0.06 | 0     | N/A   |
| 2880-2886 | 7mer-1A | -0.18 | 69 | -0.07 | 0     | N/A   |
| 2882-2888 | 7mer-m8 | -0.16 | 87 | -0.07 | 0     | N/A   |
| 2884-2890 | 7mer-m8 | -0.08 | 88 | -0.03 | 0     | N/A   |
| 2884-2890 | 7mer-m8 | -0.06 | 84 | -0.02 | 0     | N/A   |
| 2884-2890 | 7mer-m8 | -0.11 | 84 | -0.05 | 0     | N/A   |
| 2887-2893 | 7mer-1A | -0.04 | 66 | -0.02 | 0     | N/A   |
| 2890-2897 | 8mer    | -0.1  | 62 | -0.04 | 0     | N/A   |
| 2897-2903 | 7mer-m8 | -0.21 | 88 | -0.09 | 0     | N/A   |
| 2897-2903 | 7mer-1A | -0.18 | 85 | -0.08 | 0     | N/A   |
| 2897-2903 | 7mer-1A | -0.17 | 84 | -0.07 | 0     | N/A   |
| 2899-2905 | 7mer-m8 | -0.17 | 84 | -0.07 | 0.155 | N/A   |
| 2924-2930 | 7mer-m8 | -0.02 | 36 | -0.01 | 0     | N/A   |
| 2927-2934 | 8mer    | -0.03 | 43 | -0.01 | 0     | N/A   |
| 2928-2935 | 8mer    | -0.11 | 82 | -0.05 | 0     | N/A   |
| 2929-2935 | 7mer-1A | -0.05 | 59 | -0.02 | 0.345 | N/A   |
| 2929-2935 | 7mer-1A | -0.01 | 46 | 0     | 0.345 | N/A   |
| 2930-2936 | 7mer-m8 | -0.07 | 93 | -0.03 | 0     | N/A   |
| 2933-2939 | 7mer-m8 | -0.02 | 78 | -0.01 | 0     | N/A   |
| 2933-2939 | 7mer-m8 | -0.02 | 78 | -0.01 | 0     | N/A   |
| 2933-2939 | 7mer-m8 | -0.02 | 78 | -0.01 | 0     | N/A   |
| 2934-2941 | 8mer    | -0.03 | 87 | -0.01 | 0     | N/A   |
| 2942-2948 | 7mer-m8 | -0.29 | 97 | -0.12 | 0     | N/A   |
| 2942-2948 | 7mer-1A | -0.28 | 97 | -0.12 | 0     | N/A   |
| 2942-2948 | 7mer-1A | -0.17 | 91 | -0.07 | 0     | N/A   |
| 2945-2951 | 7mer-1A | -0.01 | 33 | 0     | 0.017 | N/A   |
| 2958-2964 | 7mer-m8 | -0.02 | 36 | -0.01 | 0     | N/A   |
| 2960-2967 | 8mer    | -0.15 | 95 | -0.07 | 0.017 | N/A   |
| 2962-2968 | 7mer-1A | -0.11 | 80 | -0.05 | 0     | N/A   |
| 2963-2969 | 7mer-1A | -0.16 | 86 | -0.07 | 0     | N/A   |
| 2969-2975 | 7mer-1A | -0.09 | 94 | -0.04 | 0     | N/A   |
| 2969-2975 | 7mer-1A | -0.02 | 59 | -0.01 | 0.316 | < 0.1 |
| 2969-2975 | 7mer-1A | -0.01 | 40 | 0     | 0.316 | < 0.1 |
| 2969-2975 | 7mer-1A | -0.01 | 40 | 0     | 0.316 | < 0.1 |
| 2975-2981 | 7mer-m8 | -0.19 | 92 | -0.08 | 0.017 | N/A   |
| 2978-2984 | 7mer-1A | -0.12 | 75 | -0.05 | 0     | N/A   |
| 2979-2986 | 8mer    | -0.03 | 76 | -0.01 | 0     | N/A   |
| 2979-2985 | 7mer-1A | -0.04 | 46 | -0.02 | 0     | N/A   |
| 2986-2992 | 7mer-1A | -0.09 | 79 | -0.04 | 0     | N/A   |

2995-3002      8mer                      -0.24    98                      -0.1      0.895    N/A

**Starbase**

|                 |              |       |   |    |      |    |
|-----------------|--------------|-------|---|----|------|----|
| hsa-miR-101-3p  | MIMAT0000099 | SNHG1 | 1 | 7  | 188  | 1  |
| hsa-miR-137     | MIMAT0000429 | SNHG1 | 1 | 1  | 2    | 0  |
| hsa-miR-4735-3p | MIMAT0019861 | SNHG1 | 1 | 1  | 59   | -1 |
| hsa-miR-326     | MIMAT0000756 | SNHG1 | 2 | 4  | 101  | 8  |
| hsa-miR-16-5p   | MIMAT0000069 | SNHG1 | 1 | 3  | 3549 | 0  |
| hsa-miR-15a-5p  | MIMAT0000068 | SNHG1 | 1 | 3  | 3549 | 0  |
| hsa-miR-18a-5p  | MIMAT0000072 | SNHG1 | 1 | 6  | 127  | 0  |
| hsa-miR-376a-3p | MIMAT0000729 | SNHG1 | 1 | 13 | 958  | 1  |
| hsa-miR-376b-3p | MIMAT0002172 | SNHG1 | 1 | 13 | 958  | 1  |
| hsa-miR-154-5p  | MIMAT0000452 | SNHG1 | 3 | 8  | 204  | 3  |
| hsa-miR-377-3p  | MIMAT0000730 | SNHG1 | 2 | 10 | 3877 | 1  |
| hsa-miR-328-3p  | MIMAT0000752 | SNHG1 | 1 | 7  | 132  | 2  |
| hsa-miR-140-5p  | MIMAT0000431 | SNHG1 | 1 | 10 | 336  | 3  |
| hsa-miR-195-5p  | MIMAT0000461 | SNHG1 | 1 | 3  | 3549 | 8  |
| hsa-miR-497-5p  | MIMAT0002820 | SNHG1 | 1 | 3  | 3549 | 6  |
| hsa-miR-21-5p   | MIMAT0000076 | SNHG1 | 2 | 6  | 116  | 3  |
| hsa-miR-330-5p  | MIMAT0004693 | SNHG1 | 2 | 5  | 106  | 3  |
| hsa-miR-216b-5p | MIMAT0004959 | SNHG1 | 1 | 1  | 2    | 2  |
| hsa-miR-15b-5p  | MIMAT0000417 | SNHG1 | 1 | 3  | 3549 | 0  |
| hsa-miR-145-5p  | MIMAT0000437 | SNHG1 | 1 | 5  | 162  | 8  |
| hsa-miR-590-5p  | MIMAT0003258 | SNHG1 | 1 | 4  | 0    | 0  |
| hsa-miR-590-3p  | MIMAT0004801 | SNHG1 | 1 | 10 | 151  | 0  |
| hsa-miR-182-5p  | MIMAT0000259 | SNHG1 | 1 | 7  | 56   | 2  |
| hsa-miR-383-5p  | MIMAT0000738 | SNHG1 | 1 | 5  | 3759 | 1  |
| hsa-miR-421     | MIMAT0003339 | SNHG1 | 2 | 11 | 132  | 3  |
| hsa-miR-18b-5p  | MIMAT0001412 | SNHG1 | 1 | 6  | 127  | 2  |
| hsa-miR-424-5p  | MIMAT0001341 | SNHG1 | 1 | 3  | 3549 | 1  |

**Interaction**

|                 |
|-----------------|
| hsa-miR-4735-3p |
| hsa-miR-16-5p   |
| hsa-miR-15a-5p  |
| hsa-miR-18a-5p  |
| hsa-miR-376a-3p |
| hsa-miR-376b-3p |
| hsa-miR-328-3p  |
| hsa-miR-195-5p  |
| hsa-miR-145-5p  |
| hsa-miR-383-5p  |

|                |
|----------------|
| hsa-miR-421    |
| hsa-miR-18b-5p |
| hsa-miR-424-5p |
| hsa-miR-497-5p |
| hsa-miR-15b-5p |
