# Supplementary material for: RETRACTED ARTICLE: Long noncoding RNA SNHG1 promotes TERT expression by sponging miR-18b-5p in breast cancer
Source: Springer Nature journal article supplement (doi:10.1186/s13578-021-00675-5), 2021-08-31
Supplement: MOESM9 [file 13578_2021_675_MOESM9_ESM.pdf]

-- Input sequence -----

>Sequence

GTGGTAAGTGGCTTCGTGGTCTTTATAGCTGTTACTCTTTTGTACTTTTGTCTTTTCTTTTATTTTCTTTTGTAGCGATTGTGCGAACATAGCA  
TAGCACGCACTATGCCTTCTGTGTGTAGCTGCCTGGCCAGGGGCGACTGGCGGATAAAGTCTTGTGCGTGGCCTCGAGGCTTAAAAGTA  
GCAGTGGGGCTTTGTGAAGGACAAAATGGCGATGGCGGGCCGTGTAGGTCCCCCTTCTATGATGAGGACCTTTTACAGACCTGTACT  
GAGCTCCGTGAGGATAAATACTCTGAGGAGATGGGCCCTGCAAGCCTCTTGCTTAGCCGTCTGTTACAGAAAATAGCGTTTTTCGAAATG  
CCCTGAGTTGACCTAATGTCTTATTGGGCTCTGTCTGCAGGATTTACGCGCACGTTGGAACCGAAGAGAGCTCTGTTGTTGCAGTAAGT  
TCTTACGGCCATTTCTAATCTCTGCTCTTTCTGTTGAGTGTGTGGAAGTTGCTACGGGGATGATTTTACGAACTGAACTCTCTTTCTGAT  
GGATTAGTGGAGAAAACAGAAAATTCTGAGTAGCACTGTACTGTACGCAACAAATGTCAGGGCCCTATTGATTTGCTGAGGTGTTAGT  
GAAGGGTGTATTTTTTTCAGATGTTTACGCCACAAGACTTACTGGTGAAGGAATGGGACAAGACCCATCTTTATGCAAAGCCAGCGTT  
ACAGTAATGTTCCAGGTAGGTGTACATGTTTTATGCTCTTACAGAGGAGACCTTGTAGATAACCACTCCATGATGAACACAAAATGACA  
AGCATATGGCTGAACTTCAAGTATGTCATCTTACTACTGAGAAGTGAGAGAGAGGTCTTAAGGGTCTTTGAATGACTATTTTAGGT  
ACATAAAATGCTTCTCTGTTGTCTACAGCATCTCATAATCTATCCTGGGGAATTCAGCTGCCTCCAGGGTGAATACAGGTAATTATC  
CAAATTGGTGTATGTCATCTTTGTAATGTTCAA  
GAAAACAAGTGGCCGCGGAACAATGTTTTTGGCGCCTCCATCTTGTTCCTTCTGAAATGATTTTCTGGGGAGGAGATCGCAACCCG  
GTAACAGATCTTGTGAAGGGTGTGCTGTTACCCTCATCCATATATCGATCACGTTACTGTCAGATGATTTGAATTGATAAGCTGATGTTCT  
GTGAGGTACAAAAGTTAATAGCATGTTAGAGTCTGTAGGCAAGTGTGTTTATGAATAAGCTTCAATCCATCTAATACCTTAAAATAACT  
AATTTGCTTTCTTTCCAGGTATTCCTGATGACAGTCTGCCTCTATCTTACAGTAAGTTGTTTTTCGAATCTATGGGCCTATTATCTAATAGA  
TAACCTAGCCATTTTATATTTGTTACCAAAGCCTGCTTAACCCATAAAGTTTTCTGGTTCCTTGTCTCTGTAGTGTGTTCTAGATAGA  
TGCCCACTGATATATGCCCCTTTTTCTCAGATAGATGCCCACTGATCTGCCAGGGTACAGCAATGCTGTGAGTTGAGCTTTCCAGGA  
TTCTGCTCAATGAGGAGGAAACATCCTGCCTTACCCTGTTTTAGCCTGGGAACCAGTAATTGTGAACTACCAGGGTAAACATGAAGAG  
GGCATGAGAGCTTATCCATAAGGAATTGTCTGAGACATTTGGTTACCTTTTCTAGTTTGTCCATTAGCAACCGTAACTAAAATAGTTTTGG  
CTGTTTGGGATAATTAGCTAATTGAATGATTTTTGATTACAGGAGCAGCTGTTGCTATATAACCATTGAAAAGCCTTACAGAGCTGAGAGGTTA  
GTTGATATTTTTGTTCTTACAGCTTATGCCACCAAGTAGGCAGTTTCTATGATGAATCAAAGTACTACTATGACCGACAGTGAAAATAC  
ATGAACACCTGAGAACTGGAGAACGCAGGGAGTGGGGGTAACCATGTCTGAGGAATCTTTCACCCACAGCTTTGTTTTCTCTAGGTACT  
ACTAACC  
AATAACCTGCTGGCTCAAAGGTGAGTAATTTACCGTATTCAATGCACTCAGTATATAGGGTAGGAAAAGTGCCTTTTTAGGCCTGTGTTT  
GTGATGACTTACATGGAATCTCGTTCGGCTGATGACTTGTGTTGAGACTCTGAAACTGATTTTCTGAGAATGATGGGTGGGAACAACATAA  
TGCGGGATATGAGAAGCACTACTGACTTGGTCTTCTCTTTCAGGGCCAGCACCTTCTCTCTAAAGCCCAAGAGGAGTTGAGGTAATGG  
CTTTGCAATAGTTACCATCAATGGCTGCTATATAAAATTTTCTGTGATTTTTGTGTGTGATAGCACTGTGGTCTGGGTGAATGTACACAGACAT  
AACTGGCTTAAACCAAAGTCTTTGATCTCCTGAACCACAGTGATGAATTGCTGCTCACCAGTGATGAGTTGAATACCGCCCCAGTCTGATC  
AATGTGTGACTGAAAGTATTTTTCTGAGCTGTGAGCCTGCCTTCCAGTGACATGTTCTAAAAATTGCAAGTTATTTGAGGAGCTTTACAGC  
CAATAGGAAGTCTTGGGCTAAGTAGTGTTCCTATAAAATGTGCCCTGAAACTTCTTTCTGCCAAGCAATAGATACAATTGAGAGATTGTAA  
AATGTGACATAGAATGAAAGTCTCTCAAGACTACATTTTTCTTTCTGATTTTCTGAGGAAAAGTGGTGTCTGTGTTCACTCCAGGCTGAAGTT  
ACAGGTGAGTAAACCTAAATGTAAGGTGGACTATGCTAAAAATCCCAATGAAGAACTTTCACATGTCTTACTCTCTGCTGCTAGTCCCAGAG  
CCTGTAAAGGTGAACCCACTGGGACTGGCTGGGGGAGAAGAGGAAGATTTGTTCCAGAAGGAAGTGTCTGAGGGATGATAAAGATTCTAT  
ACAGAGAAAAGGAGTAATCATCACTGTTGAAAACATTGGTTTTATTTTTCCAGGTCTGAGCAAATAAGGTGTATAAAAAATGGTAGGTATC  
TGT  
TTAAATATTTAACTGATTTTATAATAGCAACCTTTTGTCTAGGTTACATAGTGTAAATATTGTGTTCAATTTGATTTTCCAATCCAATAAGAAC  
TTTTTTTTTACCTCGCAGGAATCTGTCTTGGAGGACATCAGAAGGTGAATTTTCCAAGTCTTGGACAACCTAGCTGTTGAAAAGCTTTCTGG  
GTTTGGGGGATTTTTCAGATGACCTTAAAGTGTAGCAGACACAGATTAAGACTGGGAGCCAATGAAACAGCAGTTGAGGGTTTGTCTGTG  
TATCACATTTCTGATTTTATCACCCCTTCTGCAACATTTATCTGGAATCTACCTGCCCTTTTGTTTTTAGATAAAGGGCTTGGTTTTGTT  
ACCCAGGCTGGTTTCAAGGCCATAGCTTTAAGAGATCTCTCACCACAGATTTCCAAAGTGTGGGATTGCAGGTGTGATTCATGGCACCCAGA  
CTTTGCTGCCTTTCTTACATGATCCAGGCCAGAACCCAACTCAGGCACTGTATAGATGACCACTTTCGTAACCTACTGACCTAGCTTGTGCC

AATTGTTGATTGAACTTCCATAAACCCTTCCGTCGTCTGTTCTCTGTATACAGCCACCTTCTGTTCCCGTCATGAGCCTTTAGGTCTCCA  
TTTGCATATTGCAAATACTATGTTCCATGTAGGTAGCTCATTGAGGCTTCTCTTCACTTCAAAAAAGGTTCCCTTGAGGACTGGCTGT  
CAATTTGTGTTGCTGTGTTGGTTGTTGATGAAAATAATAAAATGATTGATTACATA

-- Factors predicted by PROMO in this sequence -----

NAME; MATRIX\_WIDTH;

C/EBPbeta [T00581]; 4

HNF-4alpha [T03828]; 13

C/EBPalpha [T00105]; 7

XBP-1 [T00902]; 6

AP-2alphaA [T00035]; 6

GR-beta [T01920]; 5

ENKTF-1 [T00255]; 8

c-Ets-1 [T00112]; 7

Elk-1 [T00250]; 9

HNF-1C [T01951]; 9

HNF-1B [T01950]; 9

HNF-3alpha [T02512]; 8

Pax-5 [T00070]; 7

p53 [T00671]; 7

ER-alpha [T00261]; 5

NF-Y [T00150]; 8

HIF-1 [T01609]; 9

YY1 [T00915]; 4

PXR-1:RXR-alpha [T05671]; 8

FOXP3 [T04280]; 6

c-Ets-2 [T00113]; 9

RXR-alpha [T01345]; 7

TCF-4E [T02878]; 7

STAT4 [T01577]; 6

GR-alpha [T00337]; 5

VDR [T00885]; 9

IRF-2 [T01491]; 6

TCF-4 [T02918]; 10

TFII-I [T00824]; 6

GATA-1 [T00306]; 6

c-Jun [T00133]; 7

TFIID [T00820]; 7

PR B [T00696]; 7

PR A [T01661]; 7

E2F [T00221]; 10

GATA-2 [T00308]; 9

NF-AT1 [T01948]; 10

STAT1beta [T01573]; 10

PEA3 [T00685]; 9  
 T3R-beta1 [T00851]; 9  
 LEF-1 [T02905]; 8  
 NF-1 [T00539]; 8  
 NF-AT1 [T00550]; 9  
 TBP [T00794]; 10  
 c-Myb [T00137]; 8  
 Sp1 [T00759]; 10  
 RAR-beta [T00721]; 10  
 NF-AT2 [T01945]; 10  
 HNF-1A [T00368]; 8  
 POU2F1 [T00641]; 11  
 GR [T05076]; 7  
 HOXD9 [T01424]; 10  
 HOXD10 [T01425]; 10  
 Ik-1 [T02702]; 13  
 CTF [T00174]; 12  
 PPAR-alpha:RXR-alpha [T05221]; 11  
 SRY [T00997]; 9  
 E2F-1 [T01542]; 8  
 IRF-1 [T00423]; 9  
 MAZ [T00490]; 13  
 MEF-2A [T01005]; 11

-- PROMO predictions detail -----

Sequence name; Factor name; Start position; End position; Dissimilarity; String; RE equally; RE query

Sequence; C/EBPbeta [T00581]; 39; 42; 0.000000; TTGT; 30.31250; 35.69455;  
 Sequence; C/EBPbeta [T00581]; 46; 49; 0.000000; TTGT; 30.31250; 35.69455;  
 Sequence; C/EBPbeta [T00581]; 69; 72; 1.366559; TTGA; 30.31250; 34.99802;  
 Sequence; C/EBPbeta [T00581]; 77; 80; 0.000000; TTGT; 30.31250; 35.69455;  
 Sequence; C/EBPbeta [T00581]; 116; 119; 0.000000; TTGT; 30.31250; 35.69455;  
 Sequence; C/EBPbeta [T00581]; 154; 157; 0.000000; TTGT; 30.31250; 35.69455;  
 Sequence; C/EBPbeta [T00581]; 193; 196; 0.000000; TTGT; 30.31250; 35.69455;  
 Sequence; C/EBPbeta [T00581]; 202; 205; 0.000000; ACAA; 30.31250; 35.69455;  
 Sequence; C/EBPbeta [T00581]; 311; 314; 0.000000; GCAA; 30.31250; 35.69455;  
 Sequence; C/EBPbeta [T00581]; 320; 323; 0.000000; TTGC; 30.31250; 35.69455;  
 Sequence; C/EBPbeta [T00581]; 367; 370; 1.366559; TTGA; 30.31250; 34.99802;  
 Sequence; C/EBPbeta [T00581]; 383; 386; 1.639871; TTGG; 30.31250; 34.99802;  
 Sequence; C/EBPbeta [T00581]; 415; 418; 1.639871; TTGG; 30.31250; 34.99802;  
 Sequence; C/EBPbeta [T00581]; 436; 439; 0.000000; TTGT; 30.31250; 35.69455;  
 Sequence; C/EBPbeta [T00581]; 439; 442; 0.000000; TTGC; 30.31250; 35.69455;  
 Sequence; C/EBPbeta [T00581]; 483; 486; 1.366559; TTGA; 30.31250; 34.99802;  
 Sequence; C/EBPbeta [T00581]; 498; 501; 0.000000; TTGC; 30.31250; 35.69455;

Sequence; C/EBPbeta [T00581]; 588; 591; 0.000000; GCAA; 30.31250; 35.69455;  
Sequence; C/EBPbeta [T00581]; 591; 594; 0.000000; ACAA; 30.31250; 35.69455;  
Sequence; C/EBPbeta [T00581]; 609; 612; 1.366559; TTGA; 30.31250; 34.99802;  
Sequence; C/EBPbeta [T00581]; 614; 617; 0.000000; TTGT; 30.31250; 35.69455;  
Sequence; C/EBPbeta [T00581]; 662; 665; 0.000000; ACAA; 30.31250; 35.69455;  
Sequence; C/EBPbeta [T00581]; 689; 692; 0.000000; ACAA; 30.31250; 35.69455;  
Sequence; C/EBPbeta [T00581]; 706; 709; 0.000000; GCAA; 30.31250; 35.69455;  
Sequence; C/EBPbeta [T00581]; 772; 775; 0.000000; TTGT; 30.31250; 35.69455;  
Sequence; C/EBPbeta [T00581]; 798; 801; 0.000000; ACAA; 30.31250; 35.69455;  
Sequence; C/EBPbeta [T00581]; 806; 809; 0.000000; ACAA; 30.31250; 35.69455;  
Sequence; C/EBPbeta [T00581]; 826; 829; 1.366559; TCAA; 30.31250; 34.99802;  
Sequence; C/EBPbeta [T00581]; 879; 882; 1.366559; TTGA; 30.31250; 34.99802;  
Sequence; C/EBPbeta [T00581]; 919; 922; 0.000000; TTGT; 30.31250; 35.69455;  
Sequence; C/EBPbeta [T00581]; 988; 991; 1.639871; CCAA; 30.31250; 34.99802;  
Sequence; C/EBPbeta [T00581]; 993; 996; 1.639871; TTGG; 30.31250; 34.99802;  
Sequence; C/EBPbeta [T00581]; 1009; 1012; 0.000000; TTGT; 30.31250; 35.69455;  
Sequence; C/EBPbeta [T00581]; 1019; 1022; 1.366559; TCAA; 30.31250; 34.99802;  
Sequence; C/EBPbeta [T00581]; 1027; 1030; 0.000000; ACAA; 30.31250; 35.69455;  
Sequence; C/EBPbeta [T00581]; 1043; 1046; 0.000000; ACAA; 30.31250; 35.69455;  
Sequence; C/EBPbeta [T00581]; 1053; 1056; 1.639871; TTGG; 30.31250; 34.99802;  
Sequence; C/EBPbeta [T00581]; 1068; 1071; 0.000000; TTGT; 30.31250; 35.69455;  
Sequence; C/EBPbeta [T00581]; 1077; 1080; 1.366559; TTGA; 30.31250; 34.99802;  
Sequence; C/EBPbeta [T00581]; 1105; 1108; 0.000000; GCAA; 30.31250; 35.69455;  
Sequence; C/EBPbeta [T00581]; 1125; 1128; 0.000000; TTGT; 30.31250; 35.69455;  
Sequence; C/EBPbeta [T00581]; 1182; 1185; 1.366559; TTGA; 30.31250; 34.99802;  
Sequence; C/EBPbeta [T00581]; 1187; 1190; 1.366559; TTGA; 30.31250; 34.99802;  
Sequence; C/EBPbeta [T00581]; 1212; 1215; 0.000000; ACAA; 30.31250; 35.69455;  
Sequence; C/EBPbeta [T00581]; 1248; 1251; 0.000000; TTGT; 30.31250; 35.69455;  
Sequence; C/EBPbeta [T00581]; 1251; 1254; 0.000000; TTGT; 30.31250; 35.69455;  
Sequence; C/EBPbeta [T00581]; 1300; 1303; 0.000000; TTGC; 30.31250; 35.69455;  
Sequence; C/EBPbeta [T00581]; 1354; 1357; 0.000000; TTGT; 30.31250; 35.69455;  
Sequence; C/EBPbeta [T00581]; 1404; 1407; 1.366559; TTGA; 30.31250; 34.99802;  
Sequence; C/EBPbeta [T00581]; 1411; 1414; 0.000000; TTGT; 30.31250; 35.69455;  
Sequence; C/EBPbeta [T00581]; 1417; 1420; 1.639871; CCAA; 30.31250; 34.99802;  
Sequence; C/EBPbeta [T00581]; 1455; 1458; 0.000000; TTGT; 30.31250; 35.69455;  
Sequence; C/EBPbeta [T00581]; 1554; 1557; 0.000000; TTGT; 30.31250; 35.69455;  
Sequence; C/EBPbeta [T00581]; 1561; 1564; 0.000000; TTGT; 30.31250; 35.69455;  
Sequence; C/EBPbeta [T00581]; 1584; 1587; 1.639871; CCAA; 30.31250; 34.99802;  
Sequence; C/EBPbeta [T00581]; 1638; 1641; 0.000000; TTGT; 30.31250; 35.69455;  
Sequence; C/EBPbeta [T00581]; 1694; 1697; 0.000000; TTGT; 30.31250; 35.69455;  
Sequence; C/EBPbeta [T00581]; 1707; 1710; 1.639871; TTGG; 30.31250; 34.99802;  
Sequence; C/EBPbeta [T00581]; 1726; 1729; 0.000000; TTGT; 30.31250; 35.69455;  
Sequence; C/EBPbeta [T00581]; 1736; 1739; 0.000000; GCAA; 30.31250; 35.69455;  
Sequence; C/EBPbeta [T00581]; 1757; 1760; 1.639871; TTGG; 30.31250; 34.99802;

Sequence; C/EBPbeta [T00581]; 1765; 1768; 1.639871; TTGG; 30.31250; 34.99802;  
Sequence; C/EBPbeta [T00581]; 1782; 1785; 1.366559; TTGA; 30.31250; 34.99802;  
Sequence; C/EBPbeta [T00581]; 1794; 1797; 1.366559; TTGA; 30.31250; 34.99802;  
Sequence; C/EBPbeta [T00581]; 1810; 1813; 0.000000; TTGT; 30.31250; 35.69455;  
Sequence; C/EBPbeta [T00581]; 1813; 1816; 0.000000; TTGC; 30.31250; 35.69455;  
Sequence; C/EBPbeta [T00581]; 1826; 1829; 1.366559; TTGA; 30.31250; 34.99802;  
Sequence; C/EBPbeta [T00581]; 1855; 1858; 1.366559; TTGA; 30.31250; 34.99802;  
Sequence; C/EBPbeta [T00581]; 1865; 1868; 0.000000; TTGT; 30.31250; 35.69455;  
Sequence; C/EBPbeta [T00581]; 1887; 1890; 1.639871; CCAA; 30.31250; 34.99802;  
Sequence; C/EBPbeta [T00581]; 1912; 1915; 1.366559; TCAA; 30.31250; 34.99802;  
Sequence; C/EBPbeta [T00581]; 2020; 2023; 0.000000; TTGT; 30.31250; 35.69455;  
Sequence; C/EBPbeta [T00581]; 2044; 2047; 1.639871; CCAA; 30.31250; 34.99802;  
Sequence; C/EBPbeta [T00581]; 2056; 2059; 1.639871; TTGG; 30.31250; 34.99802;  
Sequence; C/EBPbeta [T00581]; 2061; 2064; 1.366559; TCAA; 30.31250; 34.99802;  
Sequence; C/EBPbeta [T00581]; 2086; 2089; 1.366559; TCAA; 30.31250; 34.99802;  
Sequence; C/EBPbeta [T00581]; 2137; 2140; 0.000000; TTGT; 30.31250; 35.69455;  
Sequence; C/EBPbeta [T00581]; 2175; 2178; 0.000000; TTGC; 30.31250; 35.69455;  
Sequence; C/EBPbeta [T00581]; 2181; 2184; 1.366559; TTGA; 30.31250; 34.99802;  
Sequence; C/EBPbeta [T00581]; 2223; 2226; 0.000000; ACAA; 30.31250; 35.69455;  
Sequence; C/EBPbeta [T00581]; 2258; 2261; 1.639871; TTGG; 30.31250; 34.99802;  
Sequence; C/EBPbeta [T00581]; 2300; 2303; 1.639871; CCAA; 30.31250; 34.99802;  
Sequence; C/EBPbeta [T00581]; 2311; 2314; 1.366559; TTGA; 30.31250; 34.99802;  
Sequence; C/EBPbeta [T00581]; 2326; 2329; 0.000000; TTGC; 30.31250; 35.69455;  
Sequence; C/EBPbeta [T00581]; 2328; 2331; 0.000000; GCAA; 30.31250; 35.69455;  
Sequence; C/EBPbeta [T00581]; 2341; 2344; 1.366559; TCAA; 30.31250; 34.99802;  
Sequence; C/EBPbeta [T00581]; 2374; 2377; 0.000000; TTGT; 30.31250; 35.69455;  
Sequence; C/EBPbeta [T00581]; 2430; 2433; 1.639871; CCAA; 30.31250; 34.99802;  
Sequence; C/EBPbeta [T00581]; 2439; 2442; 1.366559; TTGA; 30.31250; 34.99802;  
Sequence; C/EBPbeta [T00581]; 2466; 2469; 0.000000; TTGC; 30.31250; 35.69455;  
Sequence; C/EBPbeta [T00581]; 2487; 2490; 1.366559; TTGA; 30.31250; 34.99802;  
Sequence; C/EBPbeta [T00581]; 2508; 2511; 1.366559; TCAA; 30.31250; 34.99802;  
Sequence; C/EBPbeta [T00581]; 2573; 2576; 0.000000; TTGC; 30.31250; 35.69455;  
Sequence; C/EBPbeta [T00581]; 2575; 2578; 0.000000; GCAA; 30.31250; 35.69455;  
Sequence; C/EBPbeta [T00581]; 2584; 2587; 1.366559; TTGA; 30.31250; 34.99802;  
Sequence; C/EBPbeta [T00581]; 2601; 2604; 1.639871; CCAA; 30.31250; 34.99802;  
Sequence; C/EBPbeta [T00581]; 2615; 2618; 1.639871; TTGG; 30.31250; 34.99802;  
Sequence; C/EBPbeta [T00581]; 2664; 2667; 1.639871; CCAA; 30.31250; 34.99802;  
Sequence; C/EBPbeta [T00581]; 2668; 2671; 0.000000; GCAA; 30.31250; 35.69455;  
Sequence; C/EBPbeta [T00581]; 2677; 2680; 0.000000; ACAA; 30.31250; 35.69455;  
Sequence; C/EBPbeta [T00581]; 2681; 2684; 1.366559; TTGA; 30.31250; 34.99802;  
Sequence; C/EBPbeta [T00581]; 2689; 2692; 0.000000; TTGT; 30.31250; 35.69455;  
Sequence; C/EBPbeta [T00581]; 2719; 2722; 1.366559; TCAA; 30.31250; 34.99802;  
Sequence; C/EBPbeta [T00581]; 2740; 2743; 1.366559; TTGA; 30.31250; 34.99802;  
Sequence; C/EBPbeta [T00581]; 2746; 2749; 0.000000; TTGC; 30.31250; 35.69455;

Sequence; C/EBPbeta [T00581]; 2834; 2837; 1.639871; CCAA; 30.31250; 34.99802;  
Sequence; C/EBPbeta [T00581]; 2930; 2933; 0.000000; TTGT; 30.31250; 35.69455;  
Sequence; C/EBPbeta [T00581]; 2997; 3000; 0.000000; TTGT; 30.31250; 35.69455;  
Sequence; C/EBPbeta [T00581]; 3000; 3003; 1.366559; TTGA; 30.31250; 34.99802;  
Sequence; C/EBPbeta [T00581]; 3009; 3012; 1.639871; TTGG; 30.31250; 34.99802;  
Sequence; C/EBPbeta [T00581]; 3034; 3037; 0.000000; GCAA; 30.31250; 35.69455;  
Sequence; C/EBPbeta [T00581]; 3095; 3098; 0.000000; GCAA; 30.31250; 35.69455;  
Sequence; C/EBPbeta [T00581]; 3103; 3106; 0.000000; TTGC; 30.31250; 35.69455;  
Sequence; C/EBPbeta [T00581]; 3131; 3134; 0.000000; TTGT; 30.31250; 35.69455;  
Sequence; C/EBPbeta [T00581]; 3141; 3144; 0.000000; TTGT; 30.31250; 35.69455;  
Sequence; C/EBPbeta [T00581]; 3150; 3153; 1.639871; CCAA; 30.31250; 34.99802;  
Sequence; C/EBPbeta [T00581]; 3155; 3158; 1.639871; CCAA; 30.31250; 34.99802;  
Sequence; C/EBPbeta [T00581]; 3195; 3198; 1.639871; TTGG; 30.31250; 34.99802;  
Sequence; C/EBPbeta [T00581]; 3221; 3224; 1.639871; CCAA; 30.31250; 34.99802;  
Sequence; C/EBPbeta [T00581]; 3229; 3232; 1.639871; TTGG; 30.31250; 34.99802;  
Sequence; C/EBPbeta [T00581]; 3233; 3236; 0.000000; ACAA; 30.31250; 35.69455;  
Sequence; C/EBPbeta [T00581]; 3245; 3248; 1.366559; TTGA; 30.31250; 34.99802;  
Sequence; C/EBPbeta [T00581]; 3263; 3266; 1.639871; TTGG; 30.31250; 34.99802;  
Sequence; C/EBPbeta [T00581]; 3323; 3326; 1.639871; CCAA; 30.31250; 34.99802;  
Sequence; C/EBPbeta [T00581]; 3338; 3341; 1.366559; TTGA; 30.31250; 34.99802;  
Sequence; C/EBPbeta [T00581]; 3346; 3349; 0.000000; TTGC; 30.31250; 35.69455;  
Sequence; C/EBPbeta [T00581]; 3387; 3390; 0.000000; GCAA; 30.31250; 35.69455;  
Sequence; C/EBPbeta [T00581]; 3420; 3423; 0.000000; TTGT; 30.31250; 35.69455;  
Sequence; C/EBPbeta [T00581]; 3433; 3436; 0.000000; ACAA; 30.31250; 35.69455;  
Sequence; C/EBPbeta [T00581]; 3441; 3444; 1.639871; TTGG; 30.31250; 34.99802;  
Sequence; C/EBPbeta [T00581]; 3447; 3450; 0.000000; TTGT; 30.31250; 35.69455;  
Sequence; C/EBPbeta [T00581]; 3465; 3468; 1.366559; TCAA; 30.31250; 34.99802;  
Sequence; C/EBPbeta [T00581]; 3505; 3508; 1.639871; CCAA; 30.31250; 34.99802;  
Sequence; C/EBPbeta [T00581]; 3519; 3522; 0.000000; TTGC; 30.31250; 35.69455;  
Sequence; C/EBPbeta [T00581]; 3548; 3551; 0.000000; TTGC; 30.31250; 35.69455;  
Sequence; C/EBPbeta [T00581]; 3582; 3585; 1.639871; CCAA; 30.31250; 34.99802;  
Sequence; C/EBPbeta [T00581]; 3633; 3636; 0.000000; TTGT; 30.31250; 35.69455;  
Sequence; C/EBPbeta [T00581]; 3636; 3639; 0.000000; TTGC; 30.31250; 35.69455;  
Sequence; C/EBPbeta [T00581]; 3639; 3642; 1.639871; CCAA; 30.31250; 34.99802;  
Sequence; C/EBPbeta [T00581]; 3643; 3646; 0.000000; TTGT; 30.31250; 35.69455;  
Sequence; C/EBPbeta [T00581]; 3646; 3649; 1.366559; TTGA; 30.31250; 34.99802;  
Sequence; C/EBPbeta [T00581]; 3650; 3653; 1.366559; TTGA; 30.31250; 34.99802;  
Sequence; C/EBPbeta [T00581]; 3734; 3737; 0.000000; TTGC; 30.31250; 35.69455;  
Sequence; C/EBPbeta [T00581]; 3741; 3744; 0.000000; TTGC; 30.31250; 35.69455;  
Sequence; C/EBPbeta [T00581]; 3743; 3746; 0.000000; GCAA; 30.31250; 35.69455;  
Sequence; C/EBPbeta [T00581]; 3782; 3785; 0.000000; TTGC; 30.31250; 35.69455;  
Sequence; C/EBPbeta [T00581]; 3794; 3797; 1.366559; TCAA; 30.31250; 34.99802;  
Sequence; C/EBPbeta [T00581]; 3809; 3812; 1.366559; TTGA; 30.31250; 34.99802;  
Sequence; C/EBPbeta [T00581]; 3823; 3826; 1.366559; TCAA; 30.31250; 34.99802;

Sequence; C/EBPbeta [T00581]; 3828; 3831; 0.000000; TTGT; 30.31250; 35.69455;  
Sequence; C/EBPbeta [T00581]; 3833; 3836; 0.000000; TTGC; 30.31250; 35.69455;  
Sequence; C/EBPbeta [T00581]; 3841; 3844; 1.639871; TTGG; 30.31250; 34.99802;  
Sequence; C/EBPbeta [T00581]; 3845; 3848; 0.000000; TTGT; 30.31250; 35.69455;  
Sequence; C/EBPbeta [T00581]; 3848; 3851; 1.366559; TTGA; 30.31250; 34.99802;  
Sequence; C/EBPbeta [T00581]; 3869; 3872; 1.366559; TTGA; 30.31250; 34.99802;  
Sequence; HNF-4alpha [T03828]; 36; 48; 3.189869; CTTTTGACTTTG; 0.00405; 0.00649;  
Sequence; C/EBPalpha [T00105]; 75; 81; 0.540941; GATTGTG; 0.47363; 0.46224;  
Sequence; C/EBPalpha [T00105]; 381; 387; 1.761449; TATTGGG; 0.94727; 1.24098;  
Sequence; C/EBPalpha [T00105]; 607; 613; 4.235345; TATTGAT; 0.94727; 1.28112;  
Sequence; C/EBPalpha [T00105]; 1185; 1191; 4.845599; AATTGAT; 0.94727; 1.74300;  
Sequence; C/EBPalpha [T00105]; 1636; 1642; 2.371703; AATTGTG; 0.94727; 1.02907;  
Sequence; C/EBPalpha [T00105]; 2043; 2049; 4.776286; ACCAATA; 0.94727; 1.74300;  
Sequence; C/EBPalpha [T00105]; 2464; 2470; 4.845599; AATTGCT; 0.94727; 1.74300;  
Sequence; C/EBPalpha [T00105]; 2667; 2673; 4.235345; AGCAATA; 0.94727; 1.28112;  
Sequence; C/EBPalpha [T00105]; 2679; 2685; 1.830762; AATTGAG; 0.94727; 1.24098;  
Sequence; C/EBPalpha [T00105]; 2833; 2839; 2.981957; CCCAATG; 0.94727; 1.04919;  
Sequence; C/EBPalpha [T00105]; 3129; 3135; 1.761449; TATTGTG; 0.94727; 1.24098;  
Sequence; C/EBPalpha [T00105]; 3867; 3873; 3.014837; GATTGAT; 0.94727; 1.04919;  
Sequence; XBP-1 [T00902]; 104; 109; 4.894955; ATGCCT; 1.89453; 1.45995;  
Sequence; XBP-1 [T00902]; 803; 808; 1.583727; ATGACA; 1.89453; 2.07321;  
Sequence; XBP-1 [T00902]; 834; 839; 1.583727; TGTCAT; 1.89453; 2.07321;  
Sequence; XBP-1 [T00902]; 883; 888; 0.000000; ATGACT; 1.89453; 2.02935;  
Sequence; XBP-1 [T00902]; 1001; 1006; 1.583727; TGTCAT; 1.89453; 2.07321;  
Sequence; XBP-1 [T00902]; 1325; 1330; 1.583727; ATGACA; 1.89453; 2.07321;  
Sequence; XBP-1 [T00902]; 1927; 1932; 1.583727; ATGACC; 1.89453; 2.07321;  
Sequence; XBP-1 [T00902]; 2142; 2147; 0.000000; ATGACT; 1.89453; 2.02935;  
Sequence; XBP-1 [T00902]; 2170; 2175; 0.000000; ATGACT; 1.89453; 2.02935;  
Sequence; XBP-1 [T00902]; 3603; 3608; 1.583727; ATGACC; 1.89453; 2.07321;  
Sequence; XBP-1 [T00902]; 3710; 3715; 0.000000; CGTCAT; 1.89453; 2.02935;  
Sequence; AP-2alphaA [T00035]; 106; 111; 3.743866; GCCTTC; 0.94727; 0.61230;  
Sequence; AP-2alphaA [T00035]; 124; 129; 0.226186; GCCTGG; 1.89453; 0.88633;  
Sequence; AP-2alphaA [T00035]; 163; 168; 2.098119; GCCTCG; 1.89453; 0.88139;  
Sequence; AP-2alphaA [T00035]; 167; 172; 2.098119; CGAGGC; 1.89453; 0.88139;  
Sequence; AP-2alphaA [T00035]; 315; 320; 3.229049; GCCTCT; 0.94727; 0.61230;  
Sequence; AP-2alphaA [T00035]; 960; 965; 1.871933; GCCTCC; 1.89453; 0.88139;  
Sequence; AP-2alphaA [T00035]; 1058; 1063; 3.743866; GCCTTC; 0.94727; 0.61230;  
Sequence; AP-2alphaA [T00035]; 1335; 1340; 3.229049; GCCTCT; 0.94727; 0.61230;  
Sequence; AP-2alphaA [T00035]; 1422; 1427; 0.000000; GCCTGC; 1.89453; 0.88633;  
Sequence; AP-2alphaA [T00035]; 1605; 1610; 4.422424; GCCTTA; 1.89453; 1.45995;  
Sequence; AP-2alphaA [T00035]; 1622; 1627; 0.226186; GCCTGG; 1.89453; 0.88633;  
Sequence; AP-2alphaA [T00035]; 1833; 1838; 3.743866; GCCTTC; 0.94727; 0.61230;  
Sequence; AP-2alphaA [T00035]; 1891; 1896; 4.211849; GTAGGC; 1.89453; 1.24322;  
Sequence; AP-2alphaA [T00035]; 2125; 2130; 4.890408; TTAGGC; 0.94727; 0.86354;

Sequence; AP-2alphaA [T00035]; 2129; 2134; 1.357116; GCCTGT; 0.94727; 0.62593;  
Sequence; AP-2alphaA [T00035]; 2544; 2549; 0.000000; GCCTGC; 1.89453; 0.88633;  
Sequence; AP-2alphaA [T00035]; 2548; 2553; 3.743866; GCCTTC; 0.94727; 0.61230;  
Sequence; AP-2alphaA [T00035]; 2588; 2593; 1.871933; GGAGGC; 1.89453; 0.88139;  
Sequence; AP-2alphaA [T00035]; 2776; 2781; 0.226186; CCAGGC; 1.89453; 0.88633;  
Sequence; AP-2alphaA [T00035]; 2881; 2886; 1.357116; GCCTGT; 0.94727; 0.62593;  
Sequence; AP-2alphaA [T00035]; 3454; 3459; 0.226186; CCAGGC; 1.89453; 0.88633;  
Sequence; AP-2alphaA [T00035]; 3466; 3471; 3.970052; CAAGGC; 1.89453; 1.24322;  
Sequence; AP-2alphaA [T00035]; 3569; 3574; 0.226186; CCAGGC; 1.89453; 0.88633;  
Sequence; AP-2alphaA [T00035]; 3588; 3593; 0.678558; TCAGGC; 0.94727; 0.61056;  
Sequence; AP-2alphaA [T00035]; 3779; 3784; 3.970052; GCCTTG; 1.89453; 1.24322;  
Sequence; GR-beta [T01920]; 59; 63; 4.201913; TTATT; 15.15625; 24.08339;  
Sequence; GR-beta [T01920]; 74; 78; 4.201913; CGATT; 15.15625; 24.08339;  
Sequence; GR-beta [T01920]; 206; 210; 0.840383; AATGG; 15.15625; 23.42307;  
Sequence; GR-beta [T01920]; 287; 291; 4.201913; AATAA; 15.15625; 24.08339;  
Sequence; GR-beta [T01920]; 342; 346; 4.201913; AATAG; 15.15625; 24.08339;  
Sequence; GR-beta [T01920]; 356; 360; 1.680765; AATGC; 7.57812; 9.78592;  
Sequence; GR-beta [T01920]; 374; 378; 0.000000; AATGT; 7.57812; 13.61199;  
Sequence; GR-beta [T01920]; 380; 384; 4.201913; TTATT; 15.15625; 24.08339;  
Sequence; GR-beta [T01920]; 458; 462; 0.840383; CCATT; 15.15625; 23.42307;  
Sequence; GR-beta [T01920]; 467; 471; 3.361531; AATCT; 7.57812; 13.61199;  
Sequence; GR-beta [T01920]; 510; 514; 4.201913; TGATT; 15.15625; 24.08339;  
Sequence; GR-beta [T01920]; 562; 566; 0.000000; AAATT; 7.57812; 13.61199;  
Sequence; GR-beta [T01920]; 563; 567; 1.680765; AATTC; 7.57812; 9.78592;  
Sequence; GR-beta [T01920]; 594; 598; 0.000000; AATGT; 7.57812; 13.61199;  
Sequence; GR-beta [T01920]; 606; 610; 4.201913; CTATT; 15.15625; 24.08339;  
Sequence; GR-beta [T01920]; 610; 614; 4.201913; TGATT; 15.15625; 24.08339;  
Sequence; GR-beta [T01920]; 639; 643; 4.201913; TTATT; 15.15625; 24.08339;  
Sequence; GR-beta [T01920]; 683; 687; 0.840383; AATGG; 15.15625; 23.42307;  
Sequence; GR-beta [T01920]; 725; 729; 0.000000; AATGT; 7.57812; 13.61199;  
Sequence; GR-beta [T01920]; 802; 806; 0.840383; AATGA; 15.15625; 23.42307;  
Sequence; GR-beta [T01920]; 882; 886; 0.840383; AATGA; 15.15625; 23.42307;  
Sequence; GR-beta [T01920]; 887; 891; 4.201913; CTATT; 15.15625; 24.08339;  
Sequence; GR-beta [T01920]; 905; 909; 1.680765; AATGC; 7.57812; 9.78592;  
Sequence; GR-beta [T01920]; 937; 941; 3.361531; AATCT; 7.57812; 13.61199;  
Sequence; GR-beta [T01920]; 950; 954; 1.680765; GAATT; 7.57812; 9.78592;  
Sequence; GR-beta [T01920]; 951; 955; 1.680765; AATTC; 7.57812; 9.78592;  
Sequence; GR-beta [T01920]; 981; 985; 0.840383; TAATT; 15.15625; 23.42307;  
Sequence; GR-beta [T01920]; 982; 986; 0.840383; AATTA; 15.15625; 23.42307;  
Sequence; GR-beta [T01920]; 990; 994; 0.000000; AAATT; 7.57812; 13.61199;  
Sequence; GR-beta [T01920]; 991; 995; 0.840383; AATTG; 15.15625; 23.42307;  
Sequence; GR-beta [T01920]; 1014; 1018; 0.000000; AATGT; 7.57812; 13.61199;  
Sequence; GR-beta [T01920]; 1045; 1049; 0.000000; AATGT; 7.57812; 13.61199;  
Sequence; GR-beta [T01920]; 1081; 1085; 0.840383; AATGA; 15.15625; 23.42307;

Sequence; GR-beta [T01920]; 1083; 1087; 4.201913; TGATT; 15.15625; 24.08339;  
Sequence; GR-beta [T01920]; 1178; 1182; 4.201913; TGATT; 15.15625; 24.08339;  
Sequence; GR-beta [T01920]; 1184; 1188; 1.680765; GAATT; 7.57812; 9.78592;  
Sequence; GR-beta [T01920]; 1185; 1189; 0.840383; AATTG; 15.15625; 23.42307;  
Sequence; GR-beta [T01920]; 1221; 1225; 4.201913; AATAG; 15.15625; 24.08339;  
Sequence; GR-beta [T01920]; 1260; 1264; 4.201913; AATAA; 15.15625; 24.08339;  
Sequence; GR-beta [T01920]; 1268; 1272; 0.840383; TCATT; 15.15625; 23.42307;  
Sequence; GR-beta [T01920]; 1290; 1294; 4.201913; AATAA; 15.15625; 24.08339;  
Sequence; GR-beta [T01920]; 1296; 1300; 0.840383; TAATT; 15.15625; 23.42307;  
Sequence; GR-beta [T01920]; 1297; 1301; 0.000000; AATTT; 7.57812; 13.61199;  
Sequence; GR-beta [T01920]; 1363; 1367; 1.680765; GAATT; 7.57812; 9.78592;  
Sequence; GR-beta [T01920]; 1364; 1368; 1.680765; AATTC; 7.57812; 9.78592;  
Sequence; GR-beta [T01920]; 1376; 1380; 4.201913; CTATT; 15.15625; 24.08339;  
Sequence; GR-beta [T01920]; 1385; 1389; 4.201913; AATAG; 15.15625; 24.08339;  
Sequence; GR-beta [T01920]; 1399; 1403; 0.840383; CCATT; 15.15625; 23.42307;  
Sequence; GR-beta [T01920]; 1407; 1411; 3.361531; ATATT; 7.57812; 13.61199;  
Sequence; GR-beta [T01920]; 1549; 1553; 1.680765; AATGC; 7.57812; 9.78592;  
Sequence; GR-beta [T01920]; 1586; 1590; 0.840383; AATGA; 15.15625; 23.42307;  
Sequence; GR-beta [T01920]; 1635; 1639; 0.840383; TAATT; 15.15625; 23.42307;  
Sequence; GR-beta [T01920]; 1636; 1640; 0.840383; AATTG; 15.15625; 23.42307;  
Sequence; GR-beta [T01920]; 1679; 1683; 4.201913; TTATT; 15.15625; 24.08339;  
Sequence; GR-beta [T01920]; 1691; 1695; 1.680765; GAATT; 7.57812; 9.78592;  
Sequence; GR-beta [T01920]; 1692; 1696; 0.840383; AATTG; 15.15625; 23.42307;  
Sequence; GR-beta [T01920]; 1703; 1707; 0.000000; ACATT; 7.57812; 13.61199;  
Sequence; GR-beta [T01920]; 1730; 1734; 0.840383; CCATT; 15.15625; 23.42307;  
Sequence; GR-beta [T01920]; 1750; 1754; 4.201913; AATAG; 15.15625; 24.08339;  
Sequence; GR-beta [T01920]; 1771; 1775; 0.840383; TAATT; 15.15625; 23.42307;  
Sequence; GR-beta [T01920]; 1772; 1776; 0.840383; AATTA; 15.15625; 23.42307;  
Sequence; GR-beta [T01920]; 1779; 1783; 0.840383; TAATT; 15.15625; 23.42307;  
Sequence; GR-beta [T01920]; 1780; 1784; 0.840383; AATTG; 15.15625; 23.42307;  
Sequence; GR-beta [T01920]; 1785; 1789; 0.840383; AATGA; 15.15625; 23.42307;  
Sequence; GR-beta [T01920]; 1787; 1791; 4.201913; TGATT; 15.15625; 24.08339;  
Sequence; GR-beta [T01920]; 1795; 1799; 4.201913; TGATT; 15.15625; 24.08339;  
Sequence; GR-beta [T01920]; 1823; 1827; 0.840383; CCATT; 15.15625; 23.42307;  
Sequence; GR-beta [T01920]; 1858; 1862; 3.361531; ATATT; 7.57812; 13.61199;  
Sequence; GR-beta [T01920]; 1910; 1914; 4.201913; AATCA; 15.15625; 24.08339;  
Sequence; GR-beta [T01920]; 2002; 2006; 3.361531; AATCT; 7.57812; 13.61199;  
Sequence; GR-beta [T01920]; 2046; 2050; 4.201913; AATAA; 15.15625; 24.08339;  
Sequence; GR-beta [T01920]; 2072; 2076; 0.840383; TAATT; 15.15625; 23.42307;  
Sequence; GR-beta [T01920]; 2073; 2077; 0.000000; AATTT; 7.57812; 13.61199;  
Sequence; GR-beta [T01920]; 2088; 2092; 1.680765; AATGC; 7.57812; 9.78592;  
Sequence; GR-beta [T01920]; 2155; 2159; 3.361531; AATCT; 7.57812; 13.61199;  
Sequence; GR-beta [T01920]; 2193; 2197; 3.361531; AATCT; 7.57812; 13.61199;  
Sequence; GR-beta [T01920]; 2197; 2201; 4.201913; TGATT; 15.15625; 24.08339;

Sequence; GR-beta [T01920]; 2209; 2213; 0.840383; AATGA; 15.15625; 23.42307;  
Sequence; GR-beta [T01920]; 2230; 2234; 1.680765; AATGC; 7.57812; 9.78592;  
Sequence; GR-beta [T01920]; 2319; 2323; 0.840383; AATGG; 15.15625; 23.42307;  
Sequence; GR-beta [T01920]; 2330; 2334; 4.201913; AATAG; 15.15625; 24.08339;  
Sequence; GR-beta [T01920]; 2343; 2347; 0.840383; AATGG; 15.15625; 23.42307;  
Sequence; GR-beta [T01920]; 2358; 2362; 0.000000; AAATT; 7.57812; 13.61199;  
Sequence; GR-beta [T01920]; 2359; 2363; 0.000000; AATTT; 7.57812; 13.61199;  
Sequence; GR-beta [T01920]; 2368; 2372; 4.201913; TGATT; 15.15625; 24.08339;  
Sequence; GR-beta [T01920]; 2403; 2407; 0.000000; AATGT; 7.57812; 13.61199;  
Sequence; GR-beta [T01920]; 2463; 2467; 1.680765; GAATT; 7.57812; 9.78592;  
Sequence; GR-beta [T01920]; 2464; 2468; 0.840383; AATTG; 15.15625; 23.42307;  
Sequence; GR-beta [T01920]; 2510; 2514; 0.000000; AATGT; 7.57812; 13.61199;  
Sequence; GR-beta [T01920]; 2570; 2574; 0.000000; AAATT; 7.57812; 13.61199;  
Sequence; GR-beta [T01920]; 2571; 2575; 0.840383; AATTG; 15.15625; 23.42307;  
Sequence; GR-beta [T01920]; 2580; 2584; 4.201913; TTATT; 15.15625; 24.08339;  
Sequence; GR-beta [T01920]; 2603; 2607; 4.201913; AATAG; 15.15625; 24.08339;  
Sequence; GR-beta [T01920]; 2640; 2644; 0.000000; AATGT; 7.57812; 13.61199;  
Sequence; GR-beta [T01920]; 2670; 2674; 4.201913; AATAG; 15.15625; 24.08339;  
Sequence; GR-beta [T01920]; 2678; 2682; 0.840383; CAATT; 15.15625; 23.42307;  
Sequence; GR-beta [T01920]; 2679; 2683; 0.840383; AATTG; 15.15625; 23.42307;  
Sequence; GR-beta [T01920]; 2686; 2690; 3.361531; AGATT; 7.57812; 13.61199;  
Sequence; GR-beta [T01920]; 2695; 2699; 0.000000; AATGT; 7.57812; 13.61199;  
Sequence; GR-beta [T01920]; 2707; 2711; 0.840383; AATGA; 15.15625; 23.42307;  
Sequence; GR-beta [T01920]; 2727; 2731; 0.000000; ACATT; 7.57812; 13.61199;  
Sequence; GR-beta [T01920]; 2741; 2745; 4.201913; TGATT; 15.15625; 24.08339;  
Sequence; GR-beta [T01920]; 2806; 2810; 0.000000; AATGT; 7.57812; 13.61199;  
Sequence; GR-beta [T01920]; 2828; 2832; 0.000000; AAATT; 7.57812; 13.61199;  
Sequence; GR-beta [T01920]; 2829; 2833; 1.680765; AATTC; 7.57812; 9.78592;  
Sequence; GR-beta [T01920]; 2836; 2840; 0.840383; AATGA; 15.15625; 23.42307;  
Sequence; GR-beta [T01920]; 2926; 2930; 3.361531; AGATT; 7.57812; 13.61199;  
Sequence; GR-beta [T01920]; 2963; 2967; 3.361531; AGATT; 7.57812; 13.61199;  
Sequence; GR-beta [T01920]; 2988; 2992; 4.201913; AATCA; 15.15625; 24.08339;  
Sequence; GR-beta [T01920]; 3006; 3010; 0.000000; ACATT; 7.57812; 13.61199;  
Sequence; GR-beta [T01920]; 3015; 3019; 4.201913; TTATT; 15.15625; 24.08339;  
Sequence; GR-beta [T01920]; 3037; 3041; 4.201913; AATAA; 15.15625; 24.08339;  
Sequence; GR-beta [T01920]; 3053; 3057; 0.840383; AATGG; 15.15625; 23.42307;  
Sequence; GR-beta [T01920]; 3072; 3076; 3.361531; AATAT; 7.57812; 13.61199;  
Sequence; GR-beta [T01920]; 3073; 3077; 3.361531; ATATT; 7.57812; 13.61199;  
Sequence; GR-beta [T01920]; 3082; 3086; 4.201913; TGATT; 15.15625; 24.08339;  
Sequence; GR-beta [T01920]; 3091; 3095; 4.201913; AATAG; 15.15625; 24.08339;  
Sequence; GR-beta [T01920]; 3127; 3131; 3.361531; AATAT; 7.57812; 13.61199;  
Sequence; GR-beta [T01920]; 3128; 3132; 3.361531; ATATT; 7.57812; 13.61199;  
Sequence; GR-beta [T01920]; 3137; 3141; 0.840383; TCATT; 15.15625; 23.42307;  
Sequence; GR-beta [T01920]; 3157; 3161; 4.201913; AATAA; 15.15625; 24.08339;

Sequence; GR-beta [T01920]; 3187; 3191; 3.361531; AATCT; 7.57812; 13.61199;  
Sequence; GR-beta [T01920]; 3214; 3218; 1.680765; GAATT; 7.57812; 9.78592;  
Sequence; GR-beta [T01920]; 3215; 3219; 0.000000; AATTT; 7.57812; 13.61199;  
Sequence; GR-beta [T01920]; 3305; 3309; 3.361531; AGATT; 7.57812; 13.61199;  
Sequence; GR-beta [T01920]; 3325; 3329; 0.840383; AATGA; 15.15625; 23.42307;  
Sequence; GR-beta [T01920]; 3358; 3362; 0.000000; ACATT; 7.57812; 13.61199;  
Sequence; GR-beta [T01920]; 3390; 3394; 0.000000; ACATT; 7.57812; 13.61199;  
Sequence; GR-beta [T01920]; 3393; 3397; 4.201913; TTATT; 15.15625; 24.08339;  
Sequence; GR-beta [T01920]; 3405; 3409; 3.361531; AATCT; 7.57812; 13.61199;  
Sequence; GR-beta [T01920]; 3499; 3503; 3.361531; AGATT; 7.57812; 13.61199;  
Sequence; GR-beta [T01920]; 3528; 3532; 4.201913; TGATT; 15.15625; 24.08339;  
Sequence; GR-beta [T01920]; 3640; 3644; 0.840383; CAATT; 15.15625; 23.42307;  
Sequence; GR-beta [T01920]; 3641; 3645; 0.840383; AATTG; 15.15625; 23.42307;  
Sequence; GR-beta [T01920]; 3647; 3651; 4.201913; TGATT; 15.15625; 24.08339;  
Sequence; GR-beta [T01920]; 3730; 3734; 0.840383; CCATT; 15.15625; 23.42307;  
Sequence; GR-beta [T01920]; 3738; 3742; 3.361531; ATATT; 7.57812; 13.61199;  
Sequence; GR-beta [T01920]; 3770; 3774; 0.840383; TCATT; 15.15625; 23.42307;  
Sequence; GR-beta [T01920]; 3824; 3828; 0.840383; CAATT; 15.15625; 23.42307;  
Sequence; GR-beta [T01920]; 3825; 3829; 0.000000; AATTT; 7.57812; 13.61199;  
Sequence; GR-beta [T01920]; 3856; 3860; 4.201913; AATAA; 15.15625; 24.08339;  
Sequence; GR-beta [T01920]; 3859; 3863; 4.201913; AATAA; 15.15625; 24.08339;  
Sequence; GR-beta [T01920]; 3864; 3868; 0.840383; AATGA; 15.15625; 23.42307;  
Sequence; GR-beta [T01920]; 3866; 3870; 4.201913; TGATT; 15.15625; 24.08339;  
Sequence; GR-beta [T01920]; 3870; 3874; 4.201913; TGATT; 15.15625; 24.08339;  
Sequence; ENKTF-1 [T00255]; 208; 215; 1.255756; TGGCGATG; 0.47363; 0.23158;  
Sequence; c-Ets-1 [T00112]; 235; 241; 0.384261; CTTCCCTA; 0.47363; 0.49757;  
Sequence; c-Ets-1 [T00112]; 491; 497; 4.782565; GTGGAAG; 0.71045; 0.67381;  
Sequence; c-Ets-1 [T00112]; 679; 685; 4.411026; AAGGAAT; 1.65771; 1.74134;  
Sequence; c-Ets-1 [T00112]; 910; 916; 1.513038; TTTCCCTC; 0.71045; 0.88574;  
Sequence; c-Ets-1 [T00112]; 1060; 1066; 4.910652; CTTCCAT; 0.71045; 0.67381;  
Sequence; c-Ets-1 [T00112]; 1070; 1076; 3.590463; GTTCCCTC; 1.18408; 0.98625;  
Sequence; c-Ets-1 [T00112]; 1304; 1310; 1.641124; TTTCCCTT; 0.71045; 0.88574;  
Sequence; c-Ets-1 [T00112]; 1318; 1324; 4.154851; ATTCCTG; 0.47363; 0.49683;  
Sequence; c-Ets-1 [T00112]; 1448; 1454; 3.590463; GTTCCCTC; 1.18408; 0.98625;  
Sequence; c-Ets-1 [T00112]; 1592; 1598; 1.513038; GAGGAAA; 0.71045; 0.88574;  
Sequence; c-Ets-1 [T00112]; 1688; 1694; 4.411026; AAGGAAT; 1.65771; 1.74134;  
Sequence; c-Ets-1 [T00112]; 1867; 1873; 3.718550; GTTCCCTT; 1.18408; 0.98625;  
Sequence; c-Ets-1 [T00112]; 1998; 2004; 4.282938; GAGGAAT; 1.65771; 1.74134;  
Sequence; c-Ets-1 [T00112]; 2108; 2114; 1.769212; TAGGAAA; 0.23682; 0.34753;  
Sequence; c-Ets-1 [T00112]; 2263; 2269; 0.128087; CTTCCCTC; 0.47363; 0.35667;  
Sequence; c-Ets-1 [T00112]; 2550; 2556; 4.654478; CTTCCAG; 1.65771; 1.74134;  
Sequence; c-Ets-1 [T00112]; 2605; 2611; 0.384261; TAGGAAG; 0.47363; 0.49757;  
Sequence; c-Ets-1 [T00112]; 2630; 2636; 1.769212; TTTCCCTA; 0.23682; 0.34753;  
Sequence; c-Ets-1 [T00112]; 2749; 2755; 1.384951; CAGGAAA; 0.71045; 0.88574;

Sequence; c-Ets-1 [T00112]; 2921; 2927; 0.128087; GAGGAAG; 0.47363; 0.35667;  
Sequence; c-Ets-1 [T00112]; 2939; 2945; 3.718550; AAGGAAC; 1.18408; 0.98625;  
Sequence; c-Ets-1 [T00112]; 3183; 3189; 4.154851; CAGGAAT; 0.47363; 0.49683;  
Sequence; c-Ets-1 [T00112]; 3381; 3387; 0.000000; CTTCTG; 0.47363; 0.35667;  
Sequence; c-Ets-1 [T00112]; 3680; 3686; 3.590463; GTTCTC; 1.18408; 0.98625;  
Sequence; Elk-1 [T00250]; 235; 243; 3.944668; CTTCTATG; 0.17761; 0.19440;  
Sequence; Elk-1 [T00250]; 2263; 2271; 0.134348; CTTCTCCT; 0.11841; 0.07384;  
Sequence; Elk-1 [T00250]; 2603; 2611; 3.944668; AATAGGAAG; 0.17761; 0.19440;  
Sequence; Elk-1 [T00250]; 2919; 2927; 2.299314; AAGAGGAAG; 0.17761; 0.14320;  
Sequence; Elk-1 [T00250]; 3381; 3389; 0.134348; CTTCTGCA; 0.11841; 0.07384;  
Sequence; HNF-1C [T01951]; 284; 292; 2.372238; ATAAATAAC; 0.08881; 0.18270;  
Sequence; HNF-1C [T01951]; 3073; 3081; 1.940349; ATATTTAAC; 0.04440; 0.09729;  
Sequence; HNF-1C [T01951]; 3123; 3131; 1.940349; GTTAAATAT; 0.04440; 0.09729;  
Sequence; HNF-1B [T01950]; 285; 293; 3.426751; TAAATAACT; 0.08881; 0.18219;  
Sequence; HNF-1B [T01950]; 3074; 3082; 3.302045; TATTTAACT; 0.08881; 0.18219;  
Sequence; HNF-3alpha [T02512]; 60; 67; 3.500065; TATTTTCT; 0.53284; 1.50190;  
Sequence; HNF-3alpha [T02512]; 338; 345; 3.500065; AGAAAATA; 0.53284; 1.50190;  
Sequence; HNF-3alpha [T02512]; 640; 647; 3.500065; TATTTTTT; 0.53284; 1.50190;  
Sequence; HNF-3alpha [T02512]; 888; 895; 0.000000; TATTTTTA; 0.17761; 0.50176;  
Sequence; HNF-3alpha [T02512]; 1286; 1293; 1.342935; TAAAATA; 0.05920; 0.19583;  
Sequence; HNF-3alpha [T02512]; 1859; 1866; 3.500065; TATTTTTT; 0.53284; 1.50190;  
Sequence; HNF-3alpha [T02512]; 1938; 1945; 0.000000; TGAAAATA; 0.17761; 0.50176;  
Sequence; HNF-3alpha [T02512]; 2527; 2534; 3.500065; TATTTTCT; 0.53284; 1.50190;  
Sequence; HNF-3alpha [T02512]; 2567; 2574; 3.500065; TAAAAATT; 0.53284; 1.50190;  
Sequence; HNF-3alpha [T02512]; 2825; 2832; 3.500065; TAAAAATT; 0.53284; 1.50190;  
Sequence; HNF-3alpha [T02512]; 3016; 3023; 3.500065; TATTTTTT; 0.53284; 1.50190;  
Sequence; HNF-3alpha [T02512]; 3068; 3075; 4.842999; TTTAAATA; 0.17761; 0.59253;  
Sequence; HNF-3alpha [T02512]; 3367; 3374; 4.842999; TATTTTAT; 0.17761; 0.59253;  
Sequence; HNF-3alpha [T02512]; 3852; 3859; 0.000000; TGAAAATA; 0.17761; 0.50176;  
Sequence; Pax-5 [T00070]; 188; 194; 4.007279; GGGCTTT; 2.13135; 1.23048;  
Sequence; Pax-5 [T00070]; 218; 224; 4.007279; GGGCCGT; 2.13135; 1.23048;  
Sequence; Pax-5 [T00070]; 304; 310; 4.007279; GGGCCCT; 2.13135; 1.23048;  
Sequence; Pax-5 [T00070]; 356; 362; 4.007279; AATGCC; 2.13135; 1.23048;  
Sequence; Pax-5 [T00070]; 600; 606; 4.007279; AGGGCCC; 2.13135; 1.23048;  
Sequence; Pax-5 [T00070]; 601; 607; 4.007279; GGGCCCT; 2.13135; 1.23048;  
Sequence; Pax-5 [T00070]; 1667; 1673; 0.000000; GGCCATG; 2.13135; 0.87642;  
Sequence; Pax-5 [T00070]; 2276; 2282; 1.537547; GGCCAG; 1.42090; 0.58583;  
Sequence; Pax-5 [T00070]; 2295; 2301; 4.007279; AAAGCCC; 2.13135; 1.23048;  
Sequence; Pax-5 [T00070]; 3411; 3417; 0.000000; CCTGCC; 2.13135; 0.87642;  
Sequence; Pax-5 [T00070]; 3437; 3443; 0.000000; GGCTTG; 2.13135; 0.87642;  
Sequence; Pax-5 [T00070]; 3570; 3576; 0.000000; CAGGCC; 2.13135; 0.87642;  
Sequence; Pax-5 [T00070]; 3777; 3783; 4.007279; GGCCCT; 2.13135; 1.23048;  
Sequence; p53 [T00671]; 356; 362; 3.516613; AATGCC; 1.42090; 0.75237;  
Sequence; p53 [T00671]; 1483; 1489; 2.813291; GATGCC; 0.94727; 0.47604;

Sequence; p53 [T00671]; 1497; 1503; 1.758307; TATGCCC; 0.71045; 0.48376;  
Sequence; p53 [T00671]; 1519; 1525; 2.813291; GATGCCC; 0.94727; 0.47604;  
Sequence; p53 [T00671]; 1531; 1537; 1.758307; TCTGCCC; 0.71045; 0.48376;  
Sequence; p53 [T00671]; 1667; 1673; 0.000000; GGGCATG; 0.71045; 0.35039;  
Sequence; p53 [T00671]; 2276; 2282; 4.336960; GGGCCAG; 0.47363; 0.15890;  
Sequence; p53 [T00671]; 2642; 2648; 3.028543; TGTGCCC; 0.94727; 0.47604;  
Sequence; p53 [T00671]; 3411; 3417; 0.000000; CCTGCCC; 0.71045; 0.35039;  
Sequence; p53 [T00671]; 3437; 3443; 3.750231; GGGCTTG; 1.42090; 0.62343;  
Sequence; p53 [T00671]; 3570; 3576; 4.125254; CAGGCC; 1.42090; 0.62343;  
Sequence; ER-alpha [T00261]; 368; 372; 0.000000; TGACC; 3.78906; 2.94078;  
Sequence; ER-alpha [T00261]; 1540; 1544; 0.000000; GGTC; 3.78906; 2.94078;  
Sequence; ER-alpha [T00261]; 1928; 1932; 0.000000; TGACC; 3.78906; 2.94078;  
Sequence; ER-alpha [T00261]; 3604; 3608; 0.000000; TGACC; 3.78906; 2.94078;  
Sequence; ER-alpha [T00261]; 3624; 3628; 0.000000; TGACC; 3.78906; 2.94078;  
Sequence; NF-Y [T00150]; 382; 389; 3.353763; ATTGGGCT; 0.94727; 0.92773;  
Sequence; NF-Y [T00150]; 992; 999; 2.194008; ATTGGTGT; 0.41443; 0.48233;  
Sequence; NF-Y [T00150]; 1581; 1588; 4.867193; GCTCCAAT; 0.47363; 0.52183;  
Sequence; NF-Y [T00150]; 2041; 2048; 0.378358; TAACCAAT; 0.17761; 0.23536;  
Sequence; NF-Y [T00150]; 2598; 2605; 2.355069; CAGCCAAT; 0.41443; 0.43379;  
Sequence; NF-Y [T00150]; 2831; 2838; 4.186615; TTCCAAT; 0.35522; 0.42895;  
Sequence; NF-Y [T00150]; 3008; 3015; 1.058936; ATTGGTTT; 0.23682; 0.29997;  
Sequence; NF-Y [T00150]; 3147; 3154; 4.186615; TTTCCAAT; 0.35522; 0.42895;  
Sequence; NF-Y [T00150]; 3152; 3159; 3.732121; AATCCAAT; 0.94727; 0.92773;  
Sequence; NF-Y [T00150]; 3320; 3327; 2.128210; GAGCCAAT; 0.41443; 0.48233;  
Sequence; NF-Y [T00150]; 3636; 3643; 2.582704; TTCCAAT; 0.41443; 0.43379;  
Sequence; HIF-1 [T01609]; 407; 415; 1.005355; CGCGCACGT; 0.19241; 0.10912;  
Sequence; YY1 [T00915]; 207; 210; 0.000000; ATGG; 15.15625; 14.24212;  
Sequence; YY1 [T00915]; 213; 216; 0.000000; ATGG; 15.15625; 14.24212;  
Sequence; YY1 [T00915]; 302; 305; 0.000000; ATGG; 15.15625; 14.24212;  
Sequence; YY1 [T00915]; 458; 461; 0.000000; CCAT; 15.15625; 14.24212;  
Sequence; YY1 [T00915]; 540; 543; 0.000000; ATGG; 15.15625; 14.24212;  
Sequence; YY1 [T00915]; 684; 687; 0.000000; ATGG; 15.15625; 14.24212;  
Sequence; YY1 [T00915]; 696; 699; 0.000000; CCAT; 15.15625; 14.24212;  
Sequence; YY1 [T00915]; 745; 748; 0.000000; ATGG; 15.15625; 14.24212;  
Sequence; YY1 [T00915]; 787; 790; 0.000000; CCAT; 15.15625; 14.24212;  
Sequence; YY1 [T00915]; 814; 817; 0.000000; ATGG; 15.15625; 14.24212;  
Sequence; YY1 [T00915]; 1063; 1066; 0.000000; CCAT; 15.15625; 14.24212;  
Sequence; YY1 [T00915]; 1151; 1154; 0.000000; CCAT; 15.15625; 14.24212;  
Sequence; YY1 [T00915]; 1241; 1244; 0.000000; ATGG; 15.15625; 14.24212;  
Sequence; YY1 [T00915]; 1273; 1276; 0.000000; CCAT; 15.15625; 14.24212;  
Sequence; YY1 [T00915]; 1370; 1373; 0.000000; ATGG; 15.15625; 14.24212;  
Sequence; YY1 [T00915]; 1399; 1402; 0.000000; CCAT; 15.15625; 14.24212;  
Sequence; YY1 [T00915]; 1433; 1436; 0.000000; CCAT; 15.15625; 14.24212;  
Sequence; YY1 [T00915]; 1684; 1687; 0.000000; CCAT; 15.15625; 14.24212;

Sequence; YY1 [T00915]; 1730; 1733; 0.000000; CCAT; 15.15625; 14.24212;  
Sequence; YY1 [T00915]; 1823; 1826; 0.000000; CCAT; 15.15625; 14.24212;  
Sequence; YY1 [T00915]; 1990; 1993; 0.000000; CCAT; 15.15625; 14.24212;  
Sequence; YY1 [T00915]; 2151; 2154; 0.000000; ATGG; 15.15625; 14.24212;  
Sequence; YY1 [T00915]; 2213; 2216; 0.000000; ATGG; 15.15625; 14.24212;  
Sequence; YY1 [T00915]; 2320; 2323; 0.000000; ATGG; 15.15625; 14.24212;  
Sequence; YY1 [T00915]; 2338; 2341; 0.000000; CCAT; 15.15625; 14.24212;  
Sequence; YY1 [T00915]; 2344; 2347; 0.000000; ATGG; 15.15625; 14.24212;  
Sequence; YY1 [T00915]; 3054; 3057; 0.000000; ATGG; 15.15625; 14.24212;  
Sequence; YY1 [T00915]; 3471; 3474; 0.000000; CCAT; 15.15625; 14.24212;  
Sequence; YY1 [T00915]; 3534; 3537; 0.000000; ATGG; 15.15625; 14.24212;  
Sequence; YY1 [T00915]; 3659; 3662; 0.000000; CCAT; 15.15625; 14.24212;  
Sequence; YY1 [T00915]; 3730; 3733; 0.000000; CCAT; 15.15625; 14.24212;  
Sequence; YY1 [T00915]; 3757; 3760; 0.000000; CCAT; 15.15625; 14.24212;  
Sequence; PXR-1:RXR-alpha [T05671]; 523; 530; 1.759733; TGA ACTCT; 0.11841; 0.14348;  
Sequence; PXR-1:RXR-alpha [T05671]; 819; 826; 1.636150; TGA ACTTT; 0.11841; 0.20017;  
Sequence; PXR-1:RXR-alpha [T05671]; 1641; 1648; 0.123583; TGA ACTCA; 0.23682; 0.34365;  
Sequence; PXR-1:RXR-alpha [T05671]; 2892; 2899; 3.395883; TGA ACCCA; 0.23682; 0.25666;  
Sequence; PXR-1:RXR-alpha [T05671]; 3651; 3658; 2.454225; TGA ACTTC; 0.23682; 0.24633;  
Sequence; FOXP3 [T04280]; 115; 120; 1.824994; GTTGTA; 0.94727; 1.26272;  
Sequence; FOXP3 [T04280]; 348; 353; 4.756447; GTTTC; 5.68359; 7.70063;  
Sequence; FOXP3 [T04280]; 366; 371; 4.756447; GTTGAC; 5.68359; 7.70063;  
Sequence; FOXP3 [T04280]; 435; 440; 0.000000; GTTGTT; 2.84180; 3.30187;  
Sequence; FOXP3 [T04280]; 482; 487; 4.756447; GTTGAG; 5.68359; 7.70063;  
Sequence; FOXP3 [T04280]; 553; 558; 4.756447; GAAAAC; 5.68359; 7.70063;  
Sequence; FOXP3 [T04280]; 918; 923; 0.000000; GTTGTC; 2.84180; 3.30187;  
Sequence; FOXP3 [T04280]; 1023; 1028; 4.756447; GAAAAC; 5.68359; 7.70063;  
Sequence; FOXP3 [T04280]; 1048; 1053; 4.756447; GTTTTT; 5.68359; 7.70063;  
Sequence; FOXP3 [T04280]; 1247; 1252; 0.000000; GTTGTT; 2.84180; 3.30187;  
Sequence; FOXP3 [T04280]; 1250; 1255; 0.000000; GTTGTT; 2.84180; 3.30187;  
Sequence; FOXP3 [T04280]; 1353; 1358; 0.000000; GTTGTT; 2.84180; 3.30187;  
Sequence; FOXP3 [T04280]; 1356; 1361; 4.756447; GTTTTT; 5.68359; 7.70063;  
Sequence; FOXP3 [T04280]; 1440; 1445; 4.756447; GTTTC; 5.68359; 7.70063;  
Sequence; FOXP3 [T04280]; 1560; 1565; 1.824994; GTTGTA; 0.94727; 1.26272;  
Sequence; FOXP3 [T04280]; 1754; 1759; 4.756447; GTTTTG; 5.68359; 7.70063;  
Sequence; FOXP3 [T04280]; 1854; 1859; 4.756447; GTTGAT; 5.68359; 7.70063;  
Sequence; FOXP3 [T04280]; 2022; 2027; 4.756447; GTTTTT; 5.68359; 7.70063;  
Sequence; FOXP3 [T04280]; 2180; 2185; 4.756447; GTTGAG; 5.68359; 7.70063;  
Sequence; FOXP3 [T04280]; 2222; 2227; 0.000000; AACAAC; 2.84180; 3.30187;  
Sequence; FOXP3 [T04280]; 2752; 2757; 4.756447; GAAAAC; 5.68359; 7.70063;  
Sequence; FOXP3 [T04280]; 3002; 3007; 4.756447; GAAAAC; 5.68359; 7.70063;  
Sequence; FOXP3 [T04280]; 3232; 3237; 0.000000; GACAAC; 2.84180; 3.30187;  
Sequence; FOXP3 [T04280]; 3337; 3342; 4.756447; GTTGAG; 5.68359; 7.70063;  
Sequence; FOXP3 [T04280]; 3422; 3427; 4.756447; GTTTTT; 5.68359; 7.70063;

Sequence; FOXP3 [T04280]; 3444; 3449; 4.756447; GTTTTG; 5.68359; 7.70063;  
Sequence; FOXP3 [T04280]; 3645; 3650; 4.756447; GTTGAT; 5.68359; 7.70063;  
Sequence; FOXP3 [T04280]; 3844; 3849; 0.000000; GTTGTT; 2.84180; 3.30187;  
Sequence; FOXP3 [T04280]; 3847; 3852; 4.756447; GTTGAT; 5.68359; 7.70063;  
Sequence; c-Ets-2 [T00113]; 676; 684; 4.589988; GTGAAGGAA; 0.13321; 0.12628;  
Sequence; c-Ets-2 [T00113]; 911; 919; 2.142327; TTCCTCTGT; 0.32562; 0.33389;  
Sequence; c-Ets-2 [T00113]; 1071; 1079; 1.071163; TTCCTCTTG; 0.11841; 0.14017;  
Sequence; c-Ets-2 [T00113]; 1305; 1313; 4.017001; TTCCTTCC; 0.31082; 0.43923;  
Sequence; c-Ets-2 [T00113]; 1449; 1457; 1.071163; TTCCTCTTG; 0.11841; 0.14017;  
Sequence; c-Ets-2 [T00113]; 1589; 1597; 1.644150; GAGGAGGAA; 0.08881; 0.07338;  
Sequence; c-Ets-2 [T00113]; 1685; 1693; 4.091811; CATAAGGAA; 0.31082; 0.43923;  
Sequence; c-Ets-2 [T00113]; 1868; 1876; 4.091811; TTCCTTACA; 0.31082; 0.43923;  
Sequence; c-Ets-2 [T00113]; 1995; 2003; 2.217136; TCTGAGGAA; 0.32562; 0.33389;  
Sequence; c-Ets-2 [T00113]; 2264; 2272; 1.644150; TTCCTCCTT; 0.08881; 0.07338;  
Sequence; c-Ets-2 [T00113]; 2918; 2926; 1.071163; GAAGAGGAA; 0.11841; 0.14017;  
Sequence; c-Ets-2 [T00113]; 2936; 2944; 3.518824; CAGAAGGAA; 0.35522; 0.31782;  
Sequence; c-Ets-2 [T00113]; 3681; 3689; 2.142327; TTCCTCTGT; 0.32562; 0.33389;  
Sequence; RXR-alpha [T01345]; 691; 697; 4.019014; AAGACCC; 1.89453; 1.32722;  
Sequence; RXR-alpha [T01345]; 873; 879; 4.019014; GGGTCTT; 1.89453; 1.32722;  
Sequence; RXR-alpha [T01345]; 968; 974; 2.544678; GGGTGAA; 1.65771; 1.19897;  
Sequence; RXR-alpha [T01345]; 1131; 1137; 4.019014; GGGTGTG; 1.89453; 1.32722;  
Sequence; RXR-alpha [T01345]; 1428; 1434; 0.000000; TTAACCC; 0.47363; 0.43450;  
Sequence; RXR-alpha [T01345]; 1539; 1545; 1.696452; GGGTCAG; 0.94727; 0.62084;  
Sequence; RXR-alpha [T01345]; 1607; 1613; 4.241130; CTTACCC; 1.89453; 1.32722;  
Sequence; RXR-alpha [T01345]; 1652; 1658; 0.000000; GGGTTAA; 0.47363; 0.43450;  
Sequence; RXR-alpha [T01345]; 2007; 2013; 2.544678; TTCACCC; 1.65771; 1.19897;  
Sequence; RXR-alpha [T01345]; 2398; 2404; 2.544678; GGGTGAA; 1.65771; 1.19897;  
Sequence; RXR-alpha [T01345]; 2425; 2431; 0.000000; TTAACCC; 0.47363; 0.43450;  
Sequence; RXR-alpha [T01345]; 2892; 2898; 0.000000; TGAACCC; 0.47363; 0.43450;  
Sequence; RXR-alpha [T01345]; 3259; 3265; 1.474336; GGGTTTG; 0.94727; 0.62084;  
Sequence; RXR-alpha [T01345]; 3342; 3348; 1.474336; GGGTTTG; 0.94727; 0.62084;  
Sequence; RXR-alpha [T01345]; 3577; 3583; 2.544678; AGAACCC; 1.65771; 1.19897;  
Sequence; TCF-4E [T02878]; 705; 711; 3.151193; TGCAAAG; 0.47363; 0.60937;  
Sequence; TCF-4E [T02878]; 2324; 2330; 3.151193; CTTTGCA; 0.47363; 0.60937;  
Sequence; TCF-4E [T02878]; 2437; 2443; 3.151193; CTTTGAT; 0.47363; 0.60937;  
Sequence; TCF-4E [T02878]; 3546; 3552; 0.000000; CTTTGCT; 0.23682; 0.26301;  
Sequence; STAT4 [T01577]; 417; 422; 2.941176; GGAACC; 5.68359; 5.24489;  
Sequence; STAT4 [T01577]; 493; 498; 2.941176; GGAAGT; 5.68359; 5.24489;  
Sequence; STAT4 [T01577]; 681; 686; 4.411765; GGAATG; 3.78906; 2.93282;  
Sequence; STAT4 [T01577]; 727; 732; 2.941176; TGTTCC; 5.68359; 5.24489;  
Sequence; STAT4 [T01577]; 909; 914; 2.941176; CTTTCC; 5.68359; 5.24489;  
Sequence; STAT4 [T01577]; 949; 954; 1.470588; GGAATT; 3.78906; 4.15366;  
Sequence; STAT4 [T01577]; 1040; 1045; 2.941176; GGAACA; 5.68359; 5.24489;  
Sequence; STAT4 [T01577]; 1069; 1074; 2.941176; TGTTCC; 5.68359; 5.24489;

Sequence; STAT4 [T01577]; 1269; 1274; 4.411765; CATTCC; 3.78906; 2.93282;  
Sequence; STAT4 [T01577]; 1303; 1308; 2.941176; CTTTCC; 5.68359; 5.24489;  
Sequence; STAT4 [T01577]; 1308; 1313; 2.941176; CTTTCC; 5.68359; 5.24489;  
Sequence; STAT4 [T01577]; 1317; 1322; 2.941176; TATTCC; 5.68359; 5.24489;  
Sequence; STAT4 [T01577]; 1447; 1452; 2.941176; GGTTC; 5.68359; 5.24489;  
Sequence; STAT4 [T01577]; 1567; 1572; 2.941176; CTTTCC; 5.68359; 5.24489;  
Sequence; STAT4 [T01577]; 1594; 1599; 1.470588; GGAAAC; 3.78906; 4.15366;  
Sequence; STAT4 [T01577]; 1627; 1632; 2.941176; GGAACC; 5.68359; 5.24489;  
Sequence; STAT4 [T01577]; 1680; 1685; 2.941176; TATTCC; 5.68359; 5.24489;  
Sequence; STAT4 [T01577]; 1690; 1695; 1.470588; GGAATT; 3.78906; 4.15366;  
Sequence; STAT4 [T01577]; 1866; 1871; 2.941176; TGTTC; 5.68359; 5.24489;  
Sequence; STAT4 [T01577]; 2000; 2005; 2.941176; GGAATC; 5.68359; 5.24489;  
Sequence; STAT4 [T01577]; 2110; 2115; 1.470588; GGAAAA; 3.78906; 4.15366;  
Sequence; STAT4 [T01577]; 2153; 2158; 2.941176; GGAATC; 5.68359; 5.24489;  
Sequence; STAT4 [T01577]; 2220; 2225; 2.941176; GGAACA; 5.68359; 5.24489;  
Sequence; STAT4 [T01577]; 2262; 2267; 4.411765; TCTTCC; 3.78906; 2.93282;  
Sequence; STAT4 [T01577]; 2607; 2612; 2.941176; GGAAGT; 5.68359; 5.24489;  
Sequence; STAT4 [T01577]; 2629; 2634; 1.470588; GTTTC; 3.78906; 4.15366;  
Sequence; STAT4 [T01577]; 2751; 2756; 1.470588; GGAAAA; 3.78906; 4.15366;  
Sequence; STAT4 [T01577]; 2829; 2834; 1.470588; AATTCC; 3.78906; 4.15366;  
Sequence; STAT4 [T01577]; 2923; 2928; 4.411765; GGAAGA; 3.78906; 2.93282;  
Sequence; STAT4 [T01577]; 2931; 2936; 2.941176; TGTTC; 5.68359; 5.24489;  
Sequence; STAT4 [T01577]; 2941; 2946; 1.470588; GGAACT; 3.78906; 4.15366;  
Sequence; STAT4 [T01577]; 3020; 3025; 1.470588; TTTTCC; 3.78906; 4.15366;  
Sequence; STAT4 [T01577]; 3146; 3151; 1.470588; TTTTCC; 3.78906; 4.15366;  
Sequence; STAT4 [T01577]; 3185; 3190; 2.941176; GGAATC; 5.68359; 5.24489;  
Sequence; STAT4 [T01577]; 3217; 3222; 1.470588; TTTTCC; 3.78906; 4.15366;  
Sequence; STAT4 [T01577]; 3403; 3408; 2.941176; GGAATC; 5.68359; 5.24489;  
Sequence; STAT4 [T01577]; 3501; 3506; 0.000000; ATTTCC; 0.94727; 1.18333;  
Sequence; STAT4 [T01577]; 3654; 3659; 2.941176; ACTTCC; 5.68359; 5.24489;  
Sequence; STAT4 [T01577]; 3679; 3684; 2.941176; TGTTC; 5.68359; 5.24489;  
Sequence; STAT4 [T01577]; 3704; 3709; 2.941176; TGTTC; 5.68359; 5.24489;  
Sequence; STAT4 [T01577]; 3753; 3758; 2.941176; TGTTC; 5.68359; 5.24489;  
Sequence; STAT4 [T01577]; 3802; 3807; 2.941176; GGTTC; 5.68359; 5.24489;  
Sequence; GR-alpha [T00337]; 238; 242; 0.000000; CCTAT; 15.15625; 14.12687;  
Sequence; GR-alpha [T00337]; 251; 255; 0.207689; CCTTT; 15.15625; 14.12687;  
Sequence; GR-alpha [T00337]; 263; 267; 0.000000; CCTGT; 15.15625; 14.12687;  
Sequence; GR-alpha [T00337]; 316; 320; 0.207689; CCTCT; 15.15625; 14.12687;  
Sequence; GR-alpha [T00337]; 390; 394; 0.000000; CCTGT; 15.15625; 14.12687;  
Sequence; GR-alpha [T00337]; 605; 609; 0.000000; CCTAT; 15.15625; 14.12687;  
Sequence; GR-alpha [T00337]; 762; 766; 0.207689; AGAGG; 15.15625; 14.12687;  
Sequence; GR-alpha [T00337]; 861; 865; 0.207689; AGAGG; 15.15625; 14.12687;  
Sequence; GR-alpha [T00337]; 913; 917; 0.207689; CCTCT; 15.15625; 14.12687;  
Sequence; GR-alpha [T00337]; 976; 980; 0.000000; ACAGG; 15.15625; 14.12687;

Sequence; GR-alpha [T00337]; 1073; 1077; 0.207689; CCTCT; 15.15625; 14.12687;  
Sequence; GR-alpha [T00337]; 1307; 1311; 0.207689; CCTTT; 15.15625; 14.12687;  
Sequence; GR-alpha [T00337]; 1336; 1340; 0.207689; CCTCT; 15.15625; 14.12687;  
Sequence; GR-alpha [T00337]; 1375; 1379; 0.000000; CCTAT; 15.15625; 14.12687;  
Sequence; GR-alpha [T00337]; 1451; 1455; 0.207689; CCTCT; 15.15625; 14.12687;  
Sequence; GR-alpha [T00337]; 1503; 1507; 0.207689; CCTTT; 15.15625; 14.12687;  
Sequence; GR-alpha [T00337]; 1613; 1617; 0.000000; CCTGT; 15.15625; 14.12687;  
Sequence; GR-alpha [T00337]; 1664; 1668; 0.207689; AGAGG; 15.15625; 14.12687;  
Sequence; GR-alpha [T00337]; 1714; 1718; 0.207689; CCTTT; 15.15625; 14.12687;  
Sequence; GR-alpha [T00337]; 1846; 1850; 0.207689; AGAGG; 15.15625; 14.12687;  
Sequence; GR-alpha [T00337]; 2063; 2067; 0.207689; AAAGG; 15.15625; 14.12687;  
Sequence; GR-alpha [T00337]; 2102; 2106; 0.000000; ATAGG; 15.15625; 14.12687;  
Sequence; GR-alpha [T00337]; 2120; 2124; 0.207689; CCTTT; 15.15625; 14.12687;  
Sequence; GR-alpha [T00337]; 2130; 2134; 0.000000; CCTGT; 15.15625; 14.12687;  
Sequence; GR-alpha [T00337]; 2269; 2273; 0.207689; CCTTT; 15.15625; 14.12687;  
Sequence; GR-alpha [T00337]; 2303; 2307; 0.207689; AGAGG; 15.15625; 14.12687;  
Sequence; GR-alpha [T00337]; 2522; 2526; 0.207689; AAAGG; 15.15625; 14.12687;  
Sequence; GR-alpha [T00337]; 2604; 2608; 0.000000; ATAGG; 15.15625; 14.12687;  
Sequence; GR-alpha [T00337]; 2633; 2637; 0.000000; CCTAT; 15.15625; 14.12687;  
Sequence; GR-alpha [T00337]; 2789; 2793; 0.000000; ACAGG; 15.15625; 14.12687;  
Sequence; GR-alpha [T00337]; 2882; 2886; 0.000000; CCTGT; 15.15625; 14.12687;  
Sequence; GR-alpha [T00337]; 2887; 2891; 0.207689; AAAGG; 15.15625; 14.12687;  
Sequence; GR-alpha [T00337]; 2920; 2924; 0.207689; AGAGG; 15.15625; 14.12687;  
Sequence; GR-alpha [T00337]; 2979; 2983; 0.207689; AAAGG; 15.15625; 14.12687;  
Sequence; GR-alpha [T00337]; 3099; 3103; 0.207689; CCTTT; 15.15625; 14.12687;  
Sequence; GR-alpha [T00337]; 3177; 3181; 0.207689; CCTCT; 15.15625; 14.12687;  
Sequence; GR-alpha [T00337]; 3416; 3420; 0.207689; CCTTT; 15.15625; 14.12687;  
Sequence; GR-alpha [T00337]; 3488; 3492; 0.207689; CCTCT; 15.15625; 14.12687;  
Sequence; GR-alpha [T00337]; 3554; 3558; 0.207689; CCTTT; 15.15625; 14.12687;  
Sequence; GR-alpha [T00337]; 3683; 3687; 0.207689; CCTCT; 15.15625; 14.12687;  
Sequence; GR-alpha [T00337]; 3719; 3723; 0.207689; CCTTT; 15.15625; 14.12687;  
Sequence; GR-alpha [T00337]; 3799; 3803; 0.207689; AAAGG; 15.15625; 14.12687;  
Sequence; VDR [T00885]; 653; 661; 4.617121; GTTCAGCCC; 0.72525; 0.70319;  
Sequence; VDR [T00885]; 815; 823; 4.617121; TGGCTGAAC; 0.72525; 0.70319;  
Sequence; VDR [T00885]; 2769; 2777; 3.462841; GTTCACTCC; 0.41443; 0.36827;  
Sequence; VDR [T00885]; 2888; 2896; 3.462841; AAGGTGAAC; 0.41443; 0.36827;  
Sequence; VDR [T00885]; 3647; 3655; 4.617121; TGATTGAAC; 0.72525; 0.70319;  
Sequence; IRF-2 [T01491]; 828; 833; 0.000000; AAGTGA; 0.94727; 1.18333;  
Sequence; IRF-2 [T01491]; 852; 857; 0.000000; AAGTGA; 0.94727; 1.18333;  
Sequence; IRF-2 [T01491]; 2993; 2998; 0.000000; TCACTT; 0.94727; 1.18333;  
Sequence; IRF-2 [T01491]; 3789; 3794; 0.000000; TCACTT; 0.94727; 1.18333;  
Sequence; TCF-4 [T02918]; 876; 885; 2.322783; TCTTTGAATG; 0.06660; 0.11214;  
Sequence; TCF-4 [T02918]; 2058; 2067; 4.639022; GGCTCAAAGG; 0.08141; 0.07562;  
Sequence; TCF-4 [T02918]; 2436; 2445; 2.859093; TCTTTGATCT; 0.06660; 0.11880;

Sequence; TFII-I [T00824]; 681; 686; 4.756447; GGAATG; 5.68359; 5.59373;  
Sequence; TFII-I [T00824]; 909; 914; 0.000000; CTTTCC; 2.84180; 2.32052;  
Sequence; TFII-I [T00824]; 940; 945; 0.000000; CTATCC; 2.84180; 2.32052;  
Sequence; TFII-I [T00824]; 1269; 1274; 4.756447; CATTCC; 5.68359; 5.59373;  
Sequence; TFII-I [T00824]; 1303; 1308; 0.000000; CTTTCC; 2.84180; 2.32052;  
Sequence; TFII-I [T00824]; 1308; 1313; 0.000000; CTTTCC; 2.84180; 2.32052;  
Sequence; TFII-I [T00824]; 1567; 1572; 0.000000; CTTTCC; 2.84180; 2.32052;  
Sequence; TFII-I [T00824]; 2236; 2241; 4.756447; GGATAT; 5.68359; 5.59373;  
Sequence; TFII-I [T00824]; 2865; 2870; 0.000000; CTGTCC; 2.84180; 2.32052;  
Sequence; TFII-I [T00824]; 2903; 2908; 4.756447; GGACTG; 5.68359; 5.59373;  
Sequence; TFII-I [T00824]; 3151; 3156; 4.756447; CAATCC; 5.68359; 5.59373;  
Sequence; TFII-I [T00824]; 3200; 3205; 4.756447; GGACAT; 5.68359; 5.59373;  
Sequence; TFII-I [T00824]; 3501; 3506; 4.756447; ATTTCC; 5.68359; 5.59373;  
Sequence; TFII-I [T00824]; 3516; 3521; 4.756447; GGATTG; 5.68359; 5.59373;  
Sequence; TFII-I [T00824]; 3813; 3818; 4.756447; GGACTG; 5.68359; 5.59373;  
Sequence; GATA-1 [T00306]; 143; 148; 1.896347; CGGATA; 7.57812; 8.18225;  
Sequence; GATA-1 [T00306]; 281; 286; 2.176375; AGGATA; 7.57812; 8.18225;  
Sequence; GATA-1 [T00306]; 775; 780; 0.280028; TAGATA; 1.89453; 3.33839;  
Sequence; GATA-1 [T00306]; 941; 946; 2.176375; TATCCT; 7.57812; 8.18225;  
Sequence; GATA-1 [T00306]; 985; 990; 2.176375; TATCCA; 7.57812; 8.18225;  
Sequence; GATA-1 [T00306]; 1156; 1161; 2.176375; TATCGA; 7.57812; 8.18225;  
Sequence; GATA-1 [T00306]; 1187; 1192; 1.038567; TTGATA; 3.78906; 5.68336;  
Sequence; GATA-1 [T00306]; 1340; 1345; 0.280028; TATCTT; 1.89453; 3.33839;  
Sequence; GATA-1 [T00306]; 1380; 1385; 0.280028; TATCTA; 1.89453; 3.33839;  
Sequence; GATA-1 [T00306]; 1387; 1392; 0.280028; TAGATA; 1.89453; 3.33839;  
Sequence; GATA-1 [T00306]; 1404; 1409; 1.038567; TTGATA; 3.78906; 5.68336;  
Sequence; GATA-1 [T00306]; 1477; 1482; 0.280028; TAGATA; 1.89453; 3.33839;  
Sequence; GATA-1 [T00306]; 1491; 1496; 0.758539; CTGATA; 3.78906; 5.68336;  
Sequence; GATA-1 [T00306]; 1513; 1518; 0.000000; CAGATA; 1.89453; 2.39300;  
Sequence; GATA-1 [T00306]; 1767; 1772; 2.001358; GGGATA; 7.57812; 8.18225;  
Sequence; GATA-1 [T00306]; 1855; 1860; 1.038567; TTGATA; 3.78906; 5.68336;  
Sequence; GATA-1 [T00306]; 2235; 2240; 2.001358; GGGATA; 7.57812; 8.18225;  
Sequence; GATA-1 [T00306]; 2380; 2385; 0.863549; GTGATA; 3.78906; 5.68336;  
Sequence; GATA-1 [T00306]; 2672; 2677; 0.280028; TAGATA; 1.89453; 3.33839;  
Sequence; GATA-1 [T00306]; 2956; 2961; 1.038567; ATGATA; 3.78906; 5.68336;  
Sequence; GATA-1 [T00306]; 3062; 3067; 0.000000; TATCTG; 1.89453; 2.39300;  
Sequence; GATA-1 [T00306]; 3354; 3359; 0.863549; TATCAC; 3.78906; 5.68336;  
Sequence; GATA-1 [T00306]; 3372; 3377; 0.863549; TATCAC; 3.78906; 5.68336;  
Sequence; GATA-1 [T00306]; 3398; 3403; 0.000000; TATCTG; 1.89453; 2.39300;  
Sequence; GATA-1 [T00306]; 3428; 3433; 0.280028; TAGATA; 1.89453; 3.33839;  
Sequence; c-Jun [T00133]; 999; 1005; 4.883696; TATGTCA; 0.47363; 0.58998;  
Sequence; c-Jun [T00133]; 2143; 2149; 2.538231; TGACTTA; 0.94727; 0.95495;  
Sequence; c-Jun [T00133]; 2516; 2522; 4.441904; TGACTGA; 0.23682; 0.24633;  
Sequence; c-Jun [T00133]; 2699; 2705; 4.883696; TGACATA; 0.47363; 0.58998;

Sequence; TFIID [T00820]; 37; 43; 1.537547; TTTTGTA; 1.42090; 2.75521;  
Sequence; TFIID [T00820]; 349; 355; 0.000000; TTTTCGA; 2.13135; 5.21175;  
Sequence; TFIID [T00820]; 514; 520; 4.007279; TTTACGA; 2.13135; 4.96187;  
Sequence; TFIID [T00820]; 643; 649; 1.537547; TTTTCA; 1.42090; 2.75521;  
Sequence; TFIID [T00820]; 1009; 1015; 4.007279; TTGTA AAA; 2.13135; 4.96187;  
Sequence; TFIID [T00820]; 1211; 1217; 1.537547; TACAAAA; 1.42090; 2.75521;  
Sequence; TFIID [T00820]; 1254; 1260; 4.007279; TTTATGA; 2.13135; 4.96187;  
Sequence; TFIID [T00820]; 1358; 1364; 0.000000; TTTTCGA; 2.13135; 5.21175;  
Sequence; TFIID [T00820]; 1791; 1797; 0.000000; TTTTTGA; 2.13135; 5.21175;  
Sequence; TFIID [T00820]; 1826; 1832; 0.000000; TTGAAAA; 2.13135; 5.21175;  
Sequence; TFIID [T00820]; 2354; 2360; 0.000000; TATAAAA; 2.13135; 5.21175;  
Sequence; TFIID [T00820]; 2565; 2571; 0.000000; TCTAAAA; 2.13135; 5.21175;  
Sequence; TFIID [T00820]; 2635; 2641; 0.000000; TATAAAA; 2.13135; 5.21175;  
Sequence; TFIID [T00820]; 2689; 2695; 4.007279; TTGTA AAA; 2.13135; 4.96187;  
Sequence; TFIID [T00820]; 2690; 2696; 1.537547; TGTAAAA; 1.42090; 2.75521;  
Sequence; TFIID [T00820]; 2744; 2750; 3.075094; TTTTGCA; 0.23682; 0.36096;  
Sequence; TFIID [T00820]; 3000; 3006; 0.000000; TTGAAAA; 2.13135; 5.21175;  
Sequence; TFIID [T00820]; 3020; 3026; 1.537547; TTTTCCA; 1.42090; 2.75521;  
Sequence; TFIID [T00820]; 3046; 3052; 0.000000; TATAAAA; 2.13135; 5.21175;  
Sequence; TFIID [T00820]; 3048; 3054; 0.000000; TAAAAAA; 2.13135; 5.21175;  
Sequence; TFIID [T00820]; 3085; 3091; 0.000000; TTTTATA; 2.13135; 5.21175;  
Sequence; TFIID [T00820]; 3086; 3092; 4.007279; TTTATAA; 2.13135; 4.96187;  
Sequence; TFIID [T00820]; 3146; 3152; 1.537547; TTTTCCA; 1.42090; 2.75521;  
Sequence; TFIID [T00820]; 3170; 3176; 0.000000; TTTTTTA; 2.13135; 5.21175;  
Sequence; TFIID [T00820]; 3217; 3223; 1.537547; TTTTCCA; 1.42090; 2.75521;  
Sequence; TFIID [T00820]; 3245; 3251; 0.000000; TTGAAAA; 2.13135; 5.21175;  
Sequence; TFIID [T00820]; 3423; 3429; 0.000000; TTTTTTA; 2.13135; 5.21175;  
Sequence; TFIID [T00820]; 3425; 3431; 0.000000; TTTTAGA; 2.13135; 5.21175;  
Sequence; TFIID [T00820]; 3478; 3484; 4.007279; TTTAAGA; 2.13135; 4.96187;  
Sequence; TFIID [T00820]; 3613; 3619; 4.007279; TCGTA AAA; 2.13135; 4.96187;  
Sequence; TFIID [T00820]; 3793; 3799; 1.537547; TTCAAAA; 1.42090; 2.75521;  
Sequence; TFIID [T00820]; 3794; 3800; 0.000000; TCAAAAA; 2.13135; 5.21175;  
Sequence; TFIID [T00820]; 3858; 3864; 4.007279; TAATAAAA; 2.13135; 4.96187;  
Sequence; PR B [T00696]; 724; 730; 2.809330; TAATGTT; 1.42090; 2.47706;  
Sequence; PR B [T00696]; 1013; 1019; 3.297560; AAATGTT; 0.47363; 0.97208;  
Sequence; PR B [T00696]; 1042; 1048; 2.809330; AACAAATG; 1.42090; 2.47706;  
Sequence; PR B [T00696]; 1044; 1050; 2.809330; CAATGTT; 1.42090; 2.47706;  
Sequence; PR B [T00696]; 2625; 2631; 1.404665; TAGTGTT; 0.71045; 0.90957;  
Sequence; PR B [T00696]; 3005; 3011; 2.809330; AACATTG; 1.42090; 2.47706;  
Sequence; PR B [T00696]; 3119; 3125; 1.404665; TAGTGTT; 0.71045; 0.90957;  
Sequence; PR B [T00696]; 3289; 3295; 1.892895; AAGTGTT; 0.23682; 0.35315;  
Sequence; PR B [T00696]; 3389; 3395; 2.809330; AACATTA; 1.42090; 2.47706;  
Sequence; PR B [T00696]; 3641; 3647; 3.297560; AATTGTT; 0.47363; 0.97208;  
Sequence; PR A [T01661]; 724; 730; 2.809330; TAATGTT; 1.42090; 2.47706;

Sequence; PR A [T01661]; 1013; 1019; 3.297560; AAATGTT; 0.47363; 0.97208;  
Sequence; PR A [T01661]; 1042; 1048; 2.809330; AACAAATG; 1.42090; 2.47706;  
Sequence; PR A [T01661]; 1044; 1050; 2.809330; CAATGTT; 1.42090; 2.47706;  
Sequence; PR A [T01661]; 2625; 2631; 1.404665; TAGTGTT; 0.71045; 0.90957;  
Sequence; PR A [T01661]; 3005; 3011; 2.809330; AACATTG; 1.42090; 2.47706;  
Sequence; PR A [T01661]; 3119; 3125; 1.404665; TAGTGTT; 0.71045; 0.90957;  
Sequence; PR A [T01661]; 3289; 3295; 1.892895; AAGTGTT; 0.23682; 0.35315;  
Sequence; PR A [T01661]; 3389; 3395; 2.809330; AACATTA; 1.42090; 2.47706;  
Sequence; PR A [T01661]; 3641; 3647; 3.297560; AATTGTT; 0.47363; 0.97208;  
Sequence; E2F [T00221]; 1052; 1061; 0.580821; TTTGGCGCCT; 0.04440; 0.03135;  
Sequence; GATA-2 [T00308]; 144; 152; 3.333333; GGATAAGGT; 0.59204; 0.68263;  
Sequence; GATA-2 [T00308]; 1336; 1344; 3.333333; CCTCTATCT; 0.59204; 0.68263;  
Sequence; GATA-2 [T00308]; 2957; 2965; 3.333333; TGATAAAGA; 0.59204; 0.68263;  
Sequence; NF-AT1 [T01948]; 1564; 1573; 4.823485; TAGCTTTCCA; 0.14801; 0.17726;  
Sequence; NF-AT1 [T01948]; 3017; 3026; 4.134416; ATTTTTTCCA; 0.16281; 0.20143;  
Sequence; NF-AT1 [T01948]; 3143; 3152; 2.067208; GTATTTTCCA; 0.07401; 0.10223;  
Sequence; NF-AT1 [T01948]; 3214; 3223; 0.000000; GAATTTTCCA; 0.00370; 0.00596;  
Sequence; NF-AT1 [T01948]; 3498; 3507; 2.756277; CAGATTTCCA; 0.11471; 0.15215;  
Sequence; STAT1beta [T01573]; 1567; 1576; 2.898434; CTTTCCAGGA; 0.09991; 0.10968;  
Sequence; PEA3 [T00685]; 1596; 1604; 1.194633; AAACATCCT; 0.13321; 0.12928;  
Sequence; T3R-beta1 [T00851]; 671; 679; 3.351341; TACTGGTGA; 0.53284; 0.50461;  
Sequence; T3R-beta1 [T00851]; 1646; 1654; 3.332047; TCACCAGGG; 0.53284; 0.50461;  
Sequence; T3R-beta1 [T00851]; 2062; 2070; 3.332047; CAAAGGTGA; 0.53284; 0.50461;  
Sequence; T3R-beta1 [T00851]; 2473; 2481; 2.221365; TCACCAGTG; 0.29602; 0.26398;  
Sequence; T3R-beta1 [T00851]; 2788; 2796; 3.351341; TACAGGTGA; 0.53284; 0.50461;  
Sequence; T3R-beta1 [T00851]; 2886; 2894; 4.462023; TAAAGGTGA; 0.53284; 0.51640;  
Sequence; T3R-beta1 [T00851]; 3207; 3215; 4.481316; AGAAGGTGA; 0.53284; 0.51640;  
Sequence; T3R-beta1 [T00851]; 3492; 3500; 1.110682; TCACCACAG; 0.14801; 0.10640;  
Sequence; LEF-1 [T02905]; 1415; 1422; 2.218360; TACCAAAG; 0.35522; 0.54715;  
Sequence; LEF-1 [T02905]; 2018; 2025; 2.004405; CTTTGTTT; 0.35522; 0.54715;  
Sequence; LEF-1 [T02905]; 2437; 2444; 0.000000; CTTTGATC; 0.05920; 0.07355;  
Sequence; LEF-1 [T02905]; 3546; 3553; 2.345041; CTTTGCTG; 0.17761; 0.20274;  
Sequence; NF-1 [T00539]; 2056; 2063; 4.135372; TTGGCTCA; 0.47363; 0.32451;  
Sequence; NF-AT1 [T00550]; 906; 914; 2.619709; ATGCTTCC; 0.17761; 0.21657;  
Sequence; NF-AT1 [T00550]; 2110; 2118; 1.437145; GGAAAAAGT; 0.01480; 0.02110;  
Sequence; NF-AT1 [T00550]; 2626; 2634; 3.075022; AGTGTTTCC; 0.05920; 0.05187;  
Sequence; NF-AT1 [T00550]; 3017; 3025; 0.000000; ATTTTTTCC; 0.02960; 0.06017;  
Sequence; TBP [T00794]; 21; 30; 1.871542; TTTATAGCTG; 0.35522; 0.87852;  
Sequence; TBP [T00794]; 2350; 2359; 0.935771; GCTATATAAA; 0.23682; 0.58487;  
Sequence; TBP [T00794]; 2631; 2640; 3.743085; TTCCTATAAA; 0.05920; 0.14500;  
Sequence; TBP [T00794]; 3042; 3051; 0.000000; GGTGTATAAA; 0.05920; 0.14538;  
Sequence; TBP [T00794]; 3086; 3095; 3.743085; TTTATAATAG; 0.05920; 0.14500;  
Sequence; c-Myb [T00137]; 493; 500; 2.687937; GGAAGTTG; 0.11841; 0.10814;  
Sequence; c-Myb [T00137]; 1243; 1250; 0.000000; GGCAGTTG; 0.05920; 0.03887;

Sequence; c-Myb [T00137]; 1556; 1563; 3.469384; GTCAGTTG; 0.23682; 0.21057;  
Sequence; c-Myb [T00137]; 1894; 1901; 2.570796; GGCAGTTT; 0.11841; 0.10814;  
Sequence; c-Myb [T00137]; 2417; 2424; 2.152744; TAACTGGC; 0.11841; 0.08796;  
Sequence; c-Myb [T00137]; 2575; 2582; 4.840682; GCAAGTTA; 0.47363; 0.47578;  
Sequence; c-Myb [T00137]; 2607; 2614; 3.973336; GGAAGTTC; 0.17761; 0.16006;  
Sequence; c-Myb [T00137]; 2942; 2949; 4.754782; GAACTGTC; 0.47363; 0.47578;  
Sequence; c-Myb [T00137]; 3333; 3340; 4.974489; AGCAGTTG; 0.47363; 0.47578;  
Sequence; c-Myb [T00137]; 3652; 3659; 3.973336; GAACTTCC; 0.17761; 0.16006;  
Sequence; Sp1 [T00759]; 2491; 2500; 4.212075; ATACCGCCCC; 0.17391; 0.06011;  
Sequence; RAR-beta [T00721]; 2890; 2899; 2.144554; GGTGAACCCA; 0.14801; 0.13335;  
Sequence; RAR-beta [T00721]; 3258; 3267; 4.307573; TGGGTTTGGG; 0.28122; 0.24283;  
Sequence; RAR-beta [T00721]; 3341; 3350; 2.144554; AGGTTTGTCT; 0.14801; 0.13335;  
Sequence; NF-AT2 [T01945]; 2110; 2119; 3.814941; GGAAAAAGTG; 0.02220; 0.02635;  
Sequence; NF-AT2 [T01945]; 3016; 3025; 3.571424; TATTTTTTCC; 0.06660; 0.10647;  
Sequence; HNF-1A [T00368]; 1218; 1225; 0.781639; GTTAATAG; 0.94727; 1.38218;  
Sequence; HNF-1A [T00368]; 1654; 1661; 4.684871; GTTAACAT; 0.23682; 0.39922;  
Sequence; HNF-1A [T00368]; 3074; 3081; 0.143882; TATTTAAC; 0.47363; 1.12314;  
Sequence; HNF-1A [T00368]; 3123; 3130; 0.143882; GTTAAATA; 0.47363; 1.12314;  
Sequence; POU2F1 [T00641]; 3732; 3742; 0.110596; ATTTGCATATT; 0.00278; 0.00785;  
Sequence; GR [T05076]; 1005; 1011; 3.763516; ATCTTTG; 1.42090; 2.11346;  
Sequence; GR [T05076]; 1049; 1055; 0.000000; TTTTTTG; 0.71045; 1.55049;  
Sequence; GR [T05076]; 1753; 1759; 3.763516; AGTTTTG; 1.42090; 2.11346;  
Sequence; GR [T05076]; 1790; 1796; 0.000000; TTTTTTG; 0.71045; 1.55049;  
Sequence; GR [T05076]; 1861; 1867; 0.000000; TTTTTTG; 0.71045; 1.55049;  
Sequence; GR [T05076]; 2370; 2376; 0.000000; ATTTTTG; 0.71045; 1.55049;  
Sequence; GR [T05076]; 3795; 3801; 0.000000; CAAAAA; 0.71045; 1.55049;  
Sequence; HOXD9 [T01424]; 3010; 3019; 4.321431; TGGTTTTATT; 0.06660; 0.25880;  
Sequence; HOXD9 [T01424]; 3859; 3868; 4.321431; AATAAAATGA; 0.06660; 0.25880;  
Sequence; HOXD10 [T01425]; 3010; 3019; 4.321431; TGGTTTTATT; 0.06660; 0.25880;  
Sequence; HOXD10 [T01425]; 3859; 3868; 4.321431; AATAAAATGA; 0.06660; 0.25880;  
Sequence; Ik-1 [T02702]; 3506; 3518; 2.374299; CAAAGTGCTGGGA; 0.00121; 0.00056;  
Sequence; CTF [T00174]; 3320; 3331; 3.641537; GAGCCAATGAAA; 0.01943; 0.01975;  
Sequence; PPAR-alpha:RXR-alpha [T05221]; 2898; 2908; 2.642917; CACTGGGACTG; 0.01665; 0.01028;  
Sequence; SRY [T00997]; 1007; 1015; 4.087393; CTTTGTTAA; 0.23682; 0.36213;  
Sequence; SRY [T00997]; 2018; 2026; 0.999172; CTTTGTTTT; 0.11841; 0.19887;  
Sequence; SRY [T00997]; 2437; 2445; 3.088221; CTTTGATCT; 0.11841; 0.17627;  
Sequence; E2F-1 [T01542]; 1038; 1045; 3.288084; GCGGAACA; 0.29602; 0.15527;  
Sequence; E2F-1 [T01542]; 2233; 2240; 1.490375; GCGGGATA; 0.11841; 0.06355;  
Sequence; IRF-1 [T00423]; 1304; 1312; 3.692688; TTTCCTTTC; 0.13321; 0.17002;  
Sequence; MAZ [T00490]; 1089; 1101; 4.770629; TCTGGGAGGGAG; 0.00896; 0.00322;  
Sequence; MEF-2A [T01005]; 888; 898; 2.660781; TATTTTTAGGT; 0.01110; 0.03040;
