# Supplementary material for: RETRACTED ARTICLE: Long noncoding RNA SNHG1 promotes TERT expression by sponging miR-18b-5p in breast cancer
Source: Springer Nature journal article supplement (doi:10.1186/s13578-021-00675-5), 2021-08-31
Supplement: MOESM11 [file 13578_2021_675_MOESM11_ESM.pdf]

| Matrix ID | Name | Score   | Relative score | Start | End  | Strand | Predicted sequence |
|-----------|------|---------|----------------|-------|------|--------|--------------------|
| MA0024.1  | E2F1 | 12.0993 | 0.98268        | 1821  | 1828 | +      | tttcgcg            |
| MA0024.2  | E2F1 | 13.6436 | 0.973286       | 430   | 440  | -      | aaggcgggagg        |
| MA0024.2  | E2F1 | 12.78   | 0.960293       | 611   | 621  | +      | atggcgggagc        |
| MA0024.2  | E2F1 | 7.61774 | 0.882628       | 698   | 708  | -      | gtggcgggatg        |
| MA0024.2  | E2F1 | 7.10436 | 0.874905       | 1821  | 1831 | -      | gcggcgcgaaa        |
| MA0024.2  | E2F1 | 6.89836 | 0.871806       | 1476  | 1486 | -      | agctcgggagg        |
| MA0024.2  | E2F1 | 6.71752 | 0.869085       | 511   | 521  | +      | gaggcaggagg        |
| MA0024.2  | E2F1 | 6.60834 | 0.867442       | 285   | 295  | -      | aaggcgggagg        |
| MA0024.2  | E2F1 | 6.60793 | 0.867436       | 778   | 788  | -      | caggcgtgagc        |
| MA0024.2  | E2F1 | 6.24431 | 0.861966       | 721   | 731  | +      | tgggcgacaga        |
| MA0024.2  | E2F1 | 6.24316 | 0.861948       | 1513  | 1523 | -      | agcgcggggga        |
| MA0024.2  | E2F1 | 6.12117 | 0.860113       | 75    | 85   | -      | cagtcgggaaa        |
| MA0024.2  | E2F1 | 6.06232 | 0.859228       | 946   | 956  | +      | gaggcaggaga        |
| MA0024.2  | E2F1 | 5.85387 | 0.856092       | 1735  | 1745 | -      | gtggcaggagc        |
| MA0024.2  | E2F1 | 5.65729 | 0.853134       | 1824  | 1834 | +      | cgcgccgcaag        |
| MA0024.1  | E2F1 | 8.32861 | 0.852931       | 1027  | 1034 | -      | tttcgctc           |
| MA0024.1  | E2F1 | 8.32861 | 0.852931       | 1566  | 1573 | -      | ttccgcg            |
| MA0024.1  | E2F1 | 8.32861 | 0.852931       | 2423  | 2430 | +      | TTACGCGC           |
| MA0024.2  | E2F1 | 5.40621 | 0.849357       | 965   | 975  | +      | aaccgggagg         |
| MA0024.2  | E2F1 | 5.00791 | 0.843364       | 1563  | 1573 | +      | ctggcgcggaa        |
| MA0024.3  | E2F1 | 8.73134 | 0.835013       | 1821  | 1832 | -      | tgcggcgcgaaa       |

|              |      |             |              |          |          |   |              |
|--------------|------|-------------|--------------|----------|----------|---|--------------|
| MA0024.<br>3 | E2F1 | 8.4027<br>3 | 0.82954<br>1 | 181<br>0 | 182<br>1 | - | aaaggcgcgcat |
| MA0024.<br>3 | E2F1 | 8.2834      | 0.82755<br>4 | 182<br>1 | 183<br>2 | + | ttcgcgcccga  |
| MA0024.<br>2 | E2F1 | 2.9470<br>1 | 0.81235<br>9 | 102<br>4 | 103<br>4 | + | caagagcgaaa  |
| MA0024.<br>3 | E2F1 | 7.2725<br>8 | 0.81072<br>5 | 181<br>0 | 182<br>1 | + | atgcgcgccttt |
| MA0024.<br>3 | E2F1 | 7.1288<br>3 | 0.80833<br>1 | 156<br>2 | 157<br>3 | - | ttccgcgccagt |
| MA0024.<br>2 | E2F1 | 2.5581<br>7 | 0.80650<br>9 | 165<br>4 | 166<br>4 | + | caaggggcagc  |
| MA0024.<br>2 | E2F1 | 2.2609<br>2 | 0.80203<br>7 | 136<br>1 | 137<br>1 | + | aacgcaccaga  |
| MA0024.<br>1 | E2F1 | 6.8135<br>2 | 0.80079<br>7 | 75       | 82       | + | tttcccga     |
| MA0024.<br>1 | E2F1 | 6.8135<br>2 | 0.80079<br>7 | 144<br>5 | 145<br>2 | + | tttcccga     |
| MA0024.<br>2 | E2F1 | 2.1261<br>7 | 0.80000<br>9 | 183<br>9 | 184<br>9 | - | aaagcgccacc  |
