# Supplementary figures and images for: RETRACTED ARTICLE: Long noncoding RNA SNHG1 promotes TERT expression by sponging miR-18b-5p in breast cancer
Source: Springer Nature journal article supplement (doi:10.1186/s13578-021-00675-5), 2021-08-31

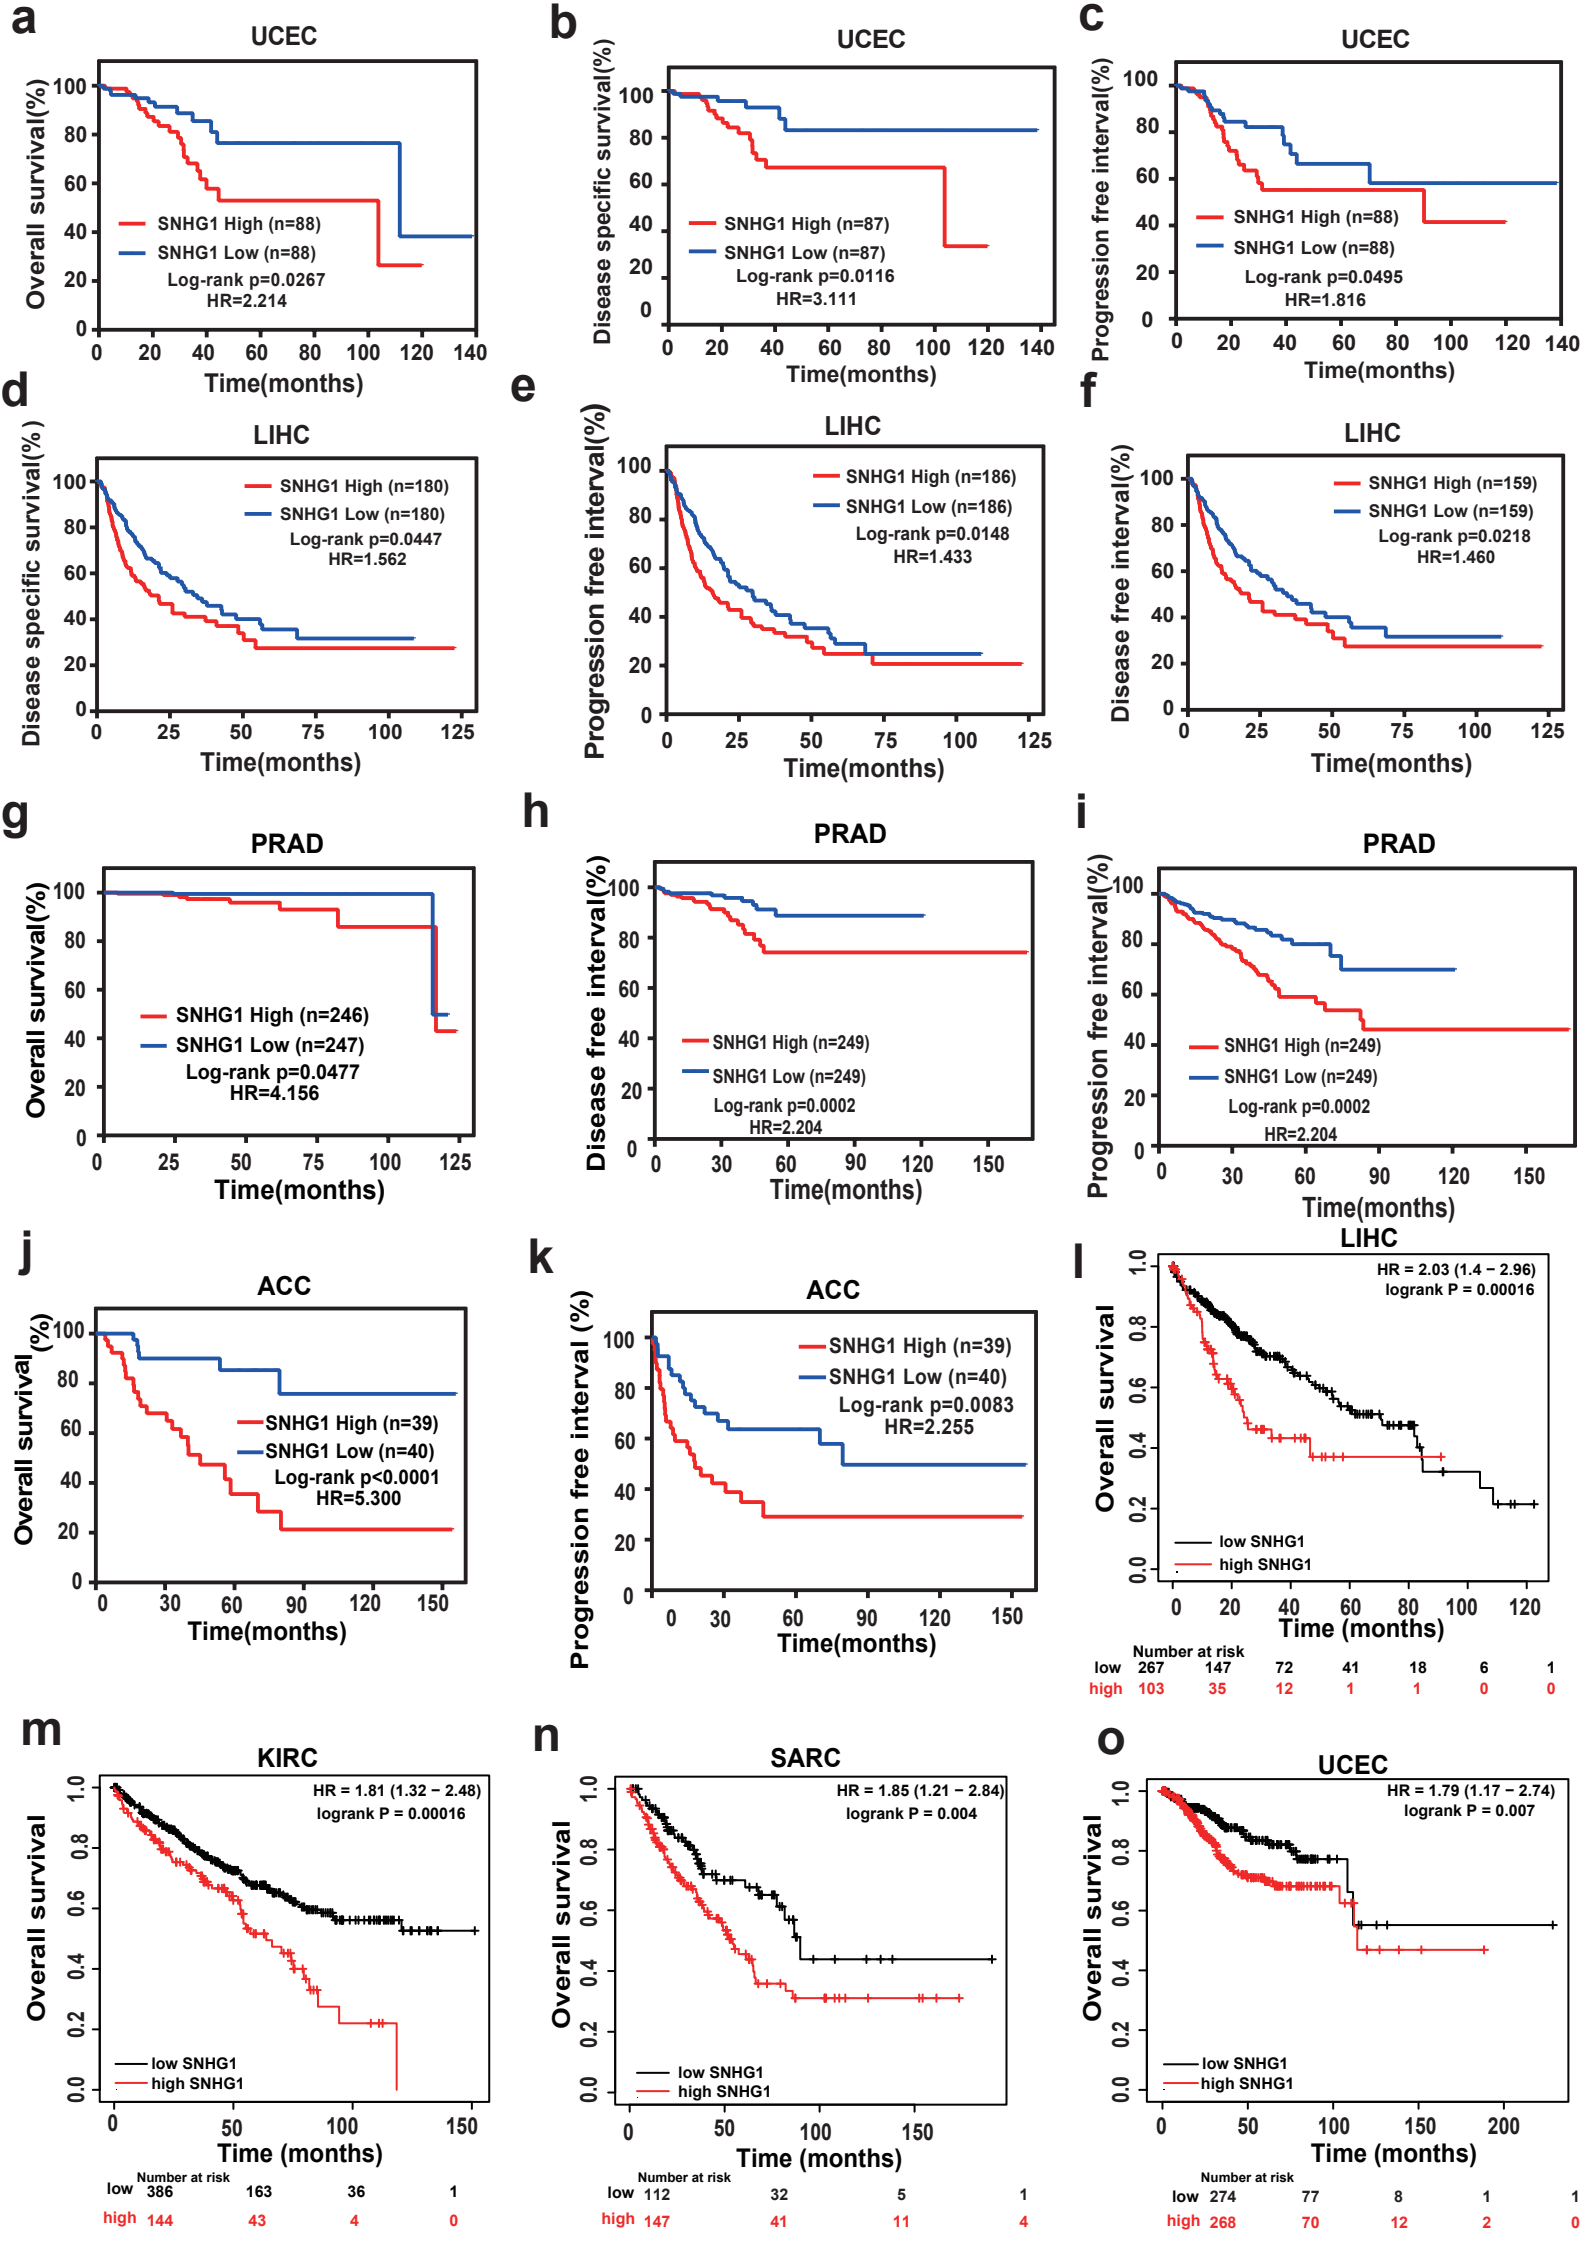

Supplement: MOESM1 [file 13578_2021_675_MOESM1_ESM.pdf]

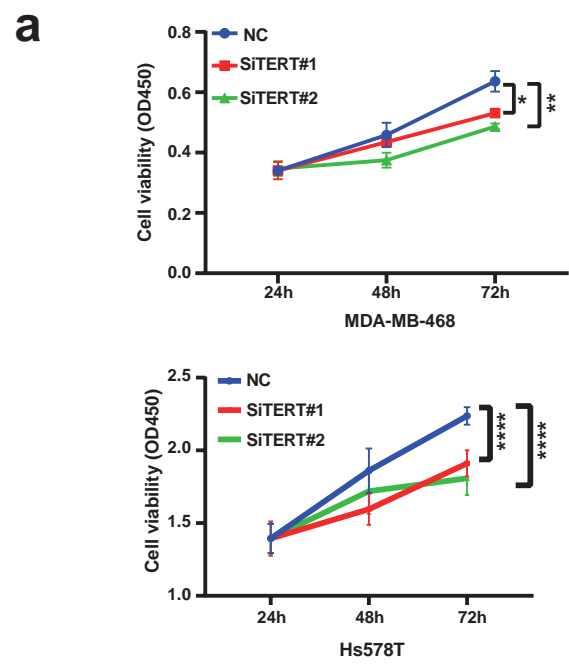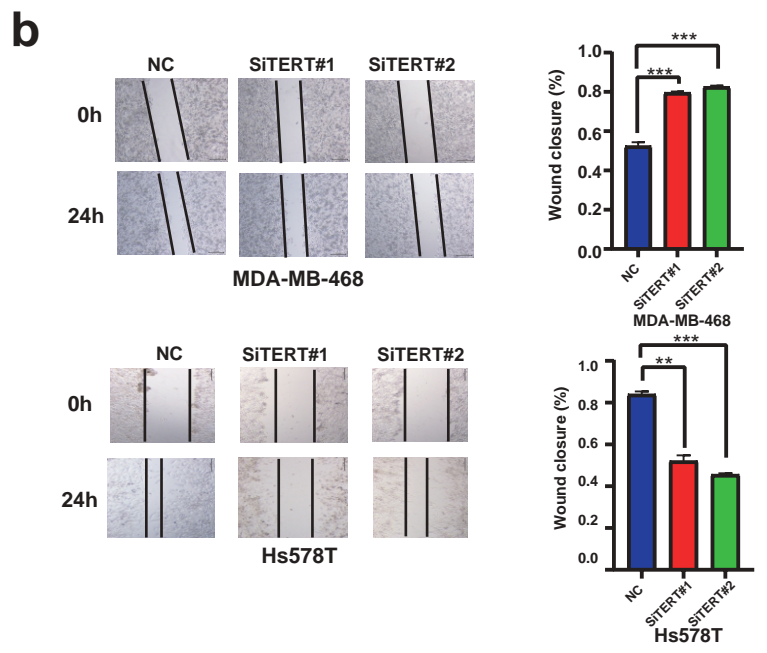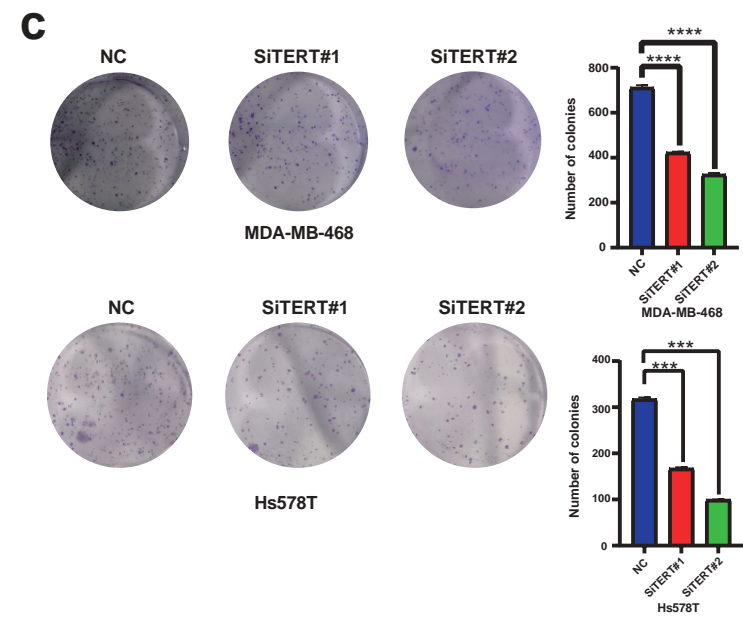

Supplement: MOESM2 [file 13578_2021_675_MOESM2_ESM.pdf]
